# Supplementary material for: Pyridine-based small molecule inhibitors of SARM1 alleviate cell death caused by NADase activity
Source: Royal Society of Chemistry journal article supplement (doi:10.1039/d4cc02650k), 2024-01-01
Supplement: d4cc02650k1.pdf [file d4cc02650k1.pdf]

Supplementary Information for

**Pyridine-based small molecule inhibitors of SARM1  
alleviate cell death caused by NADase activity.**

Qingxuan Tang<sup>a,b</sup>, and Hang Yin<sup>a,b\*</sup>

a. School of Pharmaceutical Sciences, Tsinghua University, Beijing 100084, China. E-mail: yin\_hang@tsinghua.edu.cn. Tsinghua-Peking Joint Center for Life Sciences, Tsinghua University, Beijing 100084, China. Key Laboratory of Bioorganic Phosphorous chemistry and Chemical Biology (Ministry of Education), Tsinghua University, Beijing 100084, China. State Key Laboratory of Membrane Biology, Tsinghua University, Beijing 100084, China

b. Peking University-Tsinghua University-National Institute of Biological Sciences Joint Graduate Program, Tsinghua University, Beijing 100084, China

\*To whom correspondence may be addressed. H. Yin ([yin\\_hang@tsinghua.edu.cn](mailto:yin_hang@tsinghua.edu.cn)).

---

# Contents

## 1. Chemical synthesis and Characterizations

General chemistry method

Compounds synthesis and characterizations

## 2. Materials and Methods

Cell Culture and CCK-8 Assay Methods

SARM1 Protein Expression Method

## 3. Supplementary Tables and Figures

**Figure S1A:** High-throughput Screening Methodology

**Figure S1B:** Enzymatic Assay Details and Reaction Scheme of ADPR, cADPR, and 1,N6-Etheno-NAD Production

**Figure S2:** Schematic Diagram and High-Resolution Mass Spectrometry Analysis of the Reaction Product AD-S-1.

**Figure S3:** Expression Levels of SARM1 in a Tet-On 3G Inducible Expression System Across Different Doxycycline (Dox) Concentrations

**Figure S4:** Enzyme Kinetic Studies of S-1 and TH408.

**Figure S5:** Cytotoxicity Evaluation of the Molecules.

**Table S1:** Compound SMILES strings

**Table S2:** Introduction of Life Chemicals- Pre-plated Diversity Sets

## 4. NMR Spectra

## 5. HRMS spectra and HPLC trace

## Chemical synthesis and Characterizations

### General chemistry methods

NMR spectra were acquired on a Bruker AVANCE III HD 400 nuclear magnetic resonance spectrometer, running at 400 MHz for  $^1\text{H}$  and 101 MHz for  $^{13}\text{C}$ .  $^1\text{H}$  NMR spectra were recorded in  $\text{CHCl}_3\text{-d}$  and  $(\text{CH}_3)_2\text{SO-d}_6$ , using residual  $\text{CHCl}_3$  (7.26 ppm) and DMSO (2.50 ppm) as the internal reference.  $^{13}\text{C}$  NMR spectra were recorded in  $\text{CHCl}_3\text{-d}$  and  $(\text{CH}_3)_2\text{SO-d}_6$ , using residual  $\text{CHCl}_3$  (77.16 ppm), DMSO (39.52 ppm) as the internal reference. Mass spectrometry was performed using a Thermo Scientific QExactive mass spectrometer (ESI). Analytical grade solvents and commercially available reagents were used without further purification.

### Compounds synthesis and characterization

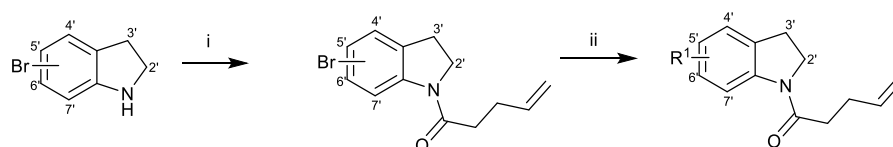

$\text{R}^1$  is substituted pyridine groups

#### Scheme S1: synthesis of substituted pyridine derivatives.

Reagents and conditions: (i) pent-4-enoyl chloride,  $\text{Et}_3\text{N}$ , DCM, 0 °C, 30 min, then R.T., 3 h; (ii) pyridineboronic acid pinacol ester,  $\text{K}_2\text{CO}_3$ ,  $\text{Pd}(\text{PPh}_3)_4$ , dioxane/water = 4:1, 90 °C, overnight

#### 1-(5-(pyridin-4-yl)-2,3-dihydro-1H-indol-1-yl)pent-4-en-1-one (S-1)

A round-bottom flask was charged with 5-bromoindoline (1.0 g, 1.0 equiv) and triethylamine ( $\text{Et}_3\text{N}$ , 2.0 mL, 3.0 equiv) under an atmosphere of nitrogen. Anhydrous solvent dichloromethane (20 mL) was added, followed by the dropwise addition of reactant pent-4-enoyl chloride (0.9 mL, 1.5 equiv) under ice-bath condition. After stirring for 30 min under the ice bath, the reaction mixture was allowed to stir for 3 hours at room temperature. Then 80 mL water and ethyl acetate (80 mL $\times$ 3) were added for extraction. The combined organic layers were dried over anhydrous sodium sulfate, filtered, and concentrated under vacuum to give the crude product 1-(5-bromoindolin-1-yl)pent-4-en-1-one as white solid, which was used in the next step without further purification. To the mixture of the intermediate product, potassium carbonate ( $\text{K}_2\text{CO}_3$ , 2.0 g, 3.0 equiv), and 4-pyridineboronic acid pinacol ester (1.0 g, 1.0 equiv) in a solvent mixture of dioxane and water (4:1), the tetrakis(triphenylphosphine)palladium (0.6 g, 0.1 equiv) was added under a nitrogen atmosphere. The reaction was heated to 90°C and stirred for 12 hours, after which it was allowed

---

to reach room temperature. Then 100 mL water and ethyl acetate (100 mL×3) were added for extraction. The combined organic layers were washed with brine and dried over anhydrous sodium sulfate. The residue was purified on silica gel via petroleum ether : ethyl acetate = 1 : 1 to give a white solid (0.97 g, 71%). <sup>1</sup>H NMR (400 MHz, Chloroform-d) δ 8.62 (d, J = 5.2 Hz, 2H), 8.33 (d, J = 8.4 Hz, 1H), 7.52 – 7.45 (m, 4H), 5.93 (ddt, J = 16.4, 11.5, 6.0 Hz, 1H), 5.17 – 5.00 (m, 2H), 4.13 (t, J = 8.5 Hz, 2H), 3.27 (t, J = 8.5 Hz, 2H), 2.60 – 2.46 (m, 4H). <sup>13</sup>C NMR (101 MHz, Chloroform-d) δ 170.76, 150.11, 147.99, 144.06, 137.22, 133.26, 132.14, 126.69, 123.00, 121.22, 117.33, 115.51, 48.25, 35.23, 28.50, 27.96. HRMS (ESI) calculated C<sub>18</sub>H<sub>18</sub>N<sub>2</sub>O, [M+H]<sup>+</sup> = 279.1497, and measured [M+H]<sup>+</sup>: 279.1512

#### **1-(5-(pyridin-3-yl)-2,3-dihydro-1H-indol-1-yl)pent-4-en-1-one (S-2)**

**S-2** was prepared in a similar manner described for **S-1**. Yield: 47%. <sup>1</sup>H NMR (400 MHz, Chloroform-d) δ 8.84 (d, J = 2.4 Hz, 1H), 8.57 (d, J = 4.7 Hz, 1H), 8.35 (d, J = 8.1 Hz, 1H), 7.85 (dt, J = 7.9, 2.0 Hz, 1H), 7.46 – 7.41 (m, 2H), 7.35 (dd, J = 7.9, 4.8 Hz, 1H), 5.95 (ddt, J = 16.2, 9.8, 5.9 Hz, 1H), 5.24 – 4.95 (m, 2H), 4.14 (t, J = 8.5 Hz, 2H), 3.29 (t, J = 8.5 Hz, 2H), 2.64 – 2.46 (m, 4H). <sup>13</sup>C NMR (101 MHz, Chloroform-d) δ 170.66, 148.12, 148.08, 143.20, 137.29, 136.34, 133.97, 133.17, 132.12, 126.67, 123.51, 123.14, 117.37, 115.48, 48.20, 35.20, 28.53, 28.02. HRMS (ESI) calculated C<sub>18</sub>H<sub>18</sub>N<sub>2</sub>O, [M+H]<sup>+</sup> = 279.1497, and measured [M+H]<sup>+</sup>: 279.1518

#### **1-(5-(4-methoxypyridin-3-yl)-2,3-dihydro-1H-indol-1-yl)pent-4-en-1-one (S-3)**

**S-3** was prepared in a similar manner described for **S-1**. Yield: 32%. <sup>1</sup>H NMR (400 MHz, Chloroform-d) δ 8.53 – 8.39 (m, 2H), 8.31 (d, J = 8.3 Hz, 1H), 7.39 – 7.33 (m, 2H), 6.89 (d, J = 5.6 Hz, 1H), 5.95 (ddt, J = 16.4, 11.7, 5.9 Hz, 1H), 5.19 – 5.01 (m, 2H), 4.11 (t, J = 8.5 Hz, 2H), 3.88 (s, 3H), 3.26 (t, J = 8.5 Hz, 2H), 2.60 – 2.48 (m, 4H). <sup>13</sup>C NMR (101 MHz, Chloroform-d) δ 170.52, 162.47, 150.70, 150.23, 142.71, 137.33, 131.15, 130.03, 128.99, 126.33, 125.56, 116.72, 115.41, 106.40, 55.38, 48.19, 35.18, 28.58, 28.04. HRMS (ESI) calculated C<sub>19</sub>H<sub>20</sub>N<sub>2</sub>O<sub>2</sub>, [M+H]<sup>+</sup> = 309.1603, and measured [M+H]<sup>+</sup>: 309.1606

#### **1-(5-(2-methylpyridin-4-yl)-2,3-dihydro-1H-indol-1-yl)pent-4-en-1-one (S-4)**

**S-4** was prepared in a similar manner described for **S-1**. Yield: 80%. <sup>1</sup>H NMR (400 MHz, Chloroform-

---

d)  $\delta$  8.52 (d,  $J$  = 5.2 Hz, 1H), 8.34 (d,  $J$  = 8.3 Hz, 1H), 7.55 – 7.45 (m, 2H), 7.36 (s, 1H), 7.30 (d,  $J$  = 5.3 Hz, 1H), 5.96 (ddt,  $J$  = 16.5, 10.2, 6.1 Hz, 1H), 5.19 – 5.01 (m, 2H), 4.14 (t,  $J$  = 8.5 Hz, 2H), 3.29 (t,  $J$  = 8.5 Hz, 2H), 2.62 (s, 3H), 2.60 – 2.48 (m, 4H).  $^{13}\text{C}$  NMR (101 MHz, Chloroform- $d$ )  $\delta$  170.73, 158.82, 149.58, 148.22, 143.88, 137.26, 133.62, 132.05, 126.67, 123.02, 120.73, 118.44, 117.25, 115.51, 48.23, 35.21, 28.50, 27.97, 24.61. HRMS (ESI) calculated  $\text{C}_{19}\text{H}_{20}\text{N}_2\text{O}$ ,  $[\text{M}+\text{H}]^+ = 293.1654$ , and measured  $[\text{M}+\text{H}]^+$ : 293.1650

**1-(5-(2,6-dimethylpyridin-4-yl)-2,3-dihydro-1H-indol-1-yl)pent-4-en-1-one (S-5)**

**S-5** was prepared in a similar manner described for **S-1**. Yield: 67%.  $^1\text{H}$  NMR (400 MHz, Chloroform- $d$ )  $\delta$  8.33 (d,  $J$  = 8.3 Hz, 1H), 7.50 (d,  $J$  = 8.6 Hz, 1H), 7.47 (s, 1H), 7.17 (s, 2H), 5.96 (ddt,  $J$  = 16.4, 11.6, 6.0 Hz, 1H), 5.24 – 4.97 (m, 2H), 4.14 (t,  $J$  = 5.3 Hz, 2H), 3.28 (t,  $J$  = 8.4 Hz, 2H), 2.59 (s, 6H), 2.59 – 2.49 (m, 4H).  $^{13}\text{C}$  NMR (101 MHz, Chloroform- $d$ )  $\delta$  170.82, 158.24, 158.24, 148.67, 137.40, 134.03, 132.07, 126.77, 126.17, 123.15, 118.04, 118.04, 117.31, 115.61, 48.34, 35.32, 28.62, 28.09, 24.74. HRMS (ESI) calculated  $\text{C}_{20}\text{H}_{22}\text{N}_2\text{O}$ ,  $[\text{M}+\text{H}]^+ = 307.1810$ , and measured  $[\text{M}+\text{H}]^+$ : 307.1828

**1-(5-(2-(trifluoromethyl)pyridin-4-yl)-2,3-dihydro-1H-indol-1-yl)pent-4-en-1-one (S-6)**

**S-6** was prepared in a similar manner described for **S-1**. Yield: 40%.  $^1\text{H}$  NMR (400 MHz, Chloroform- $d$ )  $\delta$  8.71 (d,  $J$  = 5.2 Hz, 1H), 8.36 (d,  $J$  = 8.3 Hz, 1H), 7.85 (s, 1H), 7.65 (d,  $J$  = 5.2 Hz, 1H), 7.52 (d,  $J$  = 8.7 Hz, 1H), 7.49 (s, 1H), 5.93 (ddt,  $J$  = 16.5, 11.6, 6.2 Hz, 1H), 5.20 – 4.98 (m, 2H), 4.14 (t,  $J$  = 8.4 Hz, 2H), 3.29 (t,  $J$  = 8.5 Hz, 2H), 2.72 – 2.33 (m, 4H).  $^{13}\text{C}$  NMR (101 MHz, Chloroform- $d$ )  $\delta$  171.03, 150.53, 149.86, 148.81, 144.87, 137.28, 132.61, 131.98, 127.04, 123.68, 123.20, 120.47, 117.99 (d,  $J$  = 2.8 Hz), 117.59, 115.69, 48.39, 35.37, 28.57, 28.03. HRMS (ESI) calculated  $\text{C}_{19}\text{H}_{17}\text{F}_3\text{N}_2\text{O}$ ,  $[\text{M}+\text{H}]^+ = 347.1371$ , and measured  $[\text{M}+\text{H}]^+$ : 347.1370

**1-(5-(5-methoxypyridin-3-yl)-2,3-dihydro-1H-indol-1-yl)pent-4-en-1-one (S-7)**

**S-7** was prepared in a similar manner described for **S-1**. Yield: 61%.  $^1\text{H}$  NMR (400 MHz, Chloroform- $d$ )  $\delta$  8.30 (d,  $J$  = 8.4 Hz, 1H), 8.16 (d,  $J$  = 5.4 Hz, 1H), 7.46 (d,  $J$  = 8.4 Hz, 1H), 7.42 (s, 1H), 7.06 (dd,  $J$  = 5.4, 1.5 Hz, 1H), 6.90 (d,  $J$  = 1.5 Hz, 1H), 5.92 (ddt, 1H), 5.22 – 4.93 (m, 2H), 4.09 (t,  $J$  = 8.5 Hz, 2H), 3.96 (s, 3H), 3.24 (t,  $J$  = 8.5 Hz, 2H), 2.51 (q,  $J$  = 5.5, 4.7 Hz, 4H).  $^{13}\text{C}$  NMR (101 MHz, Chloroform- $d$ )  $\delta$  170.70, 164.95, 150.74, 147.17, 143.91, 137.26, 133.43, 131.99, 126.63, 123.01, 117.16, 115.49,

---

115.04, 107.85, 53.50, 48.22, 35.19, 28.50, 27.94. HRMS (ESI) calculated  $C_{19}H_{20}N_2O_2$ ,  $[M+H]^+ = 309.1603$ , and measured  $[M+H]^+$ : 309.1606

**1-(5-(2-chloropyridin-4-yl)-2,3-dihydro-1H-indol-1-yl)pent-4-en-1-one (S-8)**

**S-8** was prepared in a similar manner described for **S-1**. Yield: 67%.  $^1H$  NMR (400 MHz, Chloroform-d)  $\delta$  8.37 (d,  $J = 5.2$  Hz, 1H), 8.32 (d,  $J = 8.3$  Hz, 1H), 7.49 (d,  $J = 1.5$  Hz, 1H), 7.46 (d,  $J = 8.4$  Hz, 1H), 7.44 (s, 1H), 7.38 (dd,  $J = 5.2, 1.5$  Hz, 1H), 5.92 (ddt,  $J = 16.4, 10.1, 6.1$  Hz, 1H), 5.16 – 5.01 (m, 2H), 4.13 (t,  $J = 8.5$  Hz, 2H), 3.26 (t,  $J = 8.5$  Hz, 2H), 2.63 – 2.41 (m, 4H).  $^{13}C$  NMR (101 MHz, Chloroform-d)  $\delta$  170.97, 152.35, 151.20, 150.04, 144.69, 137.29, 132.44, 131.97, 126.96, 123.16, 121.56, 120.10, 117.48, 115.66, 48.37, 35.35, 28.57, 28.02. HRMS (ESI) calculated  $C_{18}H_{17}ClN_2O$ ,  $[M+H]^+ = 313.1108$ , and measured  $[M+H]^+$ : 313.1118

**1-(5-(3-chloropyridin-4-yl)-2,3-dihydro-1H-indol-1-yl)pent-4-en-1-one (TH-408)**

**TH-408** was prepared in a similar manner described for **S-1**. Yield: 49%.  $^1H$  NMR (400 MHz, Chloroform-d)  $\delta$  8.64 (s, 1H), 8.48 (d,  $J = 4.8$  Hz, 1H), 8.33 (d,  $J = 8.4$  Hz, 1H), 7.35 – 7.30 (m, 2H), 7.25 (d,  $J = 4.9$  Hz, 1H), 5.93 (ddt,  $J = 16.3, 11.4, 6.0$  Hz, 1H), 5.20 – 4.98 (m, 2H), 4.13 (t,  $J = 8.5$  Hz, 2H), 3.27 (t,  $J = 8.5$  Hz, 2H), 2.64 – 2.42 (m, 4H).  $^{13}C$  NMR (101 MHz, Chloroform-d)  $\delta$  170.85, 150.24, 147.91, 147.40, 143.80, 137.30, 131.69, 131.42, 130.19, 128.82, 125.34, 125.23, 116.84, 115.58, 48.30, 35.29, 28.59, 28.04. HRMS (ESI) calculated  $C_{18}H_{17}ClN_2O$ ,  $[M+H]^+ = 313.1108$ , and measured  $[M+H]^+$ : 313.1114

**1-(5-(3-fluoropyridin-4-yl)-2,3-dihydro-1H-indol-1-yl)pent-4-en-1-one (S-9)**

**S-9** was prepared in a similar manner described for **S-1**. Yield: 35%.  $^1H$  NMR (400 MHz, Chloroform-d)  $\delta$  8.50 (d,  $J = 2.1$  Hz, 1H), 8.42 (d,  $J = 4.8$  Hz, 1H), 8.34 (d,  $J = 8.6$  Hz, 1H), 7.49 – 7.43 (m, 2H), 7.37 (dd,  $J = 4.8, 2.1$  Hz, 2H), 5.93 (ddt,  $J = 16.3, 11.5, 6.0$  Hz, 1H), 5.20 – 4.94 (m, 2H), 4.13 (t,  $J = 8.5$  Hz, 2H), 3.27 (t,  $J = 8.5$  Hz, 2H), 2.65 – 2.45 (m, 4H).  $^{13}C$  NMR (101 MHz, Chloroform-d)  $\delta$  170.96, 158.07, 155.52, 146.12, 146.07, 139.27, 139.01, 137.34, 131.86, 128.67, 125.18, 124.00, 117.24, 115.65, 48.36, 35.37, 28.62, 28.07. HRMS (ESI) calculated  $C_{18}H_{17}FN_2O$ ,  $[M+H]^+ = 297.1403$ , and measured  $[M+H]^+$ : 297.141

---

**1-(5-(3-(trifluoromethyl)pyridin-4-yl)-2,3-dihydro-1H-indol-1-yl)pent-4-en-1-one (S-10)**

**S-10** was prepared in a similar manner described for **S-1**. Yield: 79%. <sup>1</sup>H NMR (400 MHz, Chloroform-d) δ 8.95 (s, 1H), 8.76 (d, J = 5.0 Hz, 1H), 8.31 (d, J = 8.6 Hz, 1H), 7.27 (d, J = 5.0 Hz, 1H), 7.19 – 7.14 (m, 2H), 5.94 (ddt, J = 16.3, 10.0, 6.0 Hz, 1H), 5.20 – 4.90 (m, 2H), 4.14 (t, J = 8.5 Hz, 2H), 3.26 (t, J = 8.5 Hz, 2H), 2.62 – 2.40 (m, 4H). <sup>13</sup>C NMR (101 MHz, Chloroform-d) δ 170.91, 152.61, 149.47, 147.58 (d, J = 6.0 Hz), 143.81, 137.35, 132.37, 131.30, 128.19, 126.24, 124.62, 124.43, 122.42, 116.67, 115.60, 48.29, 35.34, 28.61, 28.03. HRMS (ESI) calculated C<sub>19</sub>H<sub>17</sub>F<sub>3</sub>N<sub>2</sub>O, [M+H]<sup>+</sup> = 347.1371, and measured [M+H]<sup>+</sup>: 347.1375

**1-(5-(3-nitropyridin-4-yl)-2,3-dihydro-1H-indol-1-yl)pent-4-en-1-one (S-11)**

**S-11** was prepared in a similar manner described for **S-1**. Yield: 55%. <sup>1</sup>H NMR (400 MHz, Chloroform-d) δ 9.04 (s, 1H), 8.78 (d, J = 5.0 Hz, 1H), 8.36 (d, J = 8.3 Hz, 1H), 7.41 (d, J = 5.1 Hz, 1H), 7.23 (d, J = 8.3 Hz, 1H), 7.16 (s, 1H), 5.95 (ddt, J = 16.3, 10.2, 6.1 Hz, 1H), 5.23 – 4.99 (m, 2H), 4.15 (t, J = 8.5 Hz, 2H), 3.26 (t, J = 8.5 Hz, 2H), 2.65 – 2.43 (m, 4H). <sup>13</sup>C NMR (101 MHz, Chloroform-d) δ 170.90, 152.62, 145.64, 145.21, 144.57, 143.56, 137.14, 132.14, 129.27, 127.67, 125.60, 123.78, 117.37, 115.56, 48.23, 35.24, 28.45, 27.85. HRMS (ESI) calculated C<sub>18</sub>H<sub>17</sub>N<sub>3</sub>O<sub>3</sub>, [M+H]<sup>+</sup> = 324.1348, and measured [M+H]<sup>+</sup>: 324.1340

**1-(5-(3-methoxypyridin-4-yl)-2,3-dihydro-1H-indol-1-yl)pent-4-en-1-one (S-12)**

**S-12** was prepared in a similar manner described for **S-1**. Yield: 57%. <sup>1</sup>H NMR (400 MHz, Chloroform-d) δ 8.35 (s, 1H), 8.33 – 8.26 (m, 2H), 7.45 – 7.39 (m, 2H), 7.23 (d, J = 4.5 Hz, 1H), 5.93 (ddt, J = 16.5, 11.6, 6.0 Hz, 1H), 5.20 – 4.95 (m, 2H), 4.11 (t, J = 8.5 Hz, 2H), 3.91 (s, 3H), 3.26 (t, J = 8.5 Hz, 2H), 2.61 – 2.46 (m, 4H). <sup>13</sup>C NMR (101 MHz, Chloroform-d) δ 170.77, 143.36, 143.19, 137.54, 137.42, 134.61, 131.24, 131.05, 128.96, 128.66, 125.49, 124.38, 116.88, 115.59, 56.47, 48.35, 35.34, 28.69, 28.15. HRMS (ESI) calculated C<sub>19</sub>H<sub>20</sub>N<sub>2</sub>O<sub>2</sub>, [M+H]<sup>+</sup> = 309.1603, and measured [M+H]<sup>+</sup>: 309.1606

**1-(4-(3-chloropyridin-4-yl)-2,3-dihydro-1H-indol-1-yl)pent-4-en-1-one (S-13)**

**S-13** was prepared in a similar manner described for **S-1**. Yield: 49%. <sup>1</sup>H NMR (400 MHz,

---

Chloroform-d)  $\delta$  8.67 (s, 1H), 8.51 (d,  $J = 4.7$  Hz, 1H), 8.33 (d,  $J = 8.0$  Hz, 1H), 7.28 (t,  $J = 7.9$  Hz, 1H), 7.19 (d,  $J = 4.8$  Hz, 1H), 6.89 (d,  $J = 7.6$  Hz, 1H), 5.91 (ddt,  $J = 16.3, 11.5, 6.0$  Hz, 1H), 5.17 – 4.99 (m, 2H), 4.06 (t,  $J = 8.5$  Hz, 2H), 3.00 (t,  $J = 8.5$  Hz, 2H), 2.67 – 2.32 (m, 4H).  $^{13}\text{C}$  NMR (101 MHz, Chloroform-d)  $\delta$  170.66, 149.86, 147.74, 146.61, 143.36, 137.24, 133.31, 130.71, 129.54, 128.08, 125.12, 123.56, 117.23, 115.44, 47.96, 35.20, 28.48, 27.24. HRMS (ESI) calculated  $\text{C}_{18}\text{H}_{17}\text{ClN}_2\text{O}$ ,  $[\text{M}+\text{H}]^+ = 313.1108$ , and measured  $[\text{M}+\text{H}]^+$ : 313.1118

**1-(6-(3-chloropyridin-4-yl)-2,3-dihydro-1H-indol-1-yl)pent-4-en-1-one (S-14)**

**S-14** was prepared in a similar manner described for **S-1**. Yield: 63%.  $^1\text{H}$  NMR (400 MHz, Chloroform-d)  $\delta$  8.65 (s, 1H), 8.48 (d,  $J = 4.4$  Hz, 1H), 8.39 (s, 1H), 7.31 – 7.27 (m, 2H), 7.14 (d,  $J = 7.5$  Hz, 1H), 5.92 (ddt,  $J = 16.2, 9.9, 6.0$  Hz, 1H), 5.39 – 4.87 (m, 2H), 4.12 (t,  $J = 8.6$  Hz, 2H), 3.26 (t,  $J = 8.5$  Hz, 2H), 2.71 – 2.38 (m, 4H).  $^{13}\text{C}$  NMR (101 MHz, Chloroform-d)  $\delta$  170.87, 150.11, 147.81, 143.49, 137.35, 136.10, 132.03, 130.35, 128.61, 126.14, 125.60, 124.47, 117.54, 115.57, 48.31, 35.29, 28.53, 28.06. HRMS (ESI) calculated  $\text{C}_{18}\text{H}_{17}\text{ClN}_2\text{O}$ ,  $[\text{M}+\text{H}]^+ = 313.1108$ , and measured  $[\text{M}+\text{H}]^+$ : 313.1118

**1-(7-(3-chloropyridin-4-yl)-2,3-dihydro-1H-indol-1-yl)pent-4-en-1-one (S-15)**

**S-15** was prepared in a similar manner described for **S-1**. Yield: 81%.  $^1\text{H}$  NMR (400 MHz, Chloroform-d)  $\delta$  8.57 (s, 1H), 8.48 (d,  $J = 4.9$  Hz, 1H), 7.31 (d,  $J = 7.1$  Hz, 1H), 7.25 (d,  $J = 5.0$  Hz, 1H), 7.20 – 7.11 (m, 2H), 5.69 (ddt,  $J = 16.8, 10.3, 6.4$  Hz, 1H), 5.04 – 4.87 (m, 2H), 4.15 (t,  $J = 7.8$  Hz, 2H), 3.14 (t,  $J = 7.5$  Hz, 2H), 2.39 – 2.18 (m, 4H).  $^{13}\text{C}$  NMR (101 MHz, Chloroform-d)  $\delta$  150.16, 149.38, 147.93, 147.64, 140.35, 136.97, 134.82, 130.00, 129.50, 126.54, 125.28, 124.84, 124.13, 115.48, 49.70, 34.82, 29.52, 29.12. HRMS (ESI) calculated  $\text{C}_{18}\text{H}_{17}\text{ClN}_2\text{O}$ ,  $[\text{M}+\text{H}]^+ = 313.1108$ , and measured  $[\text{M}+\text{H}]^+$ : 313.1118



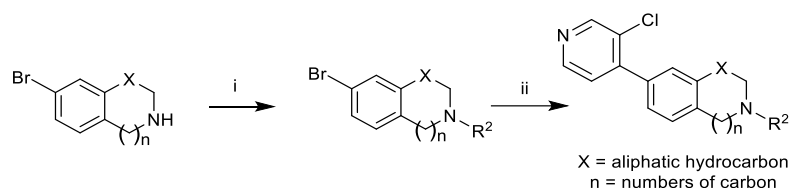

R<sup>2</sup> is substituted carbonyl groups

**Scheme S2: synthesis of 3-chloropyridine substituted hydroindole derivatives.**

Reagents and conditions: (i) substituted acyl chloride, Et<sub>3</sub>N, DCM, 0 °C, 30 min, then R.T., overnight; (ii) 3-chloropyridine-4-boronic acid pinacol ester, K<sub>2</sub>CO<sub>3</sub>, Pd(PPh<sub>3</sub>)<sub>4</sub>, dioxane/water = 4:1, 90 °C, overnight

**1-(5'-(3-chloropyridin-4-yl)spiro[cyclopentane-1,3'-indolin]-1'-yl)pent-4-en-1-one (S-16)**

A round-bottom flask was charged with 5-bromospiro[1,2-dihydroindole-3,1'-cyclopentane] (1.0 g, 1.0 equiv) and triethylamine (Et<sub>3</sub>N, 1.6 mL, 3.0 equiv) under an atmosphere of nitrogen. Anhydrous solvent dichloromethane (20 mL) was added, followed by the dropwise addition of reactant pent-4-enoyl chloride (0.7 mL, 1.5 equiv) under ice-bath condition. After stirring for 30 min under the ice bath, the reaction mixture was allowed to stir overnight at room temperature. Then 80 mL water and ethyl acetate (80 mL×3) were added for extraction. The combined organic layers were dried over anhydrous sodium sulfate, filtered, and concentrated under vacuum to give the crude product 1-(5'-bromospiro[cyclopentane-1,3'-indolin]-1'-yl)pent-4-en-1-one as white solid, which was used in the next step without further purification. To the mixture of the intermediate product, potassium carbonate (K<sub>2</sub>CO<sub>3</sub>, 1.6 g, 3.0 equiv), and 3-chloropyridine-4-boronic acid pinacol ester (0.8 g, 1.0 equiv) in a solvent mixture of dioxane and water (4:1), the tetrakis(triphenylphosphine)palladium (0.5 g, 0.1 equiv) was added under a nitrogen atmosphere. The reaction was heated to 90 °C and stirred for 12 hours, after which it was allowed to reach room temperature. Then 100 mL water and ethyl acetate (100 mL×3) were added for extraction. The combined organic layers were washed with brine and dried over anhydrous sodium sulfate. The residue was purified on silica gel via petroleum ether : ethyl acetate = 1 : 1 to give a white solid (0.72 g, 57%). <sup>1</sup>H NMR (400 MHz, Chloroform-d) δ 8.65 (s, 1H), 8.49 (d, J = 4.9 Hz, 1H), 8.32 (d, J = 8.3 Hz, 1H), 7.37 – 7.24 (m, 4H), 5.94 (ddt, J = 16.4, 11.7, 6.0 Hz, 1H), 5.25 – 4.99 (m, 2H), 3.89 (s, 2H), 2.65 – 2.43 (m, 4H), 1.96 – 1.76 (m, 8H). <sup>13</sup>C NMR (101 MHz, Chloroform-d) δ 170.82, 150.31, 147.96, 147.56, 143.17, 139.57, 137.33, 132.01, 130.24, 128.93, 125.40, 123.05, 116.73, 115.67, 63.10, 51.55, 41.36, 35.39, 28.70, 24.95. HRMS (ESI) calculated C<sub>22</sub>H<sub>23</sub>ClN<sub>2</sub>O, [M+H]<sup>+</sup> = 367.1577, and measured [M+H]<sup>+</sup>: 367.1549

---

**1-(6-(3-chloropyridin-4-yl)-1,2,3,4-tetrahydroquinolin-1-yl)pent-4-en-1-one (S-17)**

**S-17** was prepared in a similar manner described for **S-16**. Yield: 75%. <sup>1</sup>H NMR (400 MHz, Chloroform-d) δ 8.67 (s, 1H), 8.51 (d, 1H), 7.35 – 7.23 (m, 4H), 5.84 (ddt, J = 16.8, 10.2, 6.5 Hz, 1H), 5.08 – 4.96 (m, 2H), 3.83 (t, J = 6.4 Hz, 2H), 2.81 (t, J = 6.7 Hz, 2H), 2.66 (t, J = 8.5, 6.4 Hz, 2H), 2.46 (dd, J = 8.7, 6.7 Hz, 2H), 2.02 (dt, J = 6.6 Hz, 2H). <sup>13</sup>C NMR (101 MHz, Chloroform-d) δ 172.21, 150.31, 147.97, 147.00, 139.69, 137.37, 133.06, 129.29, 126.84, 126.18, 126.09, 125.34, 124.67, 115.45, 43.75, 34.15, 29.82, 27.14, 24.08. HRMS (ESI) calculated C<sub>19</sub>H<sub>19</sub>ClN<sub>2</sub>O, [M+H]<sup>+</sup> = 327.1264, and measured [M+H]<sup>+</sup>: 327.1271

**1-(6-(3-chloropyridin-4-yl)-1,2,3,4-tetrahydroisoquinolin-2-yl)pent-4-en-1-one (S-18)**

**S-18** was prepared in a similar manner described for **S-16**. Yield: 78%. <sup>1</sup>H NMR (400 MHz, Chloroform-d) δ 8.70 (s, 1H), 8.56 (d, J = 4.5 Hz, 1H), 7.37 – 7.14 (m, 3H), 7.07 (t, J = 8.0 Hz, 1H), 5.89 (ddt, J = 15.7, 10.1, 4.5 Hz, 1H), 5.13 – 4.96 (m, 2H), 4.85 – 4.69 (m, 2H), 3.80 – 3.60 (m, 2H), 2.72 – 2.38 (m, 6H). <sup>13</sup>C NMR (101 MHz, Chloroform-d) δ 171.24, 149.68, 147.79, 147.34, 137.43, 135.93, 134.45, 132.14, 127.44, 127.03, 126.75, 126.64, 126.38, 115.32, 44.31, 42.93, 32.84, 29.14, 27.37. HRMS (ESI) calculated C<sub>19</sub>H<sub>19</sub>ClN<sub>2</sub>O, [M+H]<sup>+</sup> = 327.1264, and measured [M+H]<sup>+</sup>: 327.1271

**1-(5-(3-chloropyridin-4-yl)-2,3-dihydro-1H-indol-1-yl)hept-6-en-1-one (S-19)**

**S-19** was prepared in a similar manner described for **S-16**. Yield: 64%. <sup>1</sup>H NMR (400 MHz, Chloroform-d) δ 8.65 (s, 1H), 8.49 (d, J = 4.3 Hz, 1H), 8.34 (d, J = 8.3 Hz, 1H), 7.33 (s, 2H), 7.26 (d, J = 4.5 Hz, 1H), 5.83 (ddd, J = 16.8, 11.1, 5.6 Hz, 1H), 5.01 (dd, J = 26.0, 13.6 Hz, 2H), 4.12 (t, J = 8.5 Hz, 2H), 3.26 (t, J = 8.6 Hz, 2H), 2.46 (t, J = 7.6 Hz, 2H), 2.13 (dt, J = 7.3 Hz, 2H), 1.79 (tt, J = 7.8 Hz, 2H), 1.52 (tt, J = 7.6 Hz, 2H). <sup>13</sup>C NMR (101 MHz, Chloroform-d) δ 171.59, 150.21, 147.88, 147.40, 143.86, 138.54, 131.41, 130.16, 128.78, 125.99, 125.32, 125.19, 116.79, 114.78, 48.29, 35.84, 33.65, 28.65, 28.01, 24.07. HRMS (ESI) calculated C<sub>20</sub>H<sub>21</sub>ClN<sub>2</sub>O, [M+H]<sup>+</sup> = 341.1421, and measured [M+H]<sup>+</sup>: 341.1426

**1-(5-(3-chloropyridin-4-yl)-2,3-dihydro-1H-indol-1-yl)propan-1-one (S-20)**

**S-20** was prepared in a similar manner described for **S-16**. Yield: 89%. <sup>1</sup>H NMR (400 MHz,

---

Chloroform-d)  $\delta$  8.65 (s, 1H), 8.49 (d, J = 4.9 Hz, 1H), 8.34 (d, J = 8.5 Hz, 1H), 7.35 – 7.30 (m, 2H), 7.26 (d, J = 5.0 Hz, 1H), 4.12 (t, J = 8.5 Hz, 2H), 3.27 (t, J = 8.6 Hz, 2H), 2.48 (q, J = 7.4 Hz, 2H), 1.25 (t, J = 7.3 Hz, 3H).  $^{13}\text{C}$  NMR (101 MHz, Chloroform-d)  $\delta$  172.42, 150.29, 147.94, 147.49, 143.96, 131.62, 131.38, 130.25, 128.88, 125.39, 125.25, 116.81, 48.20, 29.31, 28.10, 8.81. HRMS (ESI) calculated  $\text{C}_{16}\text{H}_{15}\text{ClN}_2\text{O}$ ,  $[\text{M}+\text{H}]^+ = 287.0951$ , and measured  $[\text{M}+\text{H}]^+$ : 287.0959

**1-(5-(3-chloropyridin-4-yl)-2,3-dihydro-1H-indol-1-yl)pentan-1-one (S-21)**

**S-21** was prepared in a similar manner described for **S-16**. Yield: 90%.  $^1\text{H}$  NMR (400 MHz, Chloroform-d)  $\delta$  8.63 (s, 1H), 8.47 (d, J = 4.9 Hz, 1H), 8.33 (d, J = 8.6 Hz, 1H), 7.34 – 7.28 (m, 2H), 7.24 (d, J = 4.9 Hz, 1H), 4.10 (t, J = 8.5 Hz, 2H), 3.24 (t, J = 8.5 Hz, 2H), 2.43 (t, J = 7.4 Hz, 2H), 1.72 (tt, J = 7.6 Hz, 2H), 1.53 – 1.35 (m, 2H), 0.96 (t, J = 7.3 Hz, 3H).  $^{13}\text{C}$  NMR (101 MHz, Chloroform-d)  $\delta$  171.66, 150.07, 150.07, 147.77, 147.25, 143.79, 131.35, 130.00, 128.61, 125.20, 125.07, 116.60, 48.16, 35.60, 27.87, 26.56, 22.42, 13.89, 13.89. HRMS (ESI) calculated  $\text{C}_{18}\text{H}_{19}\text{ClN}_2\text{O}$ ,  $[\text{M}+\text{H}]^+ = 315.1264$ , and measured  $[\text{M}+\text{H}]^+$ : 315.1271

**(5-(3-chloropyridin-4-yl)-2,3-dihydro-1H-indol-1-yl)(tricyclo[3.3.1.1<sup>3,7</sup>]dec-1-yl)methanone (S-22)**

**S-22** was prepared in a similar manner described for **S-16**. Yield: 51%.  $^1\text{H}$  NMR (400 MHz, Chloroform-d)  $\delta$  8.64 (s, 1H), 8.48 (d, J = 5.0 Hz, 1H), 8.32 (d, J = 8.4 Hz, 1H), 7.33 (s, 1H), 7.31 (d, J = 8.6 Hz, 1H), 7.25 (d, J = 5.0 Hz, 1H), 4.40 (t, J = 8.1 Hz, 2H), 3.20 (t, J = 8.1 Hz, 2H), 2.20 – 2.08 (m, 9H), 1.77 (s, 6H).  $^{13}\text{C}$  NMR (101 MHz, Chloroform-d)  $\delta$  176.46, 150.13, 147.79, 147.42, 145.78, 131.58, 131.58, 130.97, 130.14, 128.48, 125.29, 124.80, 118.38, 49.83, 43.23, 38.30, 36.60, 29.44, 28.40. HRMS (ESI) calculated  $\text{C}_{24}\text{H}_{25}\text{ClN}_2\text{O}$ ,  $[\text{M}+\text{H}]^+ = 393.1734$ , and measured  $[\text{M}+\text{H}]^+$ : 393.1732

**1-(5-(3-chloropyridin-4-yl)-2,3-dihydro-1H-indol-1-yl)prop-2-en-1-one (S-23)**

**S-23** was prepared in a similar manner described for **S-16**. Yield: 47%.  $^1\text{H}$  NMR (400 MHz, Chloroform-d)  $\delta$  8.65 (s, 1H), 8.49 (d, J = 5.0 Hz, 1H), 8.38 (s, 1H), 7.37 – 7.31 (m, 2H), 7.27 (d, J = 5.4 Hz, 1H), 6.64 – 6.49 (m, 2H), 5.83 (dd, 1H), 4.24 (t, J = 8.5 Hz, 2H), 3.28 (t, J = 8.7 Hz, 2H).  $^{13}\text{C}$  NMR (101 MHz, Chloroform-d)  $\delta$  164.19, 150.23, 147.90, 147.36, 143.65, 143.61, 132.12, 131.91, 130.23, 129.52, 128.95, 128.84, 125.36, 117.33, 48.43, 28.01. HRMS (ESI) calculated  $\text{C}_{16}\text{H}_{13}\text{ClN}_2\text{O}$ ,

---

[M+H]<sup>+</sup> = 285.0795, and measured [M+H]<sup>+</sup>: 285.0792

**(5-(3-chloropyridin-4-yl)-2,3-dihydro-1H-indol-1-yl)(cyclohexyl)methanone (S-24)**

**S-24** was prepared in a similar manner described for **S-16**. Yield: 39%. <sup>1</sup>H NMR (400 MHz, Chloroform-d) δ 8.64 (s, 1H), 8.48 (d, J = 4.9 Hz, 1H), 8.36 (d, J = 7.5 Hz, 1H), 7.35 – 7.29 (m, 2H), 7.25 (d, J = 4.9 Hz, 1H), 4.20 (t, J = 8.5 Hz, 2H), 3.26 (t, J = 8.5 Hz, 2H), 2.49 (t, J = 11.5 Hz, 1H), 1.92 – 1.81 (m, 4H), 1.76 – 1.57 (m, 3H), 1.39 – 1.26 (m, 3H). <sup>13</sup>C NMR (101 MHz, Chloroform-d) δ 175.08, 150.24, 150.24, 147.91, 147.45, 144.12, 131.61, 130.22, 128.79, 125.36, 125.18, 117.17, 48.20, 44.02, 29.16, 28.08, 25.89, 25.87. HRMS (ESI) calculated C<sub>20</sub>H<sub>21</sub>ClN<sub>2</sub>O, [M+H]<sup>+</sup> = 341.1421, and measured [M+H]<sup>+</sup>: 341.1418

**4-(5-(3-chloropyridin-4-yl)-2,3-dihydro-1H-indol-1-yl)-4-oxobutanenitrile (S-25)**

**S-25** was prepared in a similar manner described for **S-16**. Yield: 24%. <sup>1</sup>H NMR (400 MHz, Chloroform-d) δ 8.66 (s, 1H), 8.50 (d, J = 4.9 Hz, 1H), 8.29 (d, J = 8.2 Hz, 1H), 7.37 – 7.32 (m, 2H), 7.26 (d, J = 4.7 Hz, 1H), 4.12 (t, J = 8.4 Hz, 2H), 3.32 (t, J = 8.4 Hz, 2H), 2.87 – 2.77 (m, 4H). <sup>13</sup>C NMR (101 MHz, Chloroform-d) δ 167.18, 150.32, 148.00, 147.26, 143.22, 132.48, 131.39, 130.24, 128.99, 125.44, 125.36, 119.21, 116.93, 48.14, 31.79, 28.10, 12.76. HRMS (ESI) calculated C<sub>18</sub>H<sub>15</sub>ClN<sub>2</sub>O, [M+H]<sup>+</sup> = 312.0904, and measured [M+H]<sup>+</sup>: 312.0898

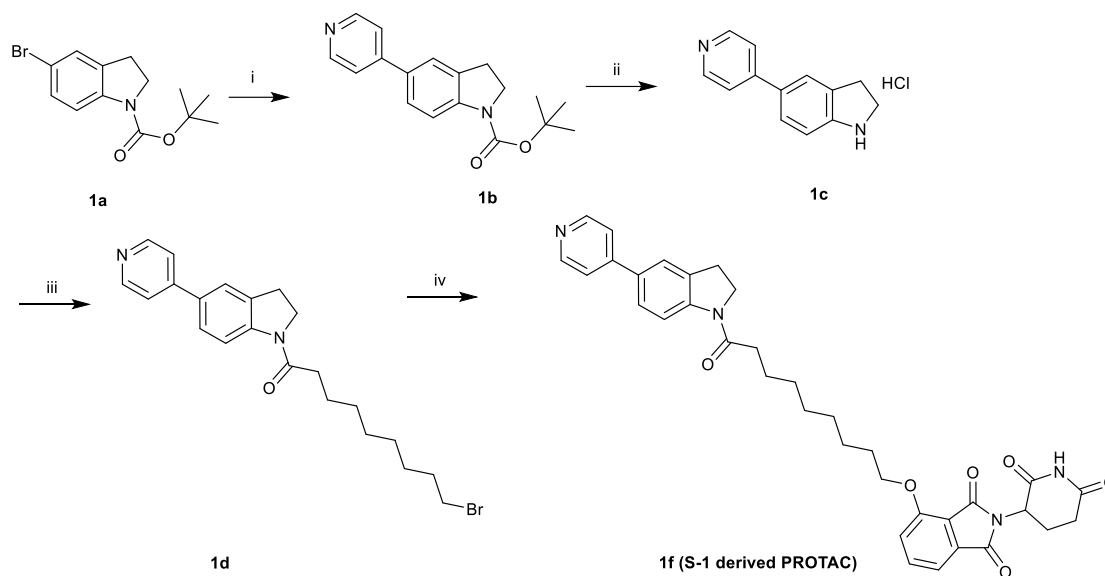

### Scheme S3: synthesis of S-1 derived PROTAC.

Reagents and conditions: (i) pyridine-4-boronic acid pinacol ester,  $K_2CO_3$ ,  $Pd(PPh_3)_4$ , dioxane/water = 4:1, 90 °C, overnight; (ii) 1M HCl in dioxane, R.T., 3 h; (iii) 9-bromononanoic acid, HATU, DIPEA, DCM, R.T., 3 h; (iv) 4-hydroxythalidomide,  $NaHCO_3$ , KI, MeCN, 60 °C, overnight

#### **tert-butyl 5-(pyridin-4-yl)-2,3-dihydroindole-1-carboxylate (1b)**

To a mixture of the *tert*-butyl 5-bromo-2,3-dihydroindole-1-carboxylate (**1a**) (1.2 g, 1.0 equiv), potassium carbonate ( $K_2CO_3$ , 1.6 g, 3.0 equiv), and pyridine-4-boronic acid pinacol ester (0.8 g, 1.0 equiv) in a solvent mixture of dioxane and water (4:1), triphenylphosphine palladium (0.5 g, 0.1 equiv) was added under a nitrogen atmosphere. The reaction was heated to 90 °C and stirred for 12 hours, after which it was allowed to reach room temperature. Then 100 mL water and ethyl acetate (100 mL×3) were added for extraction. The combined organic layers were washed with brine and dried over anhydrous sodium sulfate. Concentrated under vacuum to give the crude product *tert*-butyl 5-(pyridin-4-yl)-2,3-dihydroindole-1-carboxylate (**1b**) as yellow solid (1.06g, 90%).  $^1H$  NMR (400 MHz, Chloroform- $d$ )  $\delta$  8.60 (d,  $J$  = 5.3 Hz, 2H), 7.90 (s, 1H), 7.49 – 7.39 (m, 4H), 4.02 (t,  $J$  = 8.7 Hz, 2H), 3.13 (t,  $J$  = 8.7 Hz, 2H), 1.58 (s, 9H).  $^{13}C$  NMR (101 MHz, Chloroform- $d$ )  $\delta$  152.46, 150.19, 150.19, 148.04, 131.86, 126.50, 126.50, 123.21, 121.09, 121.09, 115.03, 115.03, 77.97, 47.94, 29.29, 28.48. HRMS (ESI) calculated  $C_{18}H_{20}N_2O_2$ ,  $[M+H]^+$  = 297.1603, and measured  $[M+H]^+$ : 297.1589

#### **9-bromo-1-(5-(pyridin-4-yl)indolin-1-yl)nonan-1-one (1d)**

To a mixture of the intermediate product (**1b**), the 1M hydrochloric acid in dioxane was dropwise to the system for 10 min. Continued stirring the mixture until the yellow color disappeared and a white suspension formed. Evaporated the solvent under reduced pressure and dried the residue under vacuum to get the crude product 5-pyridin-4-yl-2,3-dihydroindole hydrochloride (**1c**) as

---

yellow solid, which was used in the next step without further purification. To a mixture of the intermediate product (**1c**), HATU ( 1.6 g, 1.2 equiv) and 9-bromononanoic acid (0.8 g, 1.0 equiv) in a solvent mixture of DCM (20 ml), DIPEA (0.5 g, 3.0 equiv) was added under a nitrogen atmosphere. The reaction was stirred at room temperature for 2 hours. Then 100 mL water and ethyl acetate (100 mL×3) were added for extraction. The combined organic layers were washed with brine and dried over anhydrous sodium sulfate. Concentrated under vacuum and purified on silica gel via petroleum ether : ethyl acetate = 2 : 1 to give product 9-bromo-1-(5-(pyridin-4-yl)indolin-1-yl)nonan-1-one (**1d**) as yellow solid (1.13 g, 76%). <sup>1</sup>H NMR (400 MHz, Chloroform-d) δ 8.58 (d, J = 5.5 Hz, 2H), 8.30 (d, J = 8.4 Hz, 1H), 7.48 – 7.41 (m, 4H), 4.07 (t, J = 8.5 Hz, 2H), 3.37 (t, J = 6.8 Hz, 2H), 3.22 (t, J = 8.5 Hz, 2H), 2.40 (t, J = 7.4 Hz, 2H), 1.83 (p, J = 6.9 Hz, 2H), 1.72 (p, J = 7.4 Hz, 2H), 1.46 – 1.27 (m, 8H). <sup>13</sup>C NMR (101 MHz, Chloroform-d) δ 171.63, 150.25, 150.25, 147.87, 144.17, 133.11, 132.22, 126.62, 122.99, 121.15, 121.15, 117.27, 48.28, 35.93, 34.05, 32.81, 29.33, 29.28, 28.64, 28.14, 27.97, 24.46. HRMS (ESI) calculated C<sub>22</sub>H<sub>27</sub>BrN<sub>2</sub>O, [M+H]<sup>+</sup> = 415.1385, and measured [M+H]<sup>+</sup>: 415.1383

**2-(2,6-dioxopiperidin-3-yl)-4-((9-oxo-9-(5-(pyridin-4-yl)-2,3-dihydro-1H-indol-1-yl)nonyl)oxy)-1H-isoindole-1,3(2H)-dione (S-1 derived PROTAC, **1f**)**

To a mixture of the 9-bromo-1-(5-(pyridin-4-yl)indolin-1-yl)nonan-1-one (**1d**) (0.31 g, 1.0 equiv), NaHCO<sub>3</sub> ( 186 mg, 3 equiv) and KI (24 mg, 0.2 equiv) in a solvent mixture of MeCN (20 ml), 4-hydroxythalidomide (220 mg, 1.1 equiv) was added slowly. The reaction was stirred at 60 °C overnight. Then 100 mL water and ethyl acetate (100 mL×3) were added for extraction. The combined organic layers were washed with brine and dried over anhydrous sodium sulfate. Concentrated under vacuum and purified on silica gel via petroleum ether : ethyl acetate = 1 : 1 to give product 9-bromo-1-(5-(pyridin-4-yl)indolin-1-yl)nonan-1-one (**1d**) as yellow solid (0.27 g, 61%). <sup>1</sup>H NMR (400 MHz, DMSO-d<sub>6</sub>) δ 11.10 (s, 1H), 8.58 (d, J = 6.1 Hz, 2H), 8.17 (d, J = 8.4 Hz, 1H), 7.81 (dd, J = 8.5, 7.2 Hz, 1H), 7.70 (s, 1H), 7.68 – 7.66 (m, 2H), 7.64 (dd, J = 8.4, 2.0 Hz, 1H), 7.51 (d, J = 8.6 Hz, 1H), 7.44 (d, J = 7.3 Hz, 1H), 5.08 (dd, J = 12.9, 5.4 Hz, 1H), 4.21 (t, J = 6.4 Hz, 2H), 4.14 (t, J = 8.6 Hz, 2H), 3.21 (t, J = 8.6 Hz, 2H), 2.65 – 2.52 (m, 2H), 2.52 – 2.50 (m, 4H), 2.46 (t, J = 7.3 Hz, 2H), 1.77 (tt, J = 10.9, 6.7, 5.1 Hz, 2H), 1.61 (t, J = 7.0 Hz, 2H), 1.48 (t, J = 7.4 Hz, 2H), 1.37 – 1.34 (m, 4H). <sup>13</sup>C NMR (101 MHz, DMSO-d<sub>6</sub>) δ 172.74, 171.30, 169.91, 166.83, 165.28, 156.02, 150.10, 146.62, 144.14, 136.99, 133.23, 132.95, 131.53, 125.89, 123.04, 120.58, 119.78, 116.22, 116.07, 115.10, 68.81, 48.73, 47.70, 34.87, 30.93, 28.83, 28.59, 28.57, 28.39, 27.31, 25.24, 23.90, 21.99. HRMS (ESI) calculated C<sub>35</sub>H<sub>36</sub>N<sub>4</sub>O<sub>6</sub>, [M+H]<sup>+</sup> = 609.2713, and measured [M+H]<sup>+</sup>: 609.2714

---

## Materials and Methods

### Cell Culture and CCK-8 Assay Methods

MO3.13 and HMC3 cells were cultured in Dulbecco's Modified Eagle Medium (DMEM) supplemented with 10% fetal bovine serum (FBS), 1% penicillin-streptomycin, and 1% L-glutamine. Cells were maintained in a humidified incubator at 37°C with 5% CO<sub>2</sub>. The medium was changed every 2-3 days. For the Cell Counting Kit-8 (CCK-8) assay, MO3.13 and HMC3 cells were seeded into 96-well plates at a density of 5,000 cells per well in 100 µL of culture medium. After an overnight incubation to allow cell attachment, various treatments were applied according to the experimental design. Following the treatment period, 10 µL of CCK-8 solution (Dojindo Molecular Technologies) was added to each well. The plates were then incubated for an additional 2 hours at 37°C with 5% CO<sub>2</sub>. Absorbance was measured at 450 nm using a microplate reader. All experiments were performed in triplicate, and data were expressed as mean ± standard deviation (SD).

### SARM1 Protein Expression Method

The active truncated human SARM1 protein (412-724) was cloned into the pET-28a(+) vector, resulting in a construct with an N-terminal 6xHis-tag. This construct was transformed into *E. coli* BL21 (DE3) cells, which were grown at 37°C until the optical density at 600 nm (OD<sub>600</sub>) reached 0.6-0.8. The culture temperature was then reduced to 16°C, and protein expression was induced by adding 0.5 mM IPTG. The cells were grown overnight for approximately 18 hours before being harvested by centrifugation at 4,000 x g for 10 minutes at 4°C. The cell pellets were resuspended in lysis buffer (50 mM hepes, pH 8.0, 300 mM NaCl, 1 mM phenylmethylsulfonyl fluoride (PMSF), and 5% Triton X-100). The cells were lysated and then clarified by centrifugation at 20,000 x g for 30 minutes at 4°C. The supernatant was then applied to a nickel-nitrilotriacetic acid (Ni-NTA) affinity column pre-equilibrated with the lysis buffer. The column was washed with 10 column volumes (CVs) of wash buffer (50 mM hepes, pH 8.0, 300 mM NaCl, 5% Triton X-100, and 50 mM imidazole) to remove non-specifically bound proteins. The SARM1 protein was eluted using an elution buffer containing 50 mM hepes, pH 8.0, 300 mM NaCl, 5% Triton X-100 and 300 mM imidazole. Elution fractions containing the SARM1 protein were identified by SDS-PAGE. The protein was then subjected to size-exclusion chromatography (SEC) using a Superdex 200 Increase 10/300 GL column (GE Healthcare) pre-equilibrated with the elution buffer. Peak fractions containing the SARM1 protein were collected, and stored at -80°C in 10ml aliquots.

## Supplementary Tables and Figures

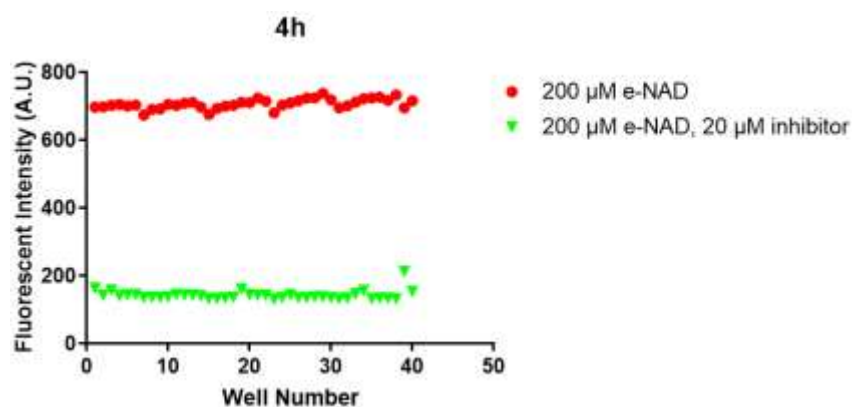

**Figure S1A:** High-throughput screening methodology. 200  $\mu\text{M}$  1,N6-Ethano-NAD (e-NAD) and 40  $\mu\text{g/ml}$  active truncated human SARM1 protein (412-724) was incubated for 2h as positive control. 200  $\mu\text{M}$  1,N6-Ethano-NAD (e-NAD), 20  $\mu\text{M}$  DSRM-3716 and 40  $\mu\text{g/ml}$  active truncated human SARM1 protein (412-724) was incubated for 2h as negative control.

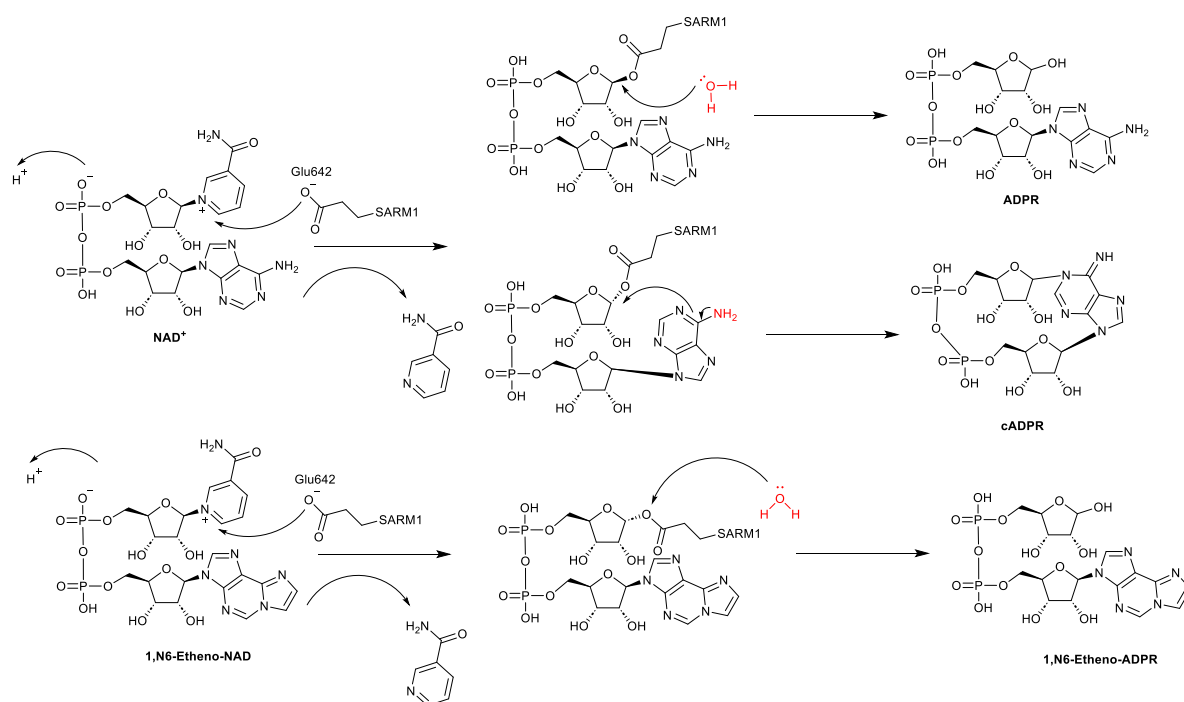

**Figure S1B:** Enzymatic Assay Details and Reaction Scheme of ADPR, cADPR, and 1,N6-Ethano-NAD Production



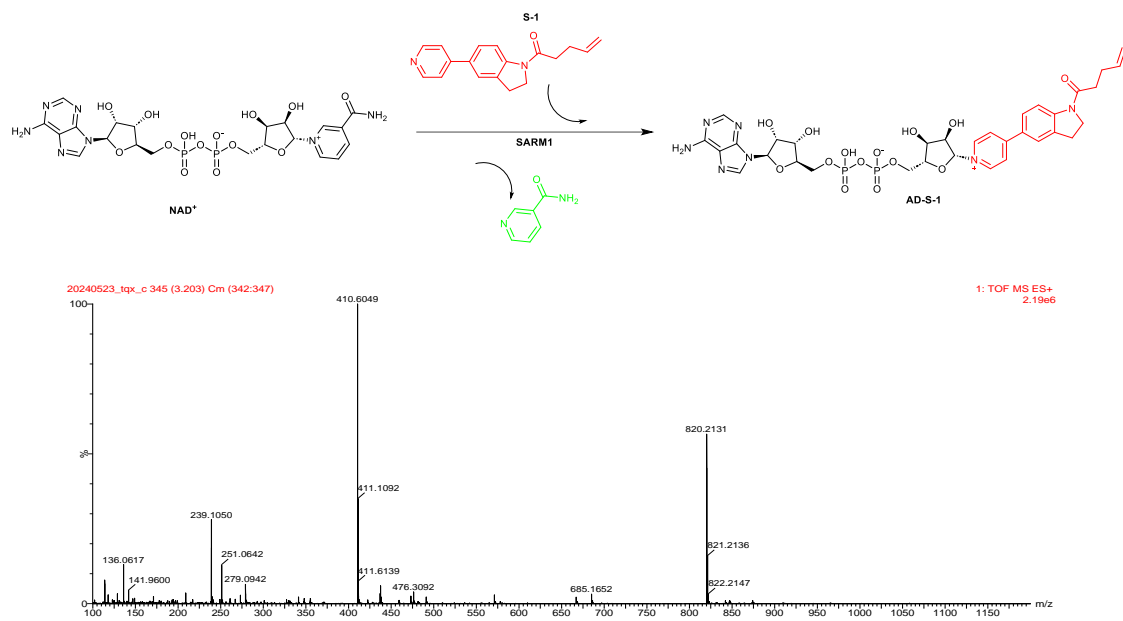

**Figure S2:** Schematic Diagram and High-Resolution Mass Spectrometry Analysis of the Reaction Product AD-S-1. HRMS (ESI) calculated  $C_{33}H_{39}N_7O_{14}P_2$ ,  $[M+H]^+ = 820.2108$ , and measured  $[M+H]^+ : 820.2131$

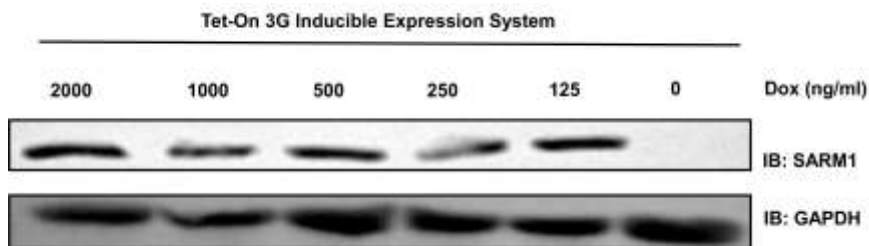

**Figure S3:** Expression Levels of SARM1 in a Tet-On 3G Inducible Expression System Across Different Doxycycline (Dox) Concentrations

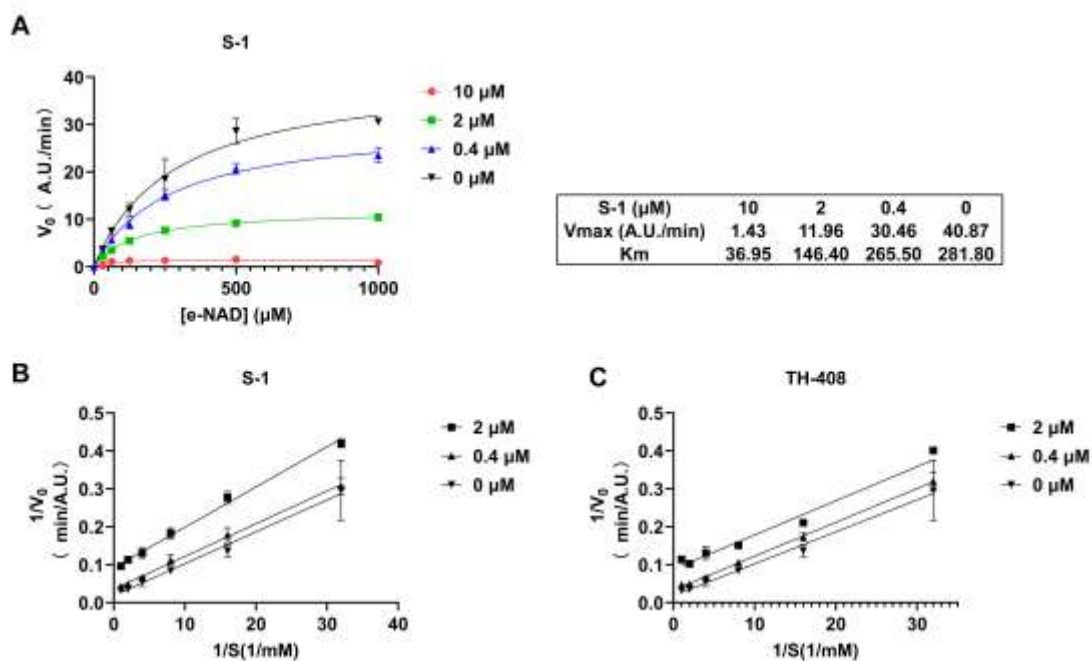

**Figure S4:** Enzyme Kinetic Studies of **S-1** and **TH408** Showing Uncompetitive Inhibition Mechanism.

(A) Michaelis-Menten curves for the lead compound **S-1** at various concentrations (0, 0.4, 2, and 10  $\mu\text{M}$ ) are shown. (B) Lineweaver-Burk plot for **S-1** at concentrations of 0, 0.4, and 2  $\mu\text{M}$ . (C) Lineweaver-Burk plot for **TH408** at concentrations of 0, 0.4, and 2  $\mu\text{M}$ .

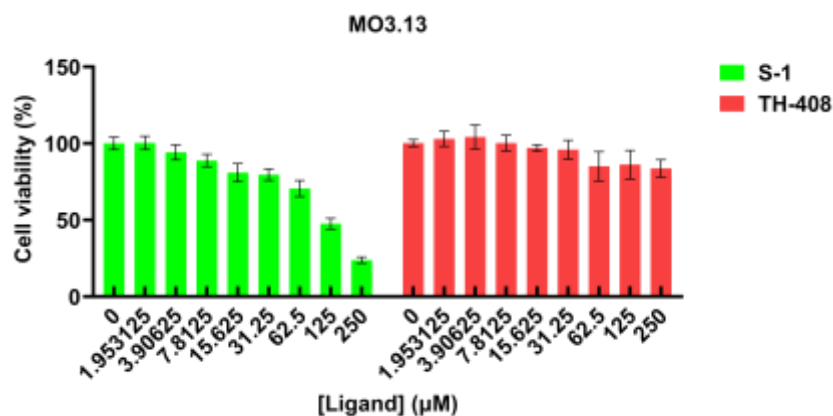

**Figure S5:** Cytotoxicity evaluation of the molecules.

---

**Table S1:** Compound SMILES strings

|        |                                                                                                |
|--------|------------------------------------------------------------------------------------------------|
| S-1    | <chem>O=C(CCC=C)N1C2=CC=C(C3=CC=NC=C3)C=C2CC1</chem>                                           |
| S-2    | <chem>O=C(CCC=C)N1C2=CC=C(C3=CC=CN=C3)C=C2CC1</chem>                                           |
| S-3    | <chem>O=C(CCC=C)N1C2=CC=C(C3=C(OC)C=CN=C3)C=C2CC1</chem>                                       |
| S-4    | <chem>O=C(CCC=C)N1C2=CC=C(C3=CC(C)=NC=C3)C=C2CC1</chem>                                        |
| S-5    | <chem>O=C(CCC=C)N1C2=CC=C(C3=CC(C)=NC(C)=C3)C=C2CC1</chem>                                     |
| S-6    | <chem>O=C(CCC=C)N1C2=CC=C(C3=CC(C(F)(F)F)=NC=C3)C=C2CC1</chem>                                 |
| S-7    | <chem>O=C(CCC=C)N1C2=CC=C(C3=CC(OC)=CN=C3)C=C2CC1</chem>                                       |
| S-8    | <chem>O=C(CCC=C)N1C2=CC=C(C3=CC(Cl)=NC=C3)C=C2CC1</chem>                                       |
| TH-408 | <chem>O=C(CCC=C)N1C2=CC=C(C3=C(Cl)C=NC=C3)C=C2CC1</chem>                                       |
| S-9    | <chem>FC(C=NC=C1)=C1C2=CC=C(N(C(CCC=C)O)CC3)C3=C2</chem>                                       |
| S-10   | <chem>O=C(CCC=C)N1C2=CC=C(C3=C(C(F)(F)F)C=NC=C3)C=C2CC1</chem>                                 |
| S-11   | <chem>O=C(CCC=C)N1C2=CC=C(C3=C([N+])([O-])=O)C=NC=C3)C=C2CC1</chem>                            |
| S-12   | <chem>O=C(CCC=C)N1C2=CC=C(C3=C(OC)C=NC=C3)C=C2CC1</chem>                                       |
| S-13   | <chem>O=C(N1C2=CC=CC(C3=C(Cl)C=NC=C3)=C2CC1)CCC=C</chem>                                       |
| S-14   | <chem>O=C(N1C2=CC(C3=C(Cl)C=NC=C3)=CC=C2CC1)CCC=C</chem>                                       |
| S-15   | <chem>ClC(C=NC=C1)=C1C2=C(N(C(CCC=C)O)CC3)C3=CC=C2</chem>                                      |
| S-16   | <chem>C=CCCC(N1CC2(C3=CC(C4=CC=NC=C4Cl)=CC=C31)CCCC2)=O</chem>                                 |
| S-17   | <chem>O=C(CCC=C)N1C2=CC=C(C=C2CCC1)C3=C(C=NC=C3)Cl</chem>                                      |
| S-18   | <chem>O=C(N1CC2=CC=C(C3=C(Cl)C=NC=C3)C=C2CC1)CCC=C</chem>                                      |
| S-19   | <chem>O=C(N1C2=CC=C(C3=C(Cl)C=NC=C3)C=C2CC1)CCCC=C</chem>                                      |
| S-20   | <chem>O=C(CC)N1C2=CC=C(C3=C(Cl)C=NC=C3)C=C2CC1</chem>                                          |
| S-21   | <chem>O=C(CCCC)N1C2=CC=C(C3=C(Cl)C=NC=C3)C=C2CC1</chem>                                        |
| S-22   | <chem>O=C(C12CC3CC(C2)CC(C1)C3)N4C5=CC=C(C6=C(Cl)C=NC=C6)C=C5CC4</chem>                        |
| S-23   | <chem>O=C(C=C)N1C2=CC=C(C3=C(Cl)C=NC=C3)C=C2CC1</chem>                                         |
| S-24   | <chem>O=C(C1CCCCC1)N2C3=CC=C(C4=C(Cl)C=NC=C4)C=C3CC2</chem>                                    |
| S-25   | <chem>O=C(C1CCCCC1)N2C3=CC=C(C4=C(Cl)C=NC=C4)C=C3CC2</chem>                                    |
| 1b     | <chem>O=C(OC(C)(C)C)N1C2=CC=C(C3=CC=NC=C3)C=C2CC1</chem>                                       |
| 1d     | <chem>O=C(N1C2=CC=C(C=C2CC1)C3=CC=NC=C3)CCCCCCCCBr</chem>                                      |
| PROTAC | <chem>O=C(N1C2=CC=C(C=C2CC1)C3=CC=NC=C3)CCCCCCCCOC4=CC=CC(C(N5C6CCC(NC6=O)=O)=O)=C4C5=O</chem> |

**Table S2:** Introduction of Life Chemicals- Pre-plated Diversity Sets

| Diversity Set | Average values |      |      |       |      |      |       |          |
|---------------|----------------|------|------|-------|------|------|-------|----------|
|               | MW             | HbD  | HbAc | cLogP | RotB | Fsp3 | PSA   | Tanimoto |
| 50K           | 357.29         | 1.38 | 3.77 | 2.51  | 4.91 | 0.35 | 93.67 | 0.79     |
| 20K           | 355.04         | 1.39 | 3.77 | 2.42  | 4.78 | 0.35 | 93.06 | 0.74     |
| 15K           | 357.53         | 1.40 | 3.77 | 2.48  | 4.94 | 0.36 | 91.34 | 0.76     |
| 10K           | 359.44         | 1.38 | 3.76 | 2.59  | 5.02 | 0.35 | 90.06 | 0.78     |
| 5K            | 361.31         | 1.34 | 3.78 | 2.76  | 5.11 | 0.33 | 88.52 | 0.80     |

| Diversity Set | Number of compounds | Number of Scaffolds | Number of Scaffold-based compounds | Number of Singletons |
|---------------|---------------------|---------------------|------------------------------------|----------------------|
| 50K           | 50,240              | 2,242               | 42,283                             | 7,957                |
| 20K           | 20,160              | 1,847               | 17,974                             | 2,186                |
| 15K           | 15,040              | 1,947               | 12,904                             | 2,136                |
| 10K           | 9,920               | 1,813               | 7,893                              | 2,027                |
| 5K            | 5,120               | 1,413               | 3,378                              | 1,742                |

The "life chemicals pre-plated diversity sets" originate from the Active Screening Platform at the Center for Pharmaceutical Technology, Tsinghua University, which is a commercial library. Provided by Life Chemicals, these sets are a series of pre-formulated compound diversity collections. These collections encompass up to 50,000 novel compounds, selected for their optimal physicochemical properties, making them a rich resource for high-throughput screening initiatives.



Spectra of  $^1\text{H-NMR}$  and  $^{13}\text{C-NMR}$  of 1-(5-(pyridin-3-yl)-2,3-dihydro-1H-indol-1-yl)pent-4-en-1-one

(S-2)

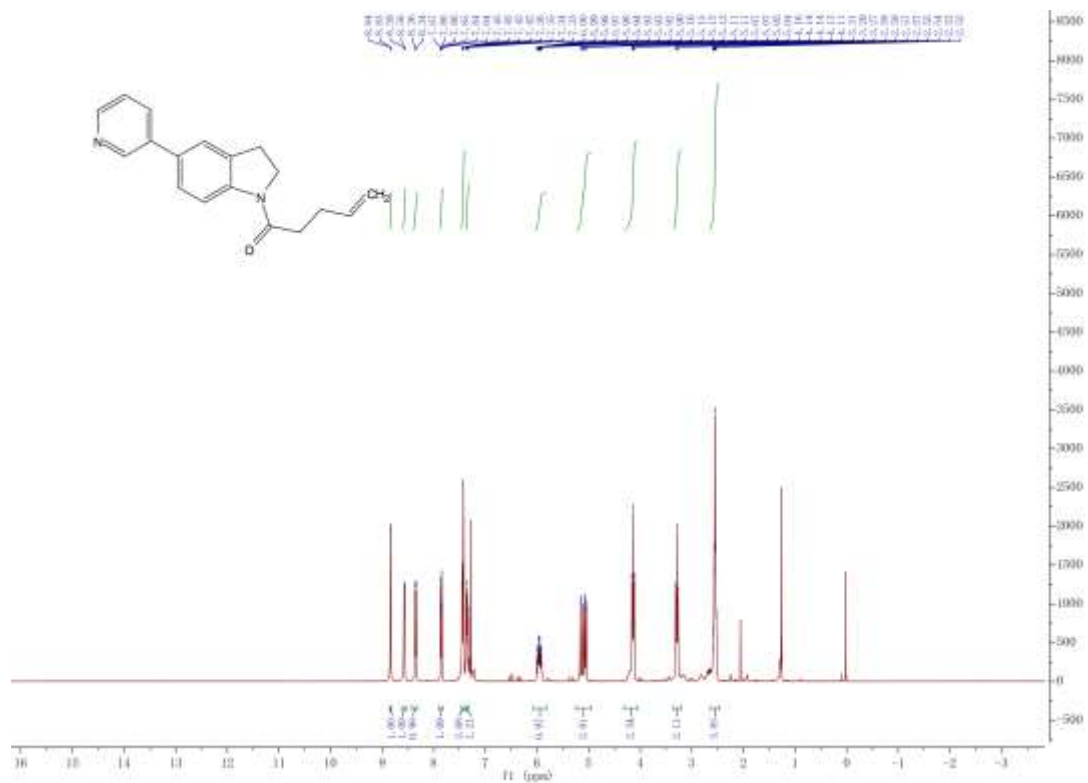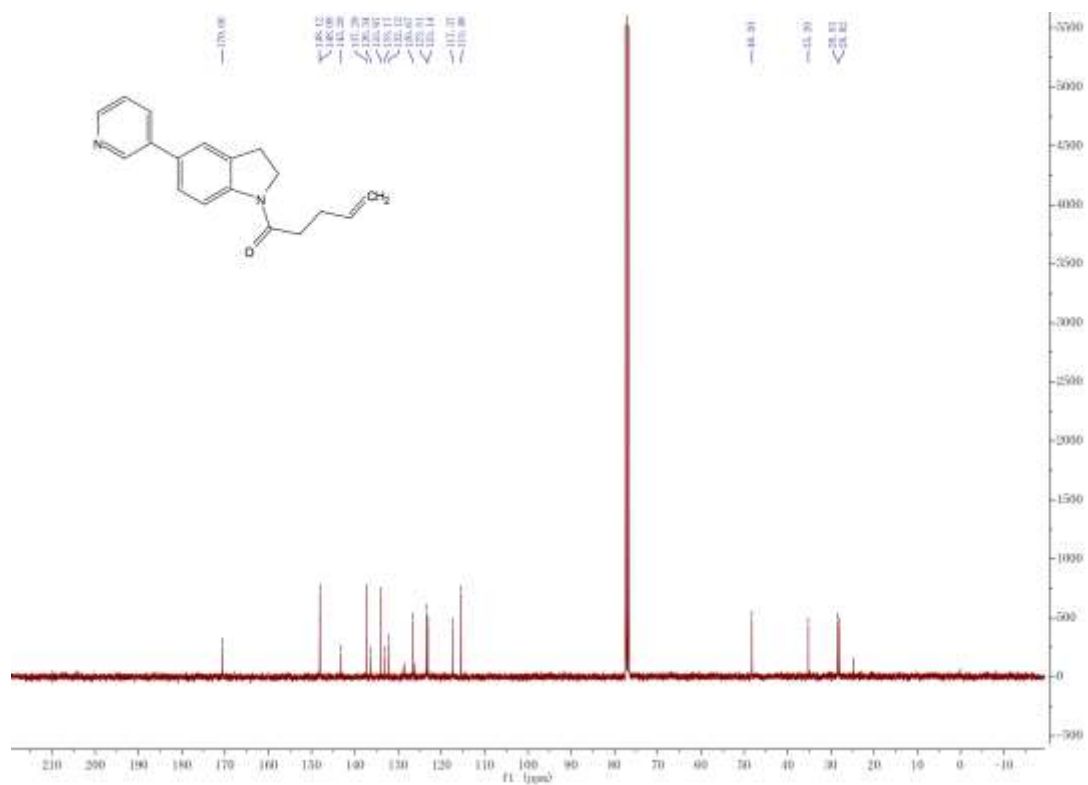

Spectra of  $^1\text{H-NMR}$  and  $^{13}\text{C-NMR}$  of 1-(5-(4-methoxypyridin-3-yl)-2,3-dihydro-1H-indol-1-yl)pent-4-en-1-one (S-3)

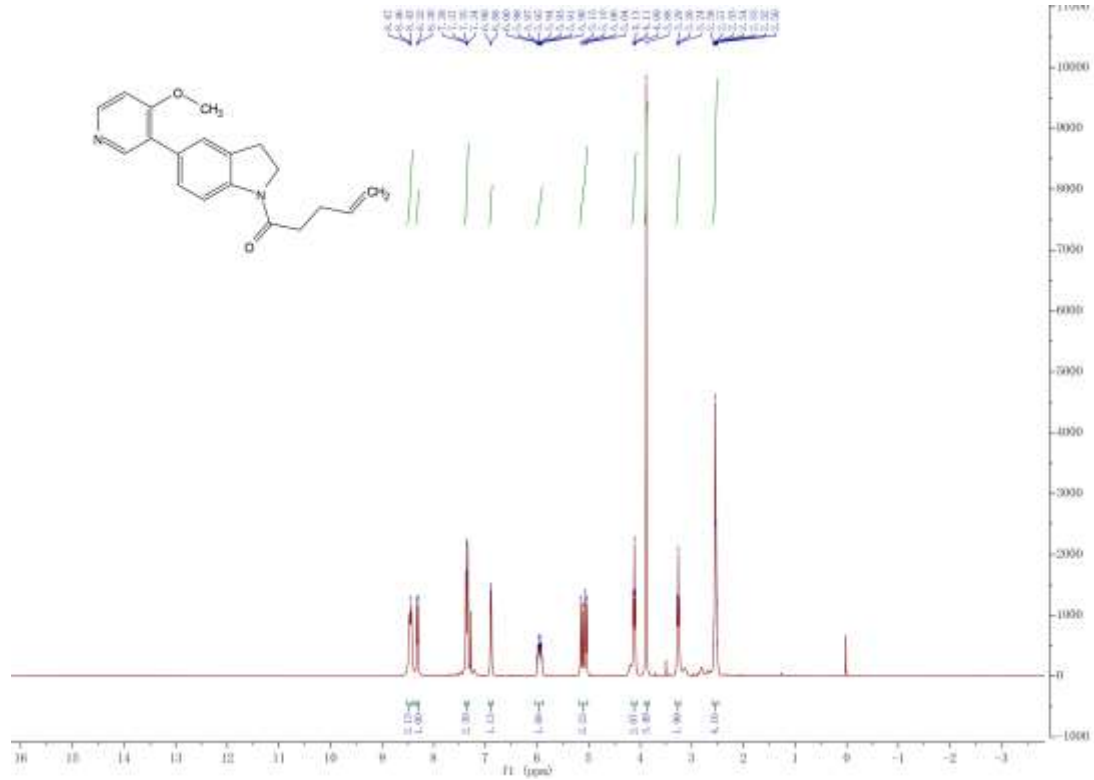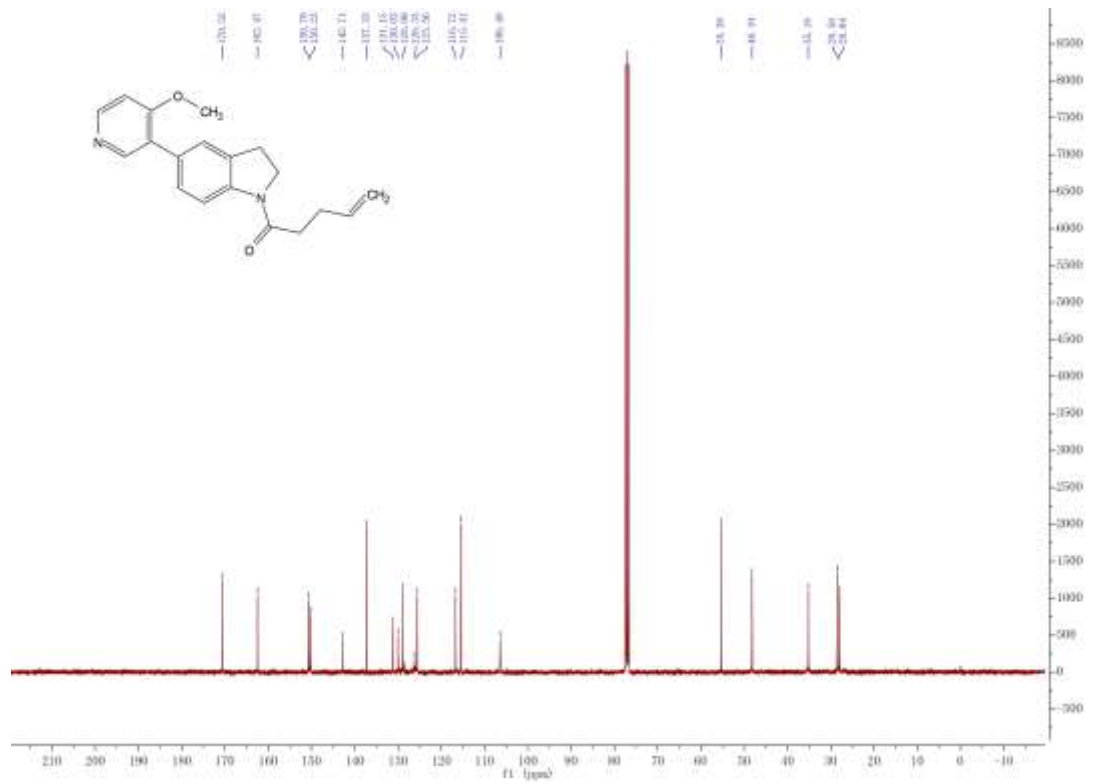

Spectra of  $^1\text{H-NMR}$  and  $^{13}\text{C-NMR}$  of 1-(5-(2-methylpyridin-4-yl)-2,3-dihydro-1H-indol-1-yl)pent-4-en-1-one (S-4)

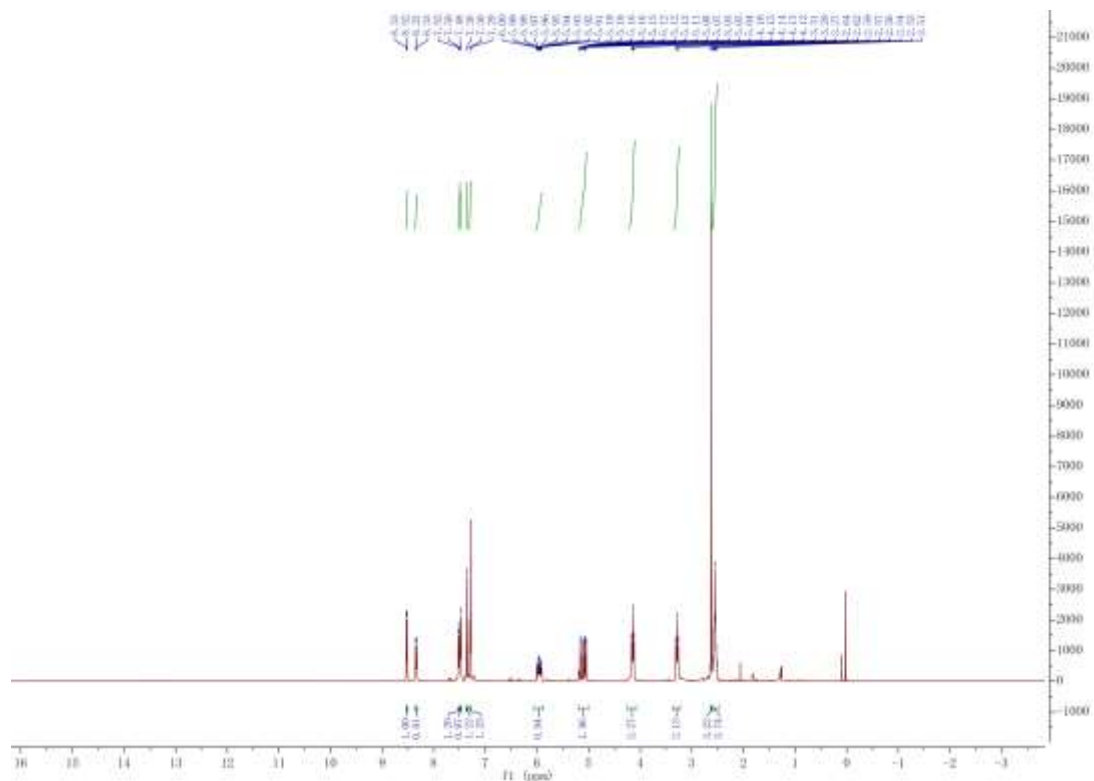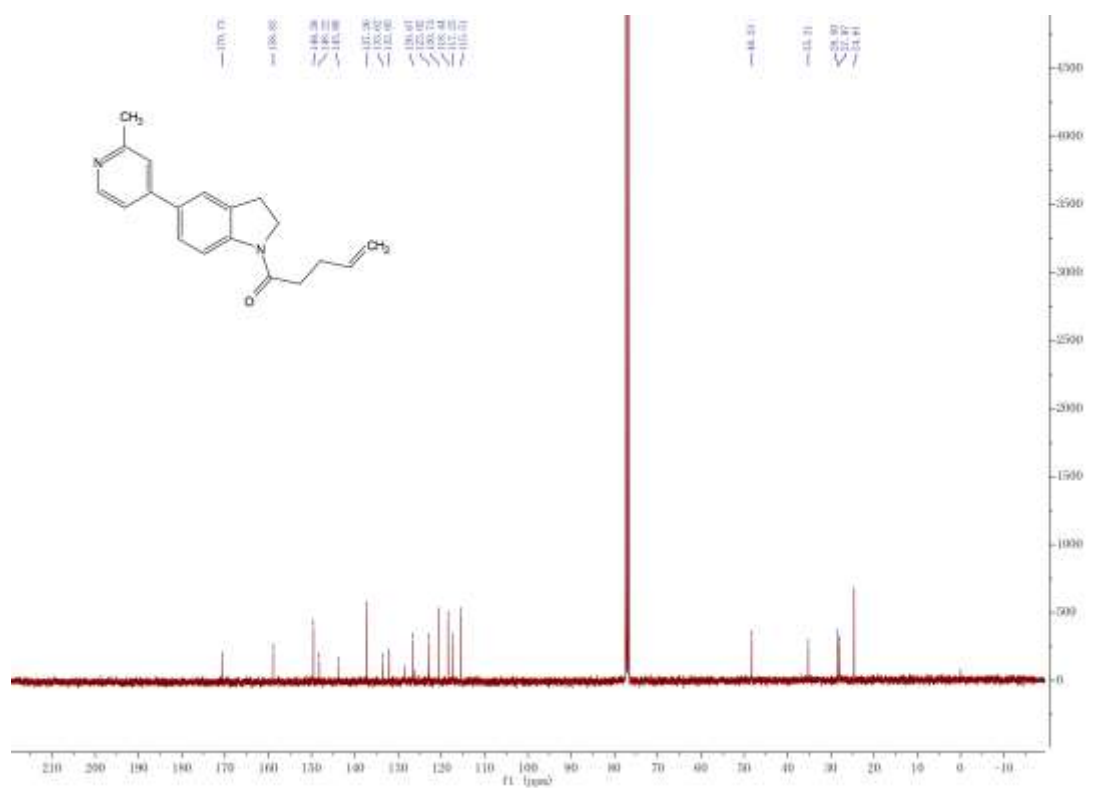





Spectra of  $^1\text{H}$ -NMR and  $^{13}\text{C}$ -NMR of 1-(5-(2-(trifluoromethyl)pyridin-4-yl)-2,3-dihydro-1H-indol-1-yl)pent-4-en-1-one (S-6)

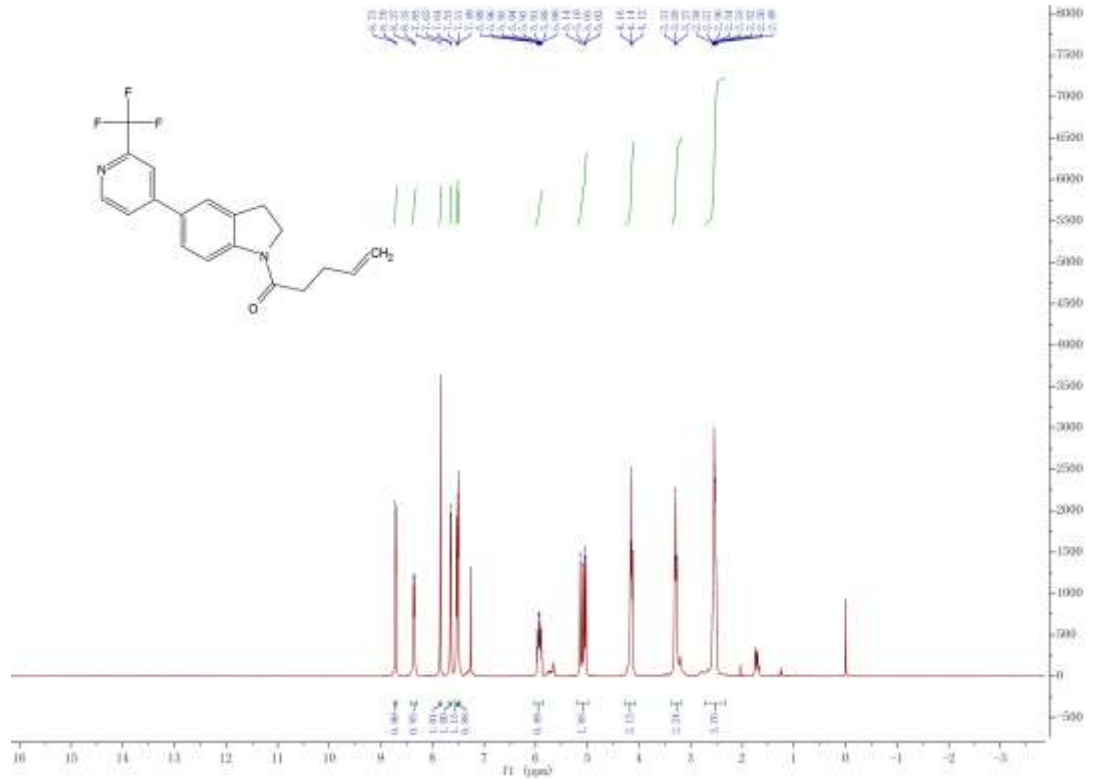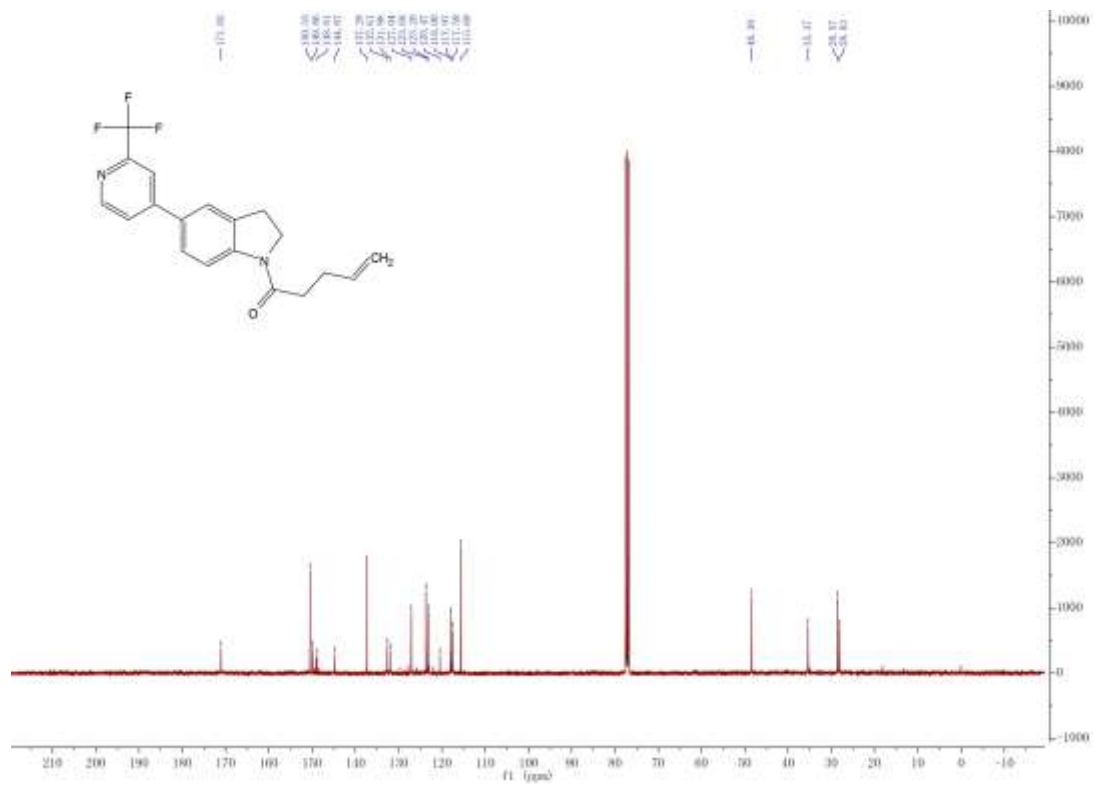

Spectra of  $^1\text{H-NMR}$  and  $^{13}\text{C-NMR}$  of 1-(5-(5-methoxypyridin-3-yl)-2,3-dihydro-1H-indol-1-yl)pent-4-en-1-one (S-7)

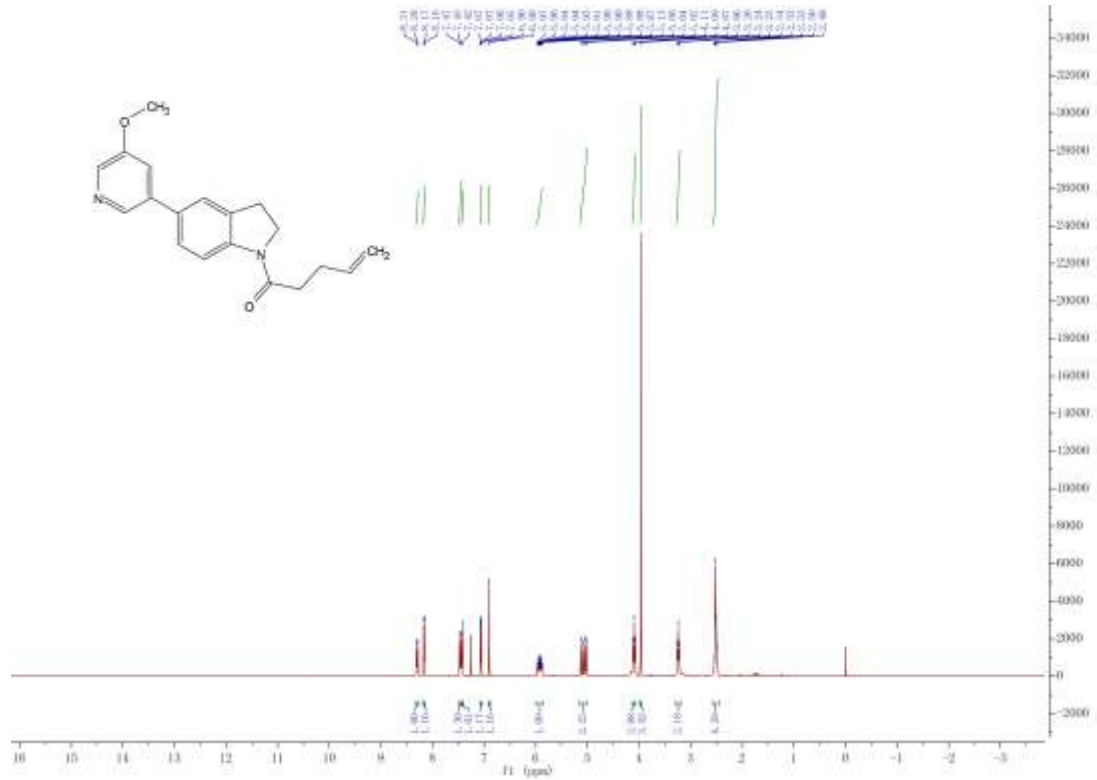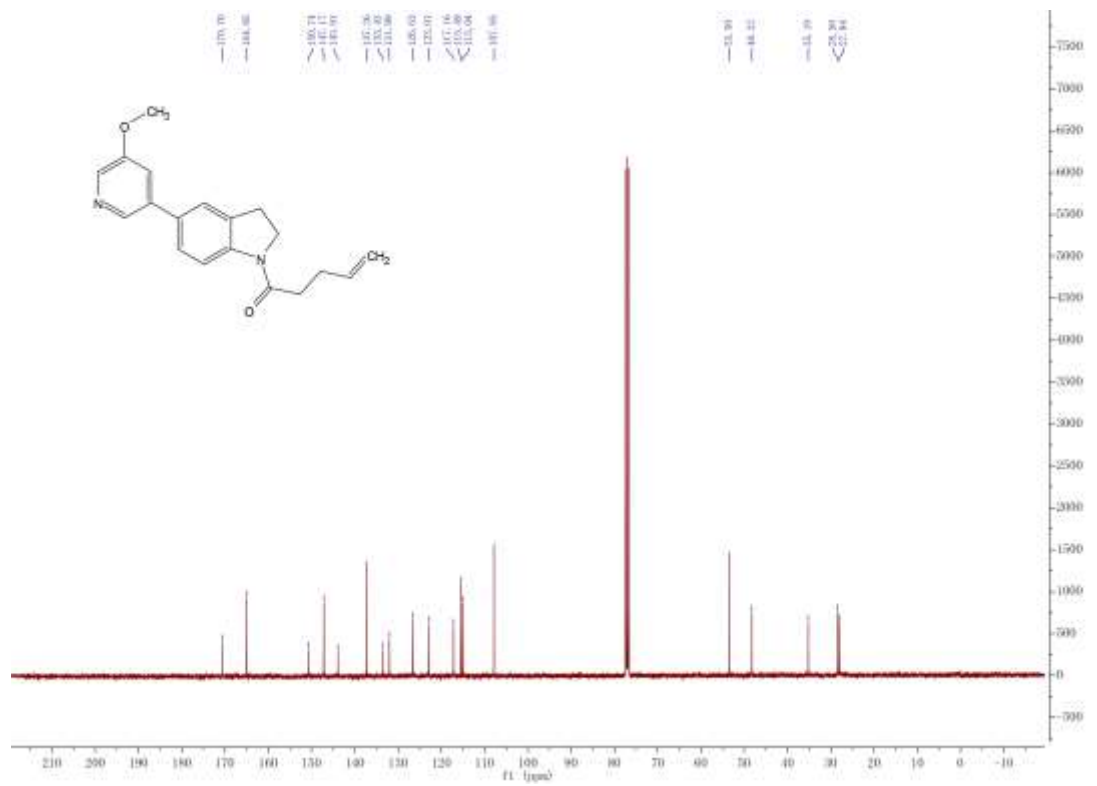





Spectra of  $^1\text{H-NMR}$  and  $^{13}\text{C-NMR}$  of 1-(5-(3-fluoropyridin-4-yl)-2,3-dihydro-1H-indol-1-yl)pent-4-en-1-one (S-9)

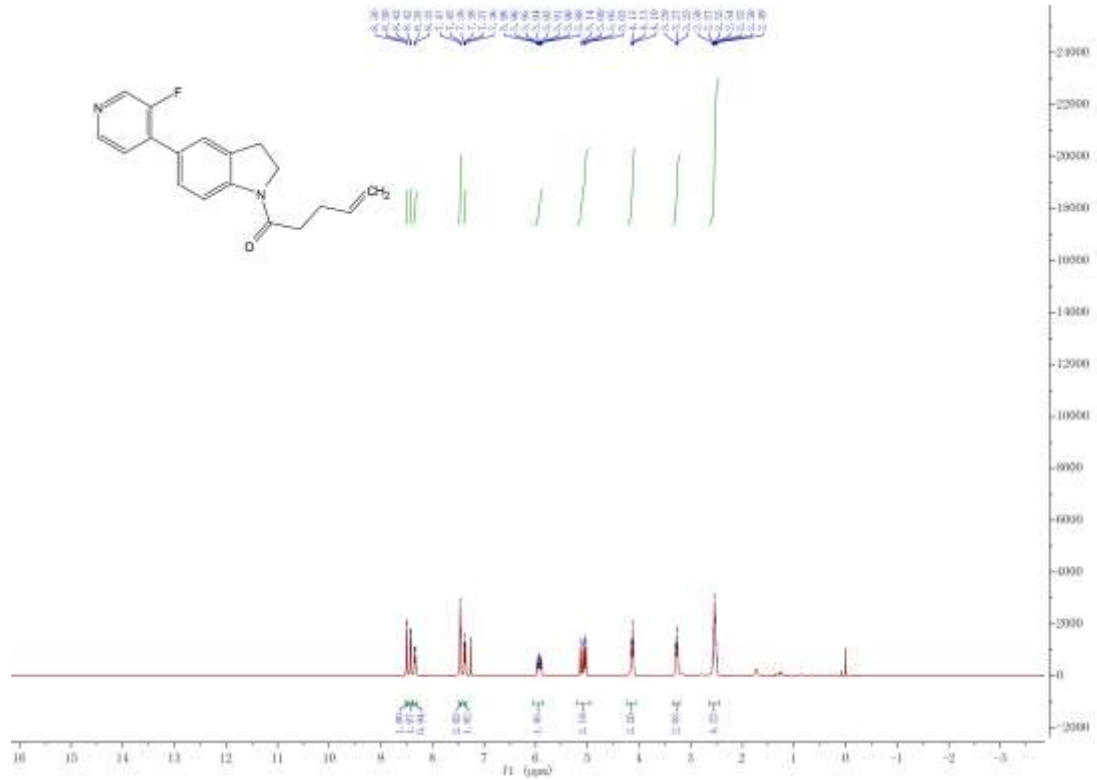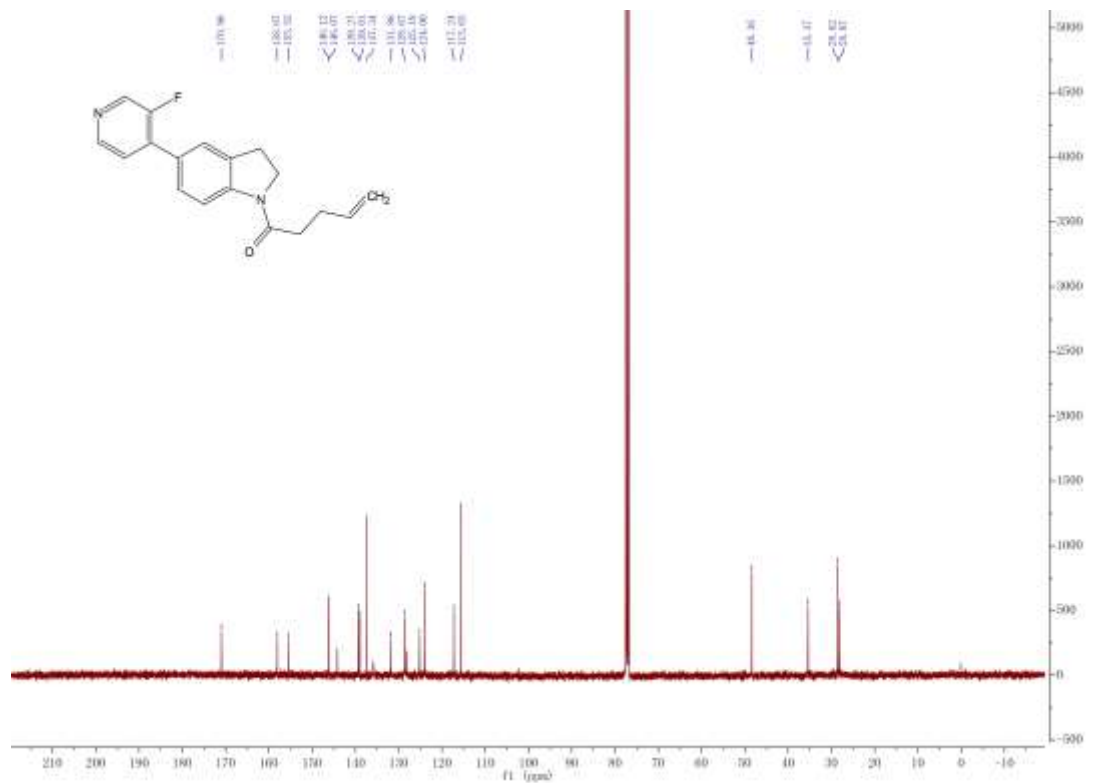

Spectra of  $^1\text{H-NMR}$  and  $^{13}\text{C-NMR}$  of 1-(5-(3-(trifluoromethyl)pyridin-4-yl)-2,3-dihydro-1H-indol-1-yl)pent-4-en-1-one (S-10)

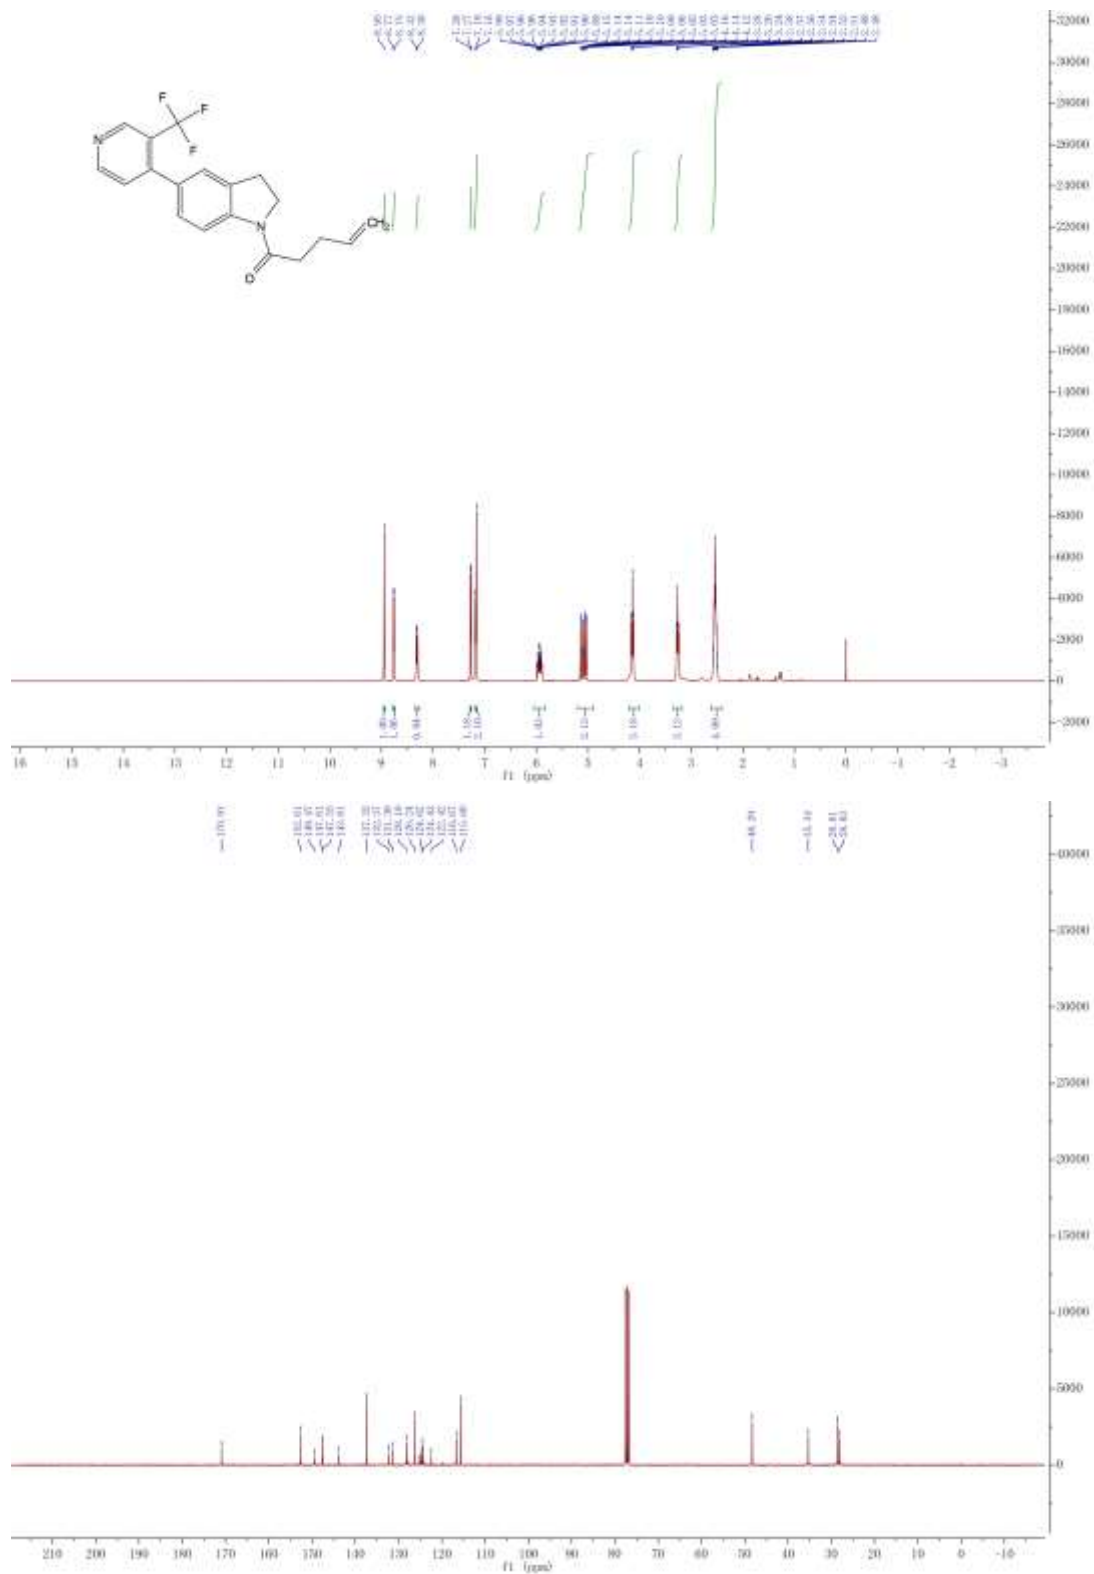

Spectra of  $^1\text{H-NMR}$  and  $^{13}\text{C-NMR}$  of 1-(5-(3-nitropyridin-4-yl)-2,3-dihydro-1H-indol-1-yl)pent-4-en-1-one (S-11)

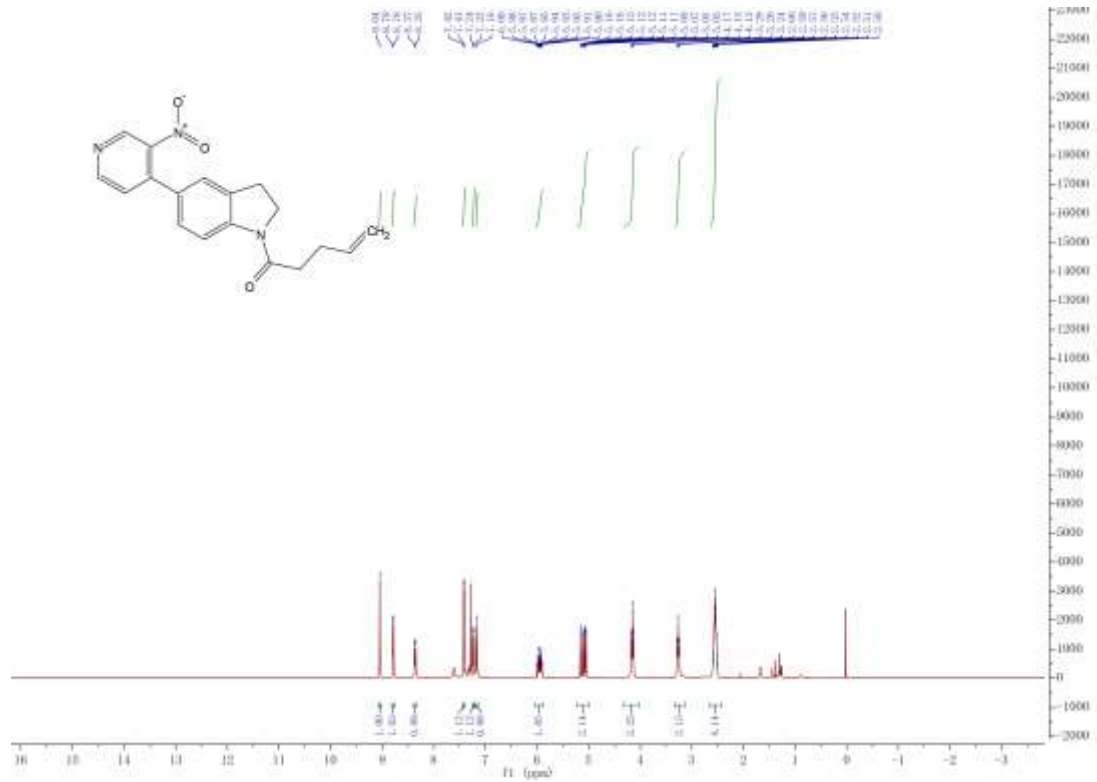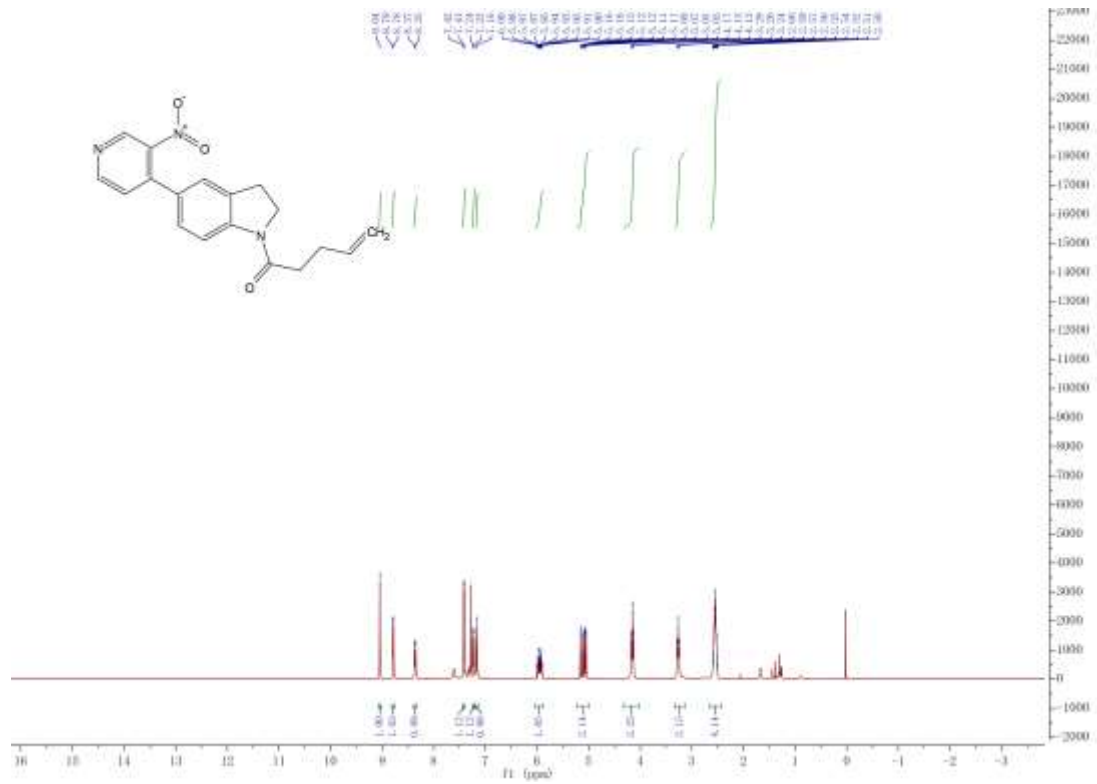







Spectra of  $^1\text{H-NMR}$  and  $^{13}\text{C-NMR}$  of 1-(6-(3-chloropyridin-4-yl)-2,3-dihydro-1H-indol-1-yl)pent-4-en-1-one (S-14)

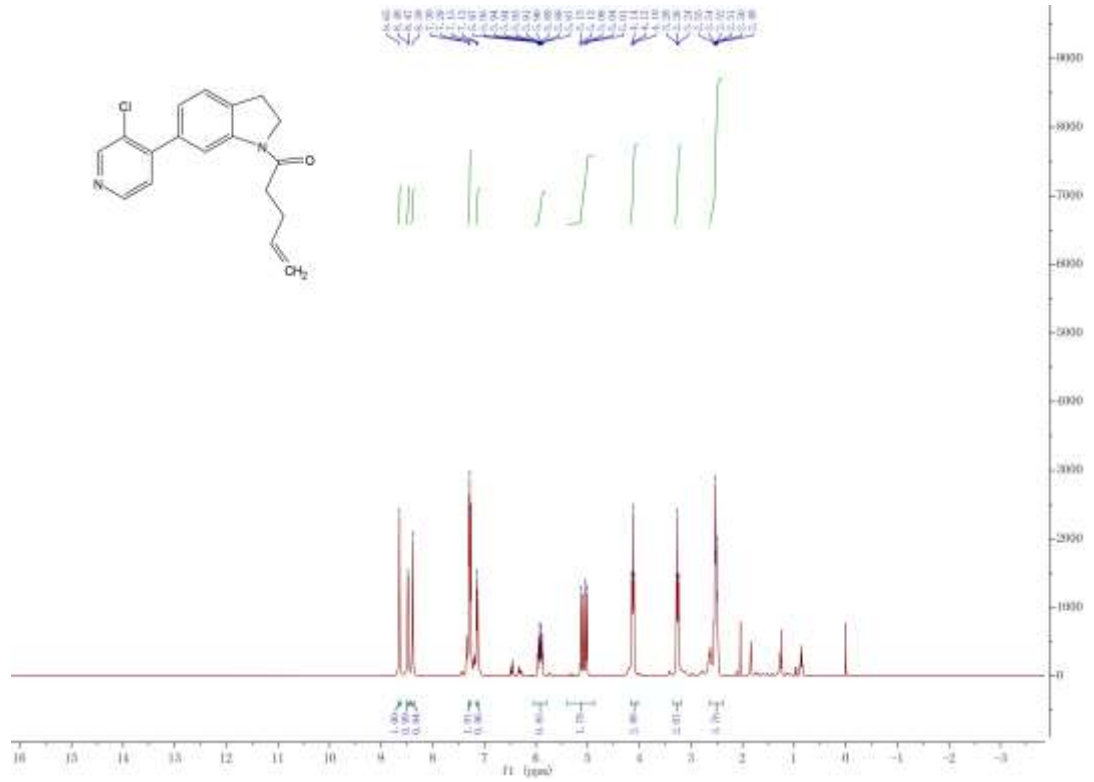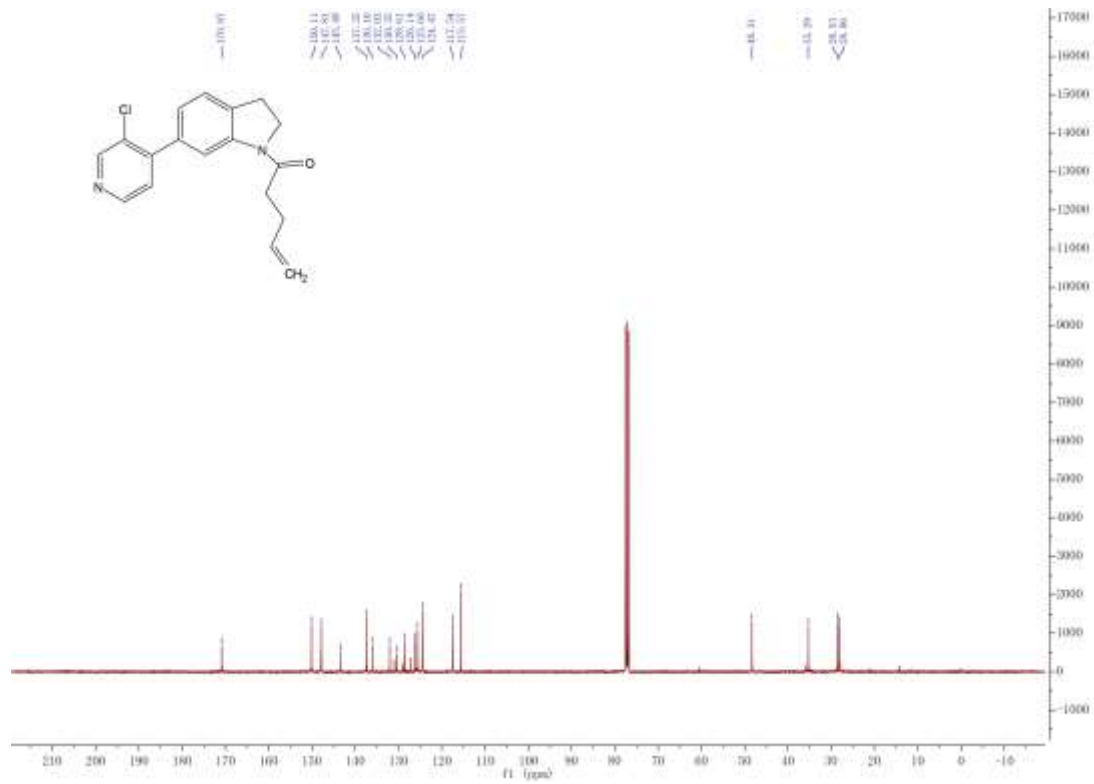



















Spectra of  $^1\text{H-NMR}$  and  $^{13}\text{C-NMR}$  of 1-(5-(3-chloropyridin-4-yl)-2,3-dihydro-1H-indol-1-yl)prop-2-en-1-one (S-23)

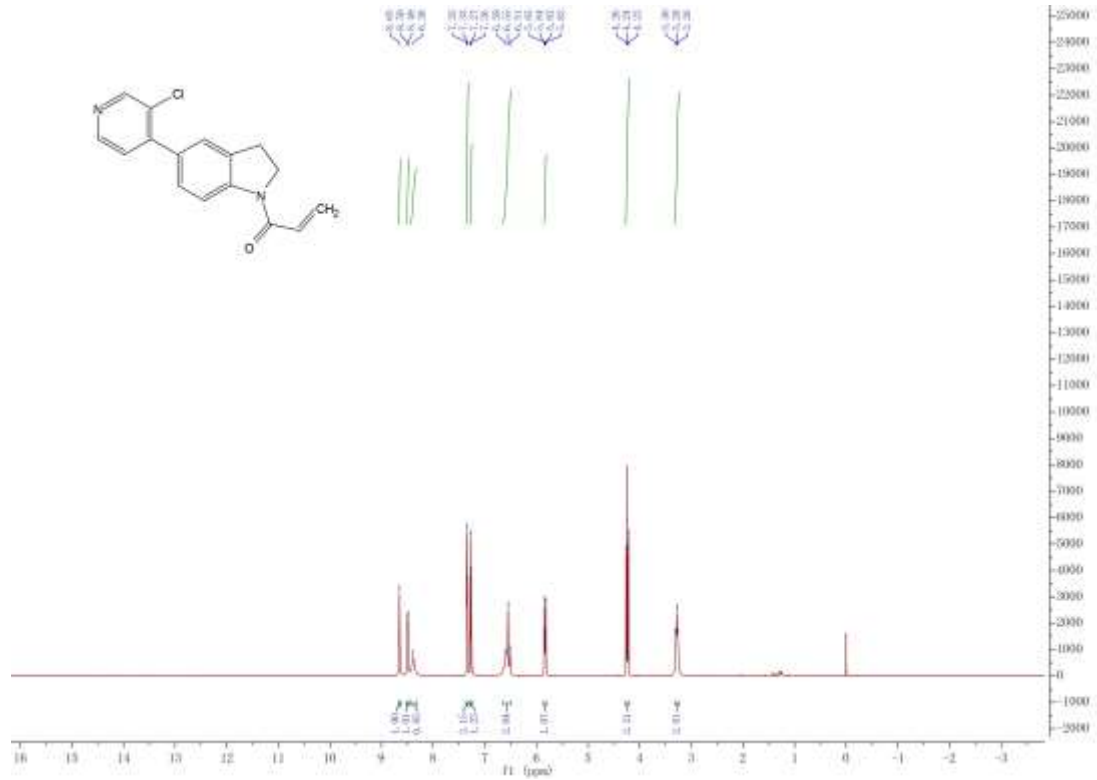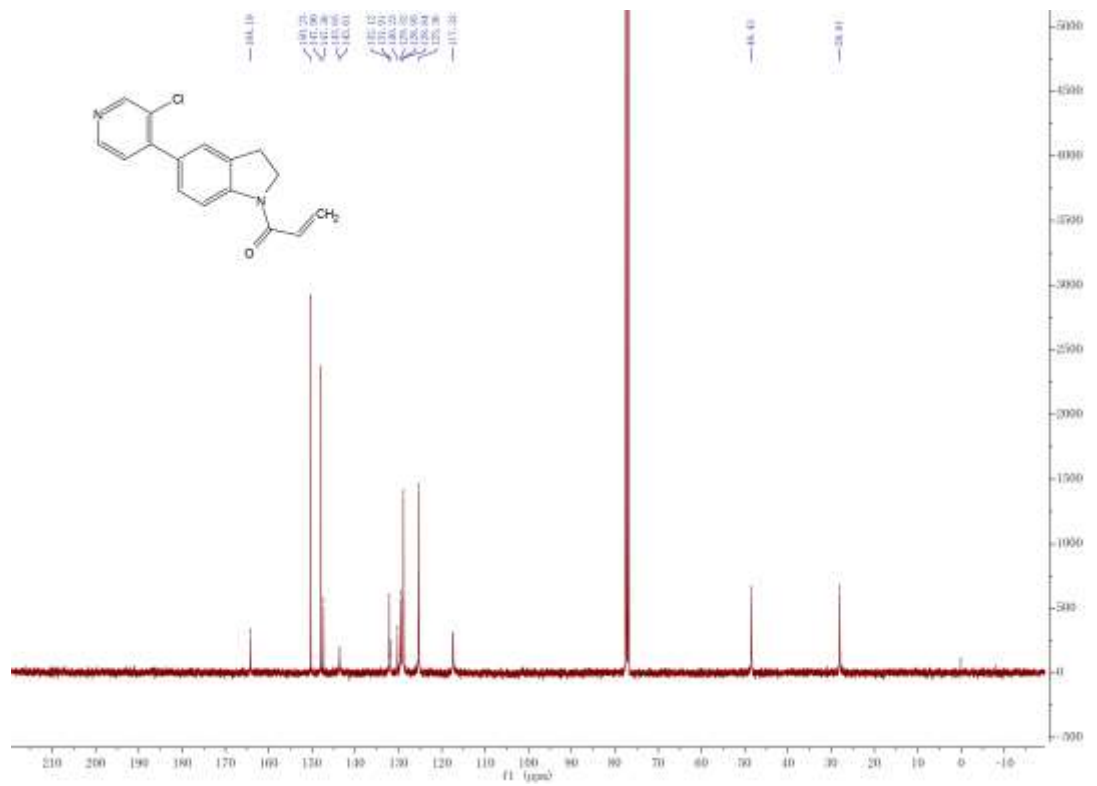

Spectra of  $^1\text{H-NMR}$  and  $^{13}\text{C-NMR}$  of (5-(3-chloropyridin-4-yl)-2,3-dihydro-1H-indol-1-yl)(cyclohexyl)methanone (S-24)

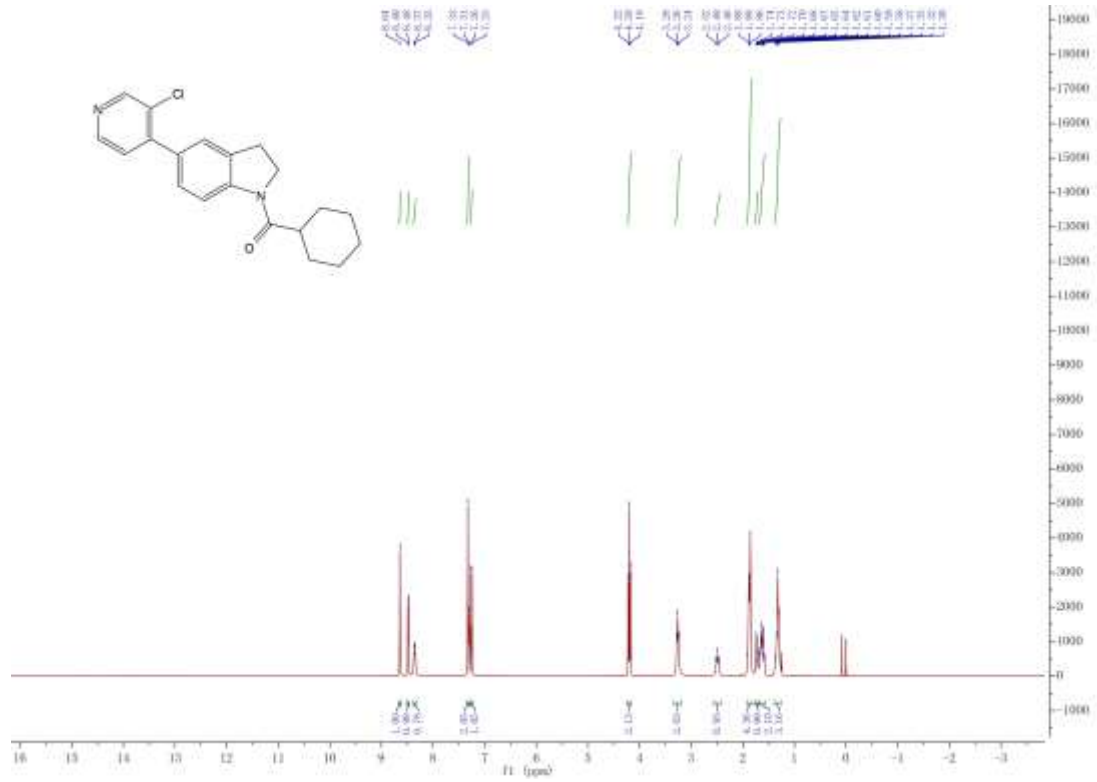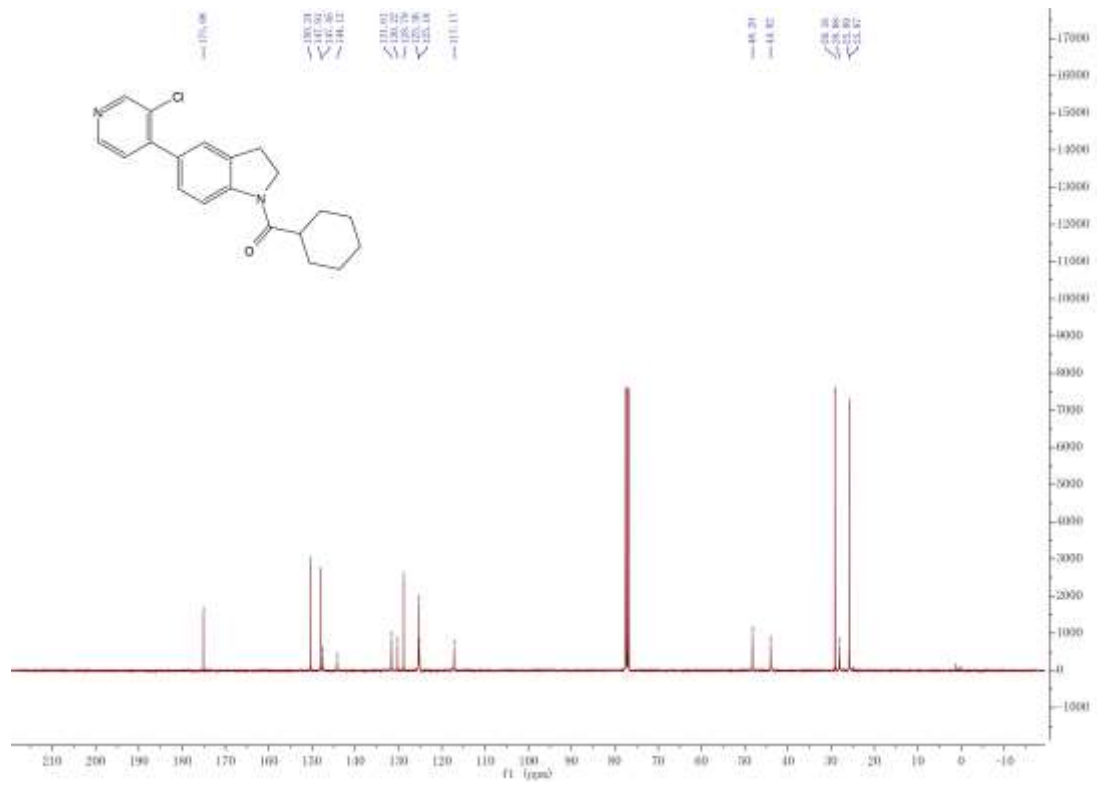



Spectra of  $^1\text{H-NMR}$  and  $^{13}\text{C-NMR}$  of *tert*-butyl 5-(pyridin-4-yl) -2,3-dihydroindole -1-carboxylate (1b)

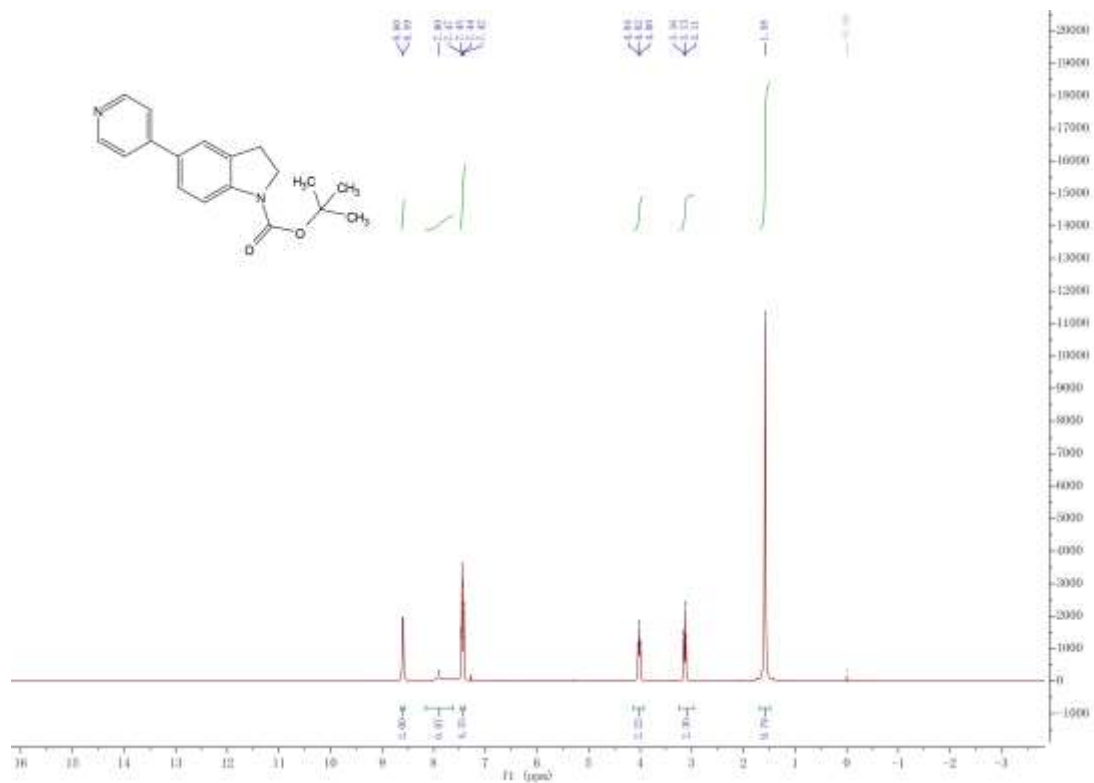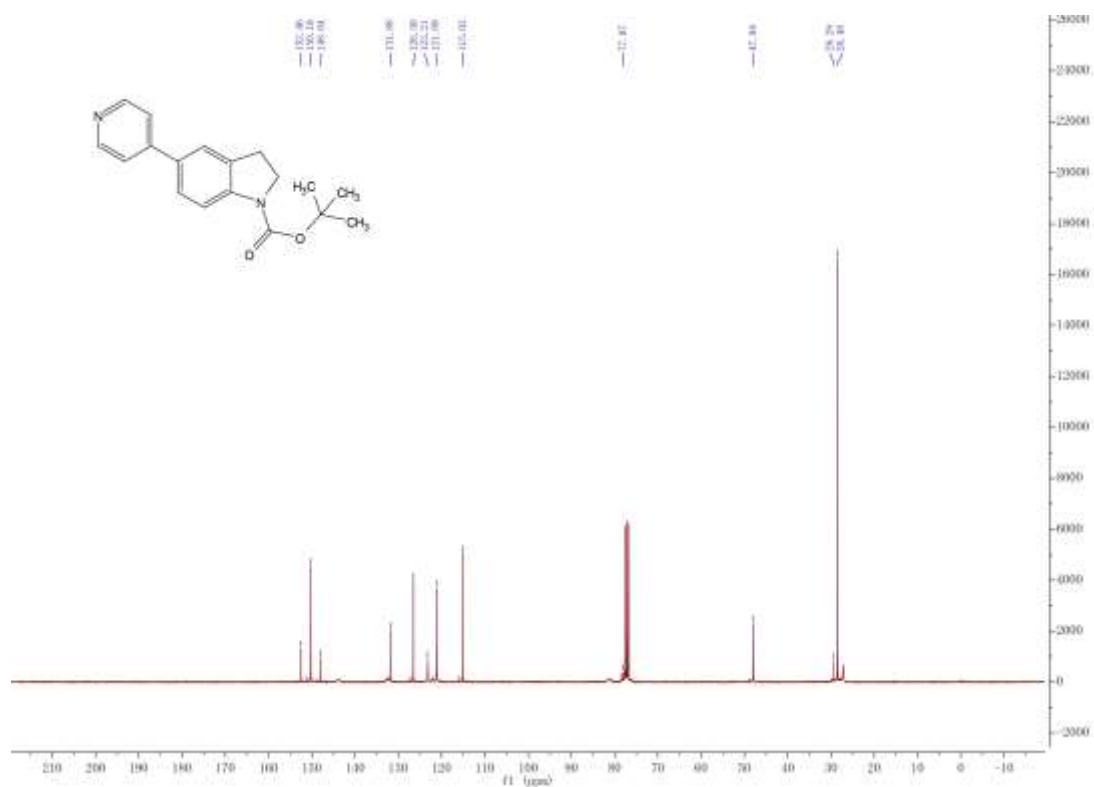

Spectra of  $^1\text{H-NMR}$  and  $^{13}\text{C-NMR}$  of 9-bromo-1-(5-(pyridin-4-yl)indolin-1-yl)nonan-1-one (1d)

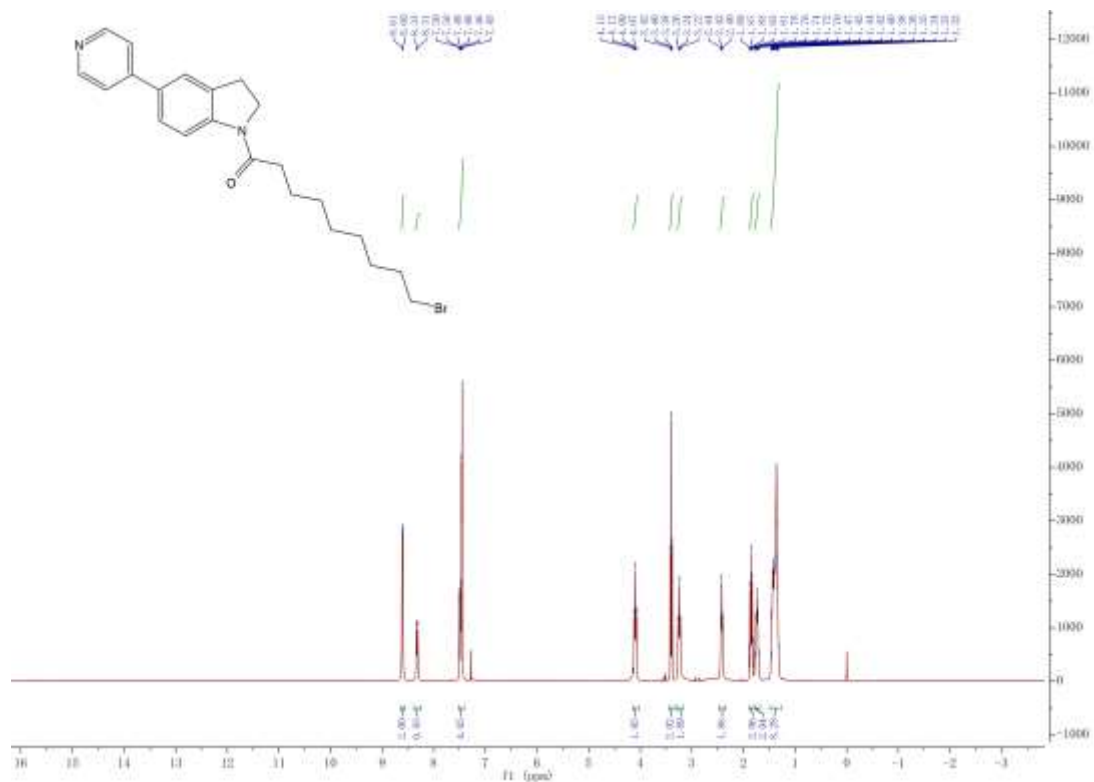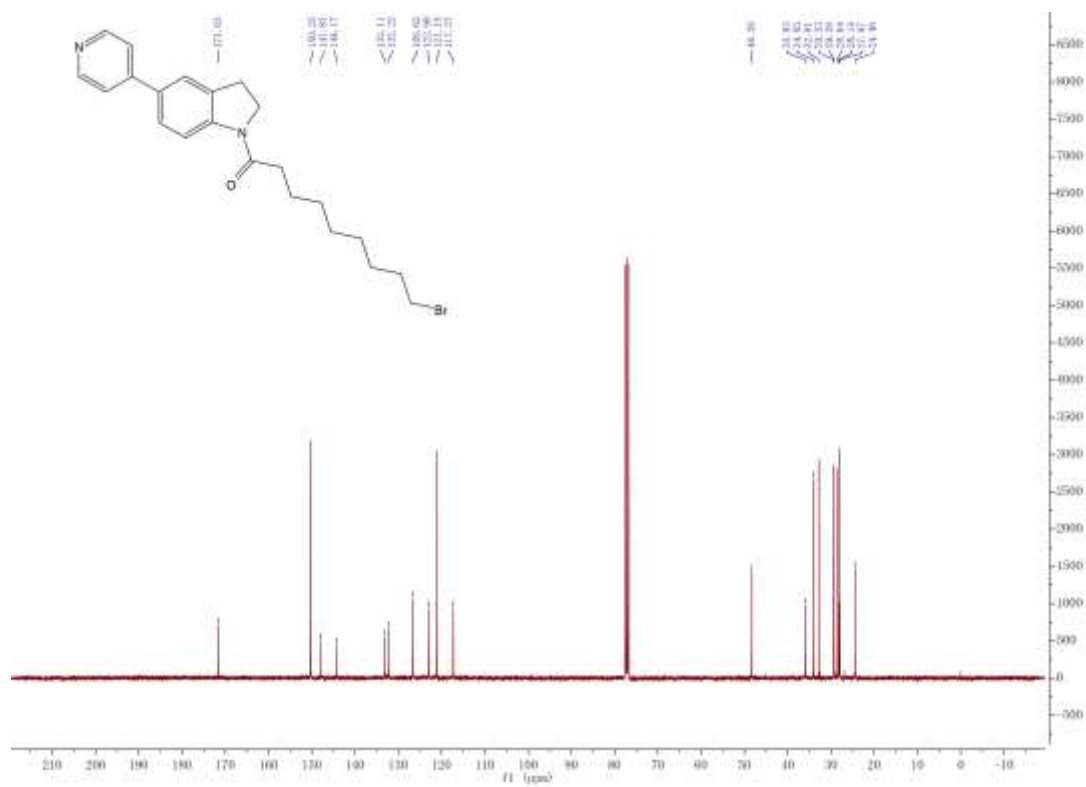





---

## HRMS spectra and HPLC trace

### Instrument information and method

HRMS spectra were obtained from a XEVO G2 QTOF spectrometer (Waters Ltd.). HPLC analysis was performed on Agilent 1260 Infinity using a C18 column [(Agilent Ltd.) SB-C18, 50 × 2.1 mm, 1.8 μm, 0.3 mL/min] and SHIMADZU LC-20AR (Shimadzu Ltd.) using a C8 column (CAPCELL PAK C8 DD, 250 × 10 mm, 5 μm, 4.0 mL/min).

---

**HPLC conditions**    Mobile phase A: 0.1% Formic acid in water

Mobile phase B: acetonitrile

---

| Method A | Time (min) | Solvent A (%) | Solvent B (%) | Flow (mL/min) |
|----------|------------|---------------|---------------|---------------|
|          | 0.00       | 95.0          | 5.0           | 0.300         |
|          | 0.25       | 95.0          | 5.0           | 0.300         |
|          | 9.00       | 0.0           | 100.0         | 0.300         |
|          | 10.00      | 0.0           | 100.0         | 0.300         |
|          | 10.10      | 95.0          | 5.0           | 0.300         |
|          | 11.00      | 95.0          | 5.0           | 0.300         |

Column: Agilent SB-C18 1.8μm (2.1\*50 mm)

---

| Method B | Time (min) | Solvent A (%) | Solvent B (%) | Flow (mL/min) |
|----------|------------|---------------|---------------|---------------|
|          | 0.00       | 80.0          | 20.0          | 1.000         |
|          | 0.25       | 80.0          | 20.0          | 1.000         |
|          | 12.00      | 0.0           | 100.0         | 1.000         |
|          | 16.00      | 0.0           | 100.0         | 1.000         |
|          | 16.10      | 80.0          | 20.0          | 1.000         |
|          | 17.00      | 80.0          | 20.0          | 1.000         |

Column: CAPCELL PAK C8 DD (250\*10 mm)

---

HPLC trace for blank of sequence for all compounds except for S-22 and S-25 (method A)

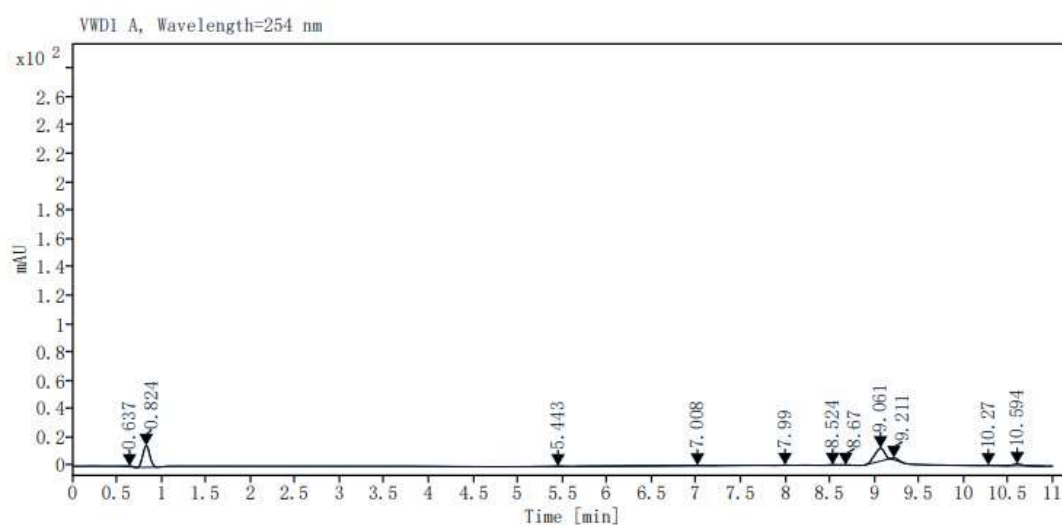

Signal: VWD1 A, Wavelength=254 nm

| Retention Time [min] | Peak Width [min] | Peak Area | Peak Height | Area %  |
|----------------------|------------------|-----------|-------------|---------|
| 0.637                | 0.0881           | 2.7417    | 0.4837      | 1.4393  |
| 0.824                | 0.0864           | 83.3077   | 15.0812     | 43.7342 |
| 5.443                | 0.1162           | 1.8926    | 0.2503      | 0.9935  |
| 7.008                | 0.8498           | 11.7658   | 0.1747      | 6.1767  |
| 7.990                | 0.1162           | 1.0452    | 0.1483      | 0.5487  |
| 8.524                | 0.0881           | 1.1260    | 0.2115      | 0.5911  |
| 8.670                | 0.0921           | 0.8708    | 0.1538      | 0.4572  |
| 9.061                | 0.1196           | 69.5674   | 9.0610      | 36.5209 |
| 9.211                | 0.0852           | 6.3460    | 1.2097      | 3.3315  |
| 10.270               | 0.1820           | 2.4627    | 0.1818      | 1.2929  |
| 10.594               | 0.1135           | 9.3605    | 1.2768      | 4.9140  |

## HPLC trace for blank of sequence for S-22 and S-25 (method B)

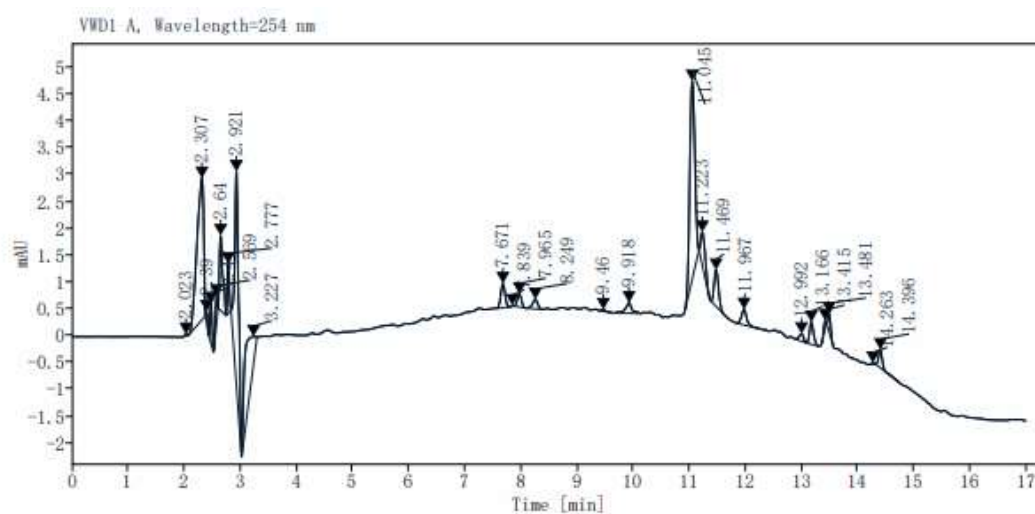

Signal: VWD1 A, Wavelength=254 nm

| Retention Time [min] | Peak Width [min] | Peak Area | Peak Height | Area %  |
|----------------------|------------------|-----------|-------------|---------|
| 2.023                | 0.0422           | 0.0768    | 0.0296      | 0.0690  |
| 2.307                | 0.1181           | 21.9700   | 2.6406      | 19.7561 |
| 2.390                | 0.0259           | 0.2930    | 0.1811      | 0.2635  |
| 2.470                | 0.0402           | 1.8652    | 0.7444      | 1.6773  |
| 2.569                | 0.0401           | 1.1557    | 0.4792      | 1.0392  |
| 2.640                | 0.0606           | 5.6854    | 1.3932      | 5.1125  |
| 2.777                | 0.0394           | 2.2351    | 0.9179      | 2.0099  |
| 2.921                | 0.0697           | 19.2747   | 3.9645      | 17.3324 |
| 3.227                | 0.3758           | 13.4375   | 0.5111      | 12.0834 |
| 7.671                | 0.0837           | 2.3798    | 0.4499      | 2.1400  |
| 7.839                | 0.0444           | 0.0385    | 0.0143      | 0.0346  |
| 7.965                | 0.0830           | 1.2480    | 0.2425      | 1.1223  |
| 8.249                | 0.1000           | 1.1359    | 0.1744      | 1.0214  |
| 9.460                | 0.0813           | 0.1601    | 0.0295      | 0.1440  |
| 9.918                | 0.1124           | 1.5805    | 0.1953      | 1.4212  |
| 11.045               | 0.1033           | 23.4655   | 3.6848      | 21.1009 |
| 11.223               | 0.0948           | 3.4986    | 0.6113      | 3.1461  |
| 11.469               | 0.0885           | 3.7918    | 0.6755      | 3.4097  |
| 11.967               | 0.1002           | 1.9301    | 0.2881      | 1.7356  |

## HRMS spectra for S-1

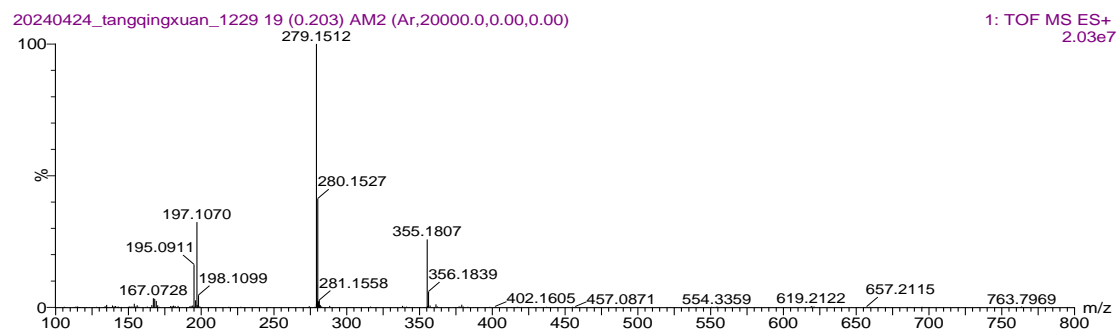

HRMS (ESI) calculated  $C_{18}H_{18}N_2O$ ,  $[M+H]^+ = 279.1497$ , and measured  $[M+H]^+ = 279.1512$ .

## HPLC trace for S-1 (purity, 98.49%, detection at 254nm)

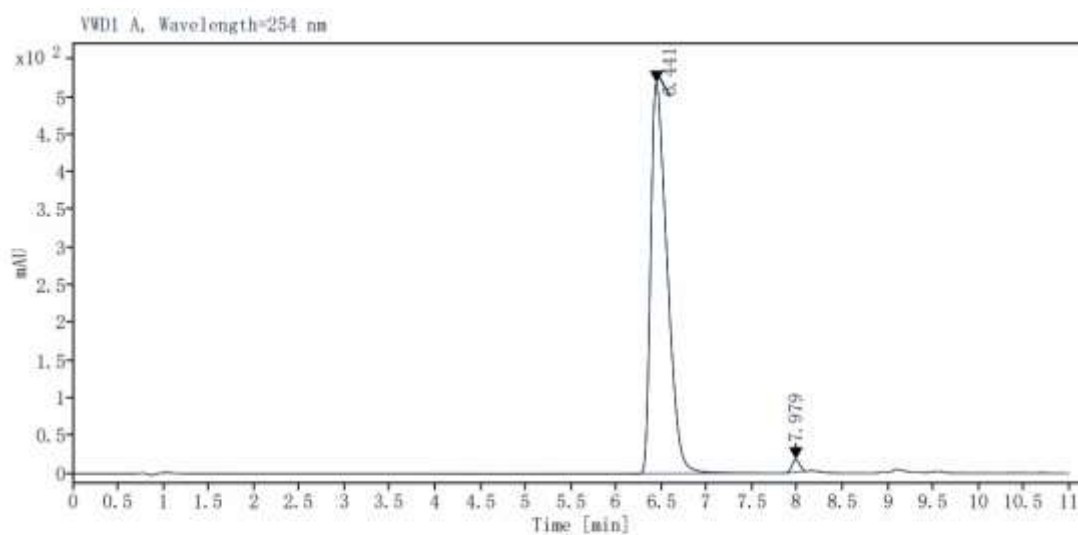

Signal: VWD1 A, Wavelength=254 nm

| Retention Time [min] | Peak Width [min] | Peak Area | Peak Height | Area %  |
|----------------------|------------------|-----------|-------------|---------|
| 6.441                | 0.1917           | 6570.4482 | 519.1284    | 98.4889 |
| 7.979                | 0.0960           | 100.8076  | 16.8079     | 1.5111  |

## HRMS spectra for S-2

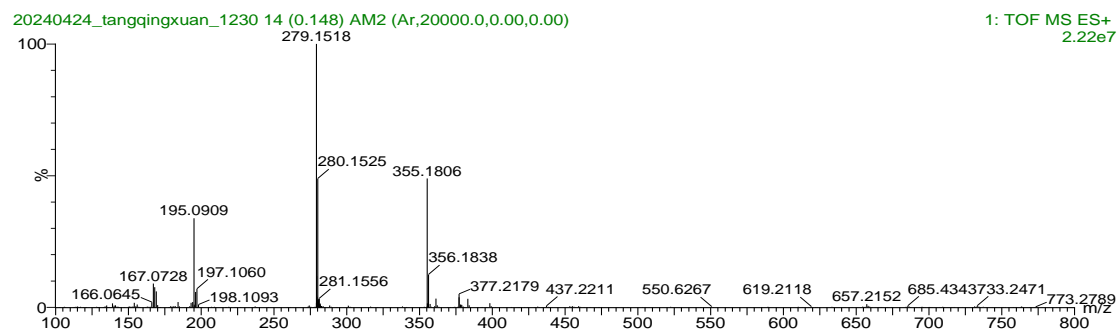

HRMS (ESI) calculated  $C_{18}H_{18}N_2O$ ,  $[M+H]^+ = 279.1497$ , and measured  $[M+H]^+ : 279.1518$

## HPLC trace for S-2 (purity, 97.92%, detection at 254nm)

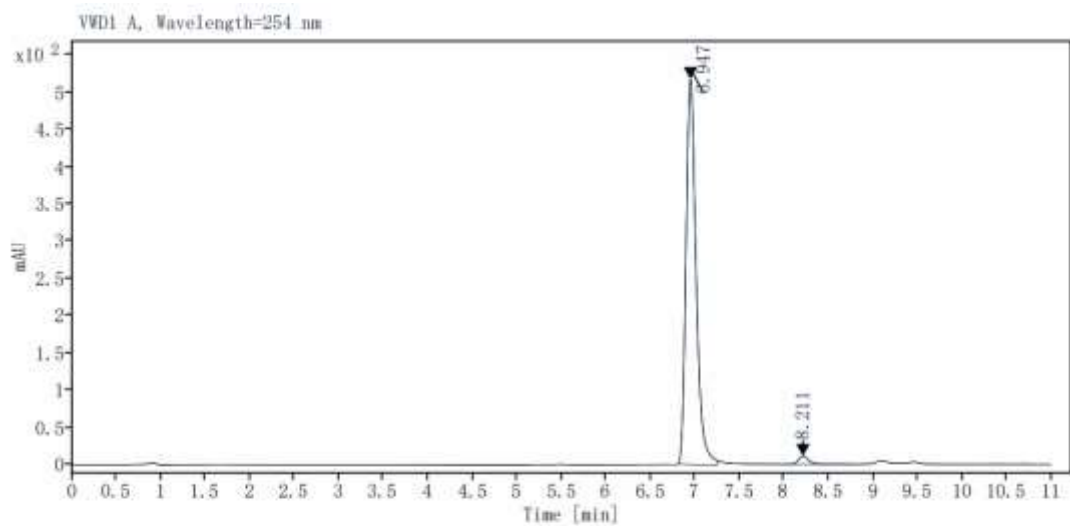

Signal: VWD1 A, Wavelength=254 nm

| Retention Time [min] | Peak Width [min] | Peak Area | Peak Height | Area %  |
|----------------------|------------------|-----------|-------------|---------|
| 6.947                | 0.1319           | 4097.6777 | 517.7788    | 97.9214 |
| 8.211                | 0.1226           | 86.9807   | 10.9589     | 2.0786  |

## HRMS spectra for S-3

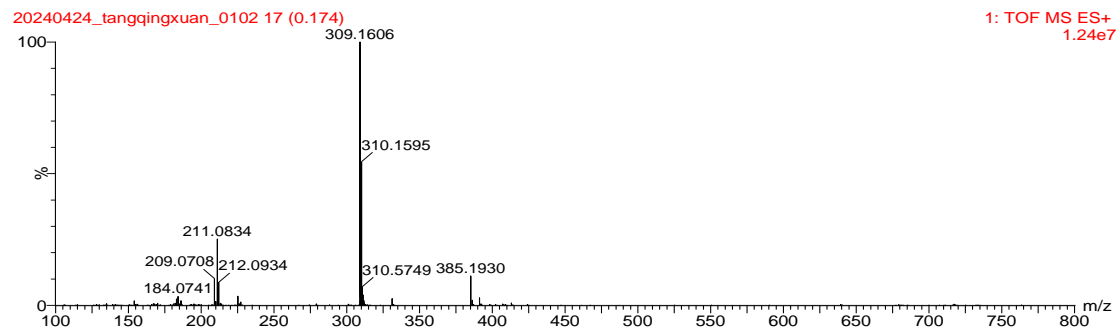

HRMS (ESI) calculated  $C_{19}H_{20}N_2O_2$ ,  $[M+H]^+ = 309.1603$ , and measured  $[M+H]^+ : 309.1606$

## HPLC trace for S-3 (purity, 98.90%, detection at 254nm)

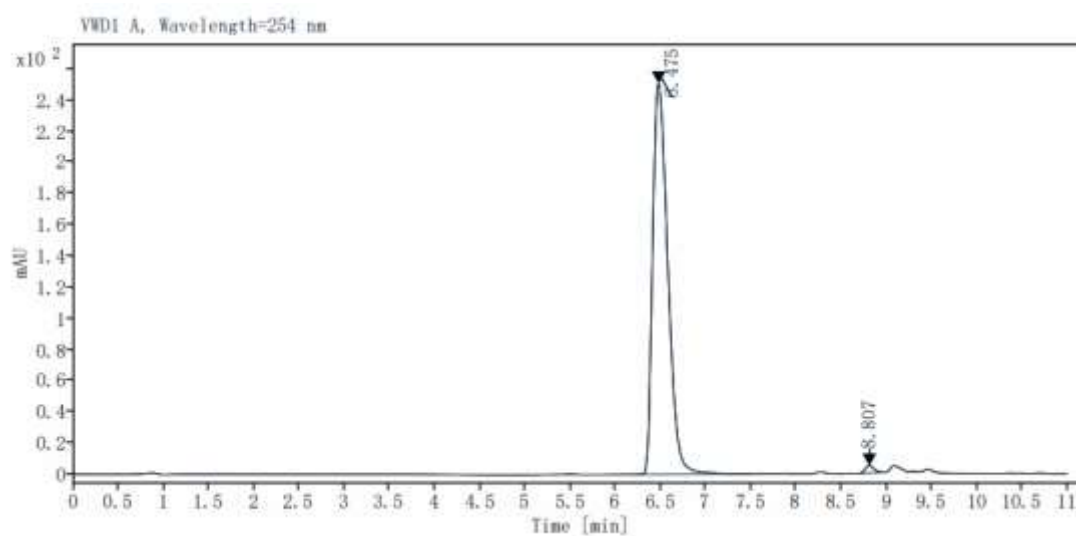

Signal: VWD1 A, Wavelength=254 nm

| Retention Time [min] | Peak Width [min] | Peak Area | Peak Height | Area %  |
|----------------------|------------------|-----------|-------------|---------|
| 6.475                | 0.1835           | 2913.4114 | 250.7777    | 98.9067 |
| 8.807                | 0.1091           | 32.2036   | 4.6312      | 1.0933  |

## HRMS spectra for S-4

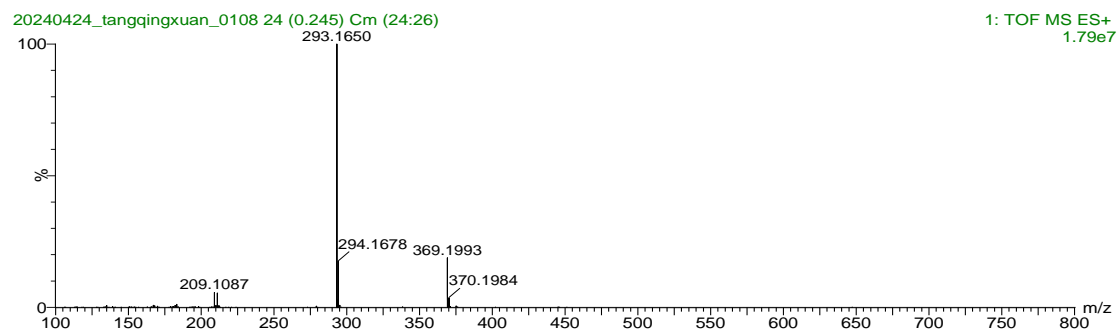

HRMS (ESI) calculated  $C_{19}H_{20}N_2O$ ,  $[M+H]^+ = 293.1654$ , and measured  $[M+H]^+$ : 293.1650

## HPLC trace for S-4 (purity, 98.83%, detection at 254nm)

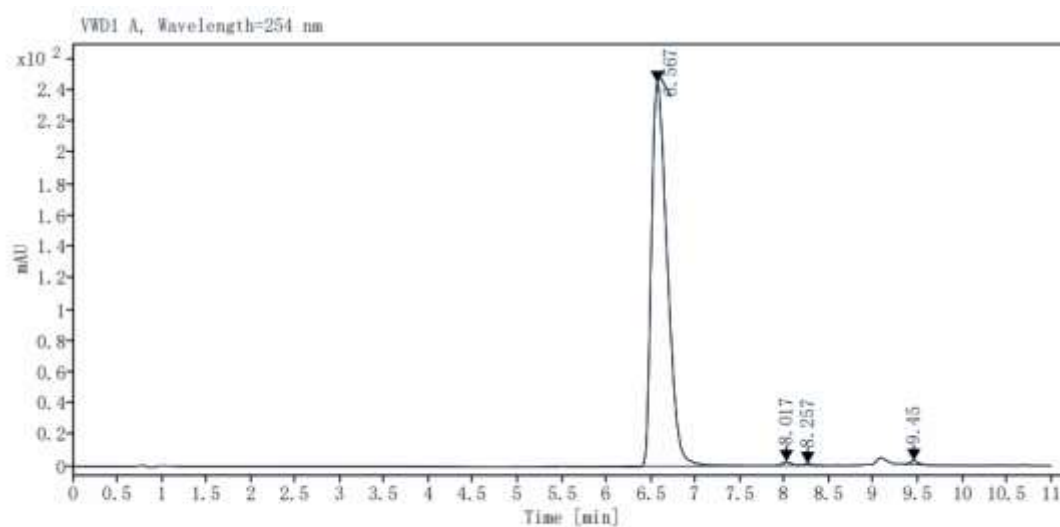

Signal: VWD1 A, Wavelength=254 nm

| Retention Time [min] | Peak Width [min] | Peak Area | Peak Height | Area %  |
|----------------------|------------------|-----------|-------------|---------|
| 6.567                | 0.1960           | 3020.9558 | 244.7359    | 98.8358 |
| 8.017                | 0.1059           | 15.4118   | 2.3091      | 0.5042  |
| 8.257                | 0.0950           | 6.2359    | 1.0241      | 0.2040  |
| 9.450                | 0.0957           | 13.9377   | 2.2678      | 0.4560  |



## HRMS spectra for S-5

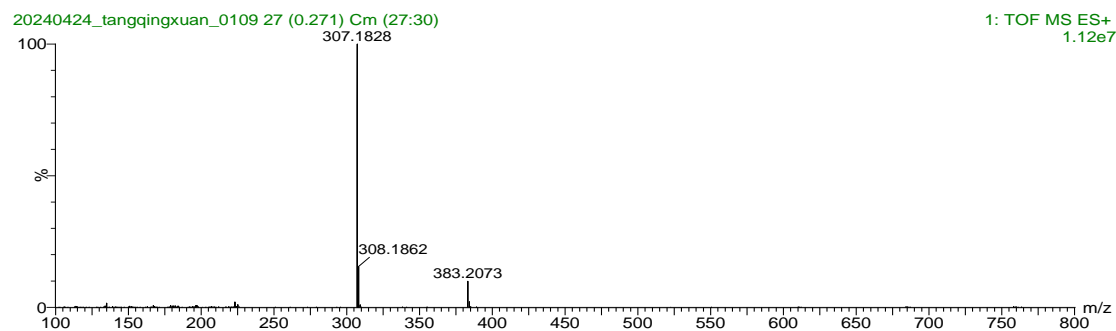

HRMS (ESI) calculated  $C_{20}H_{22}N_2O$ ,  $[M+H]^+ = 307.1810$ , and measured  $[M+H]^+ : 307.1828$

## HPLC trace for S-5 (purity, 96.62%, detection at 254nm)

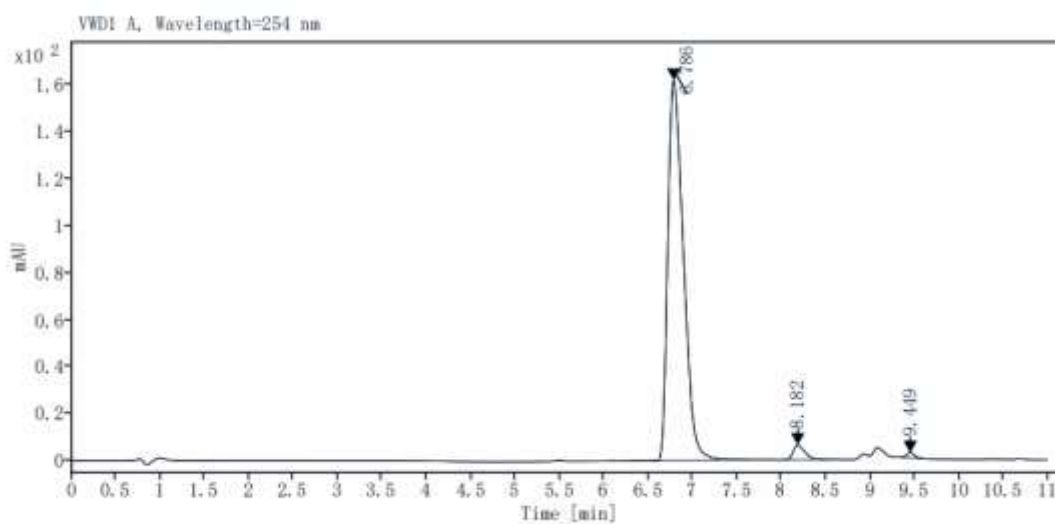

Signal: VWD1 A, Wavelength=254 nm

| Retention Time [min] | Peak Width [min] | Peak Area | Peak Height | Area %  |
|----------------------|------------------|-----------|-------------|---------|
| 6.786                | 0.1946           | 1978.7377 | 161.8880    | 96.6163 |
| 8.182                | 0.1329           | 55.9496   | 6.2221      | 2.7319  |
| 9.449                | 0.0956           | 13.3501   | 2.1766      | 0.6518  |

## HRMS spectra for S-6

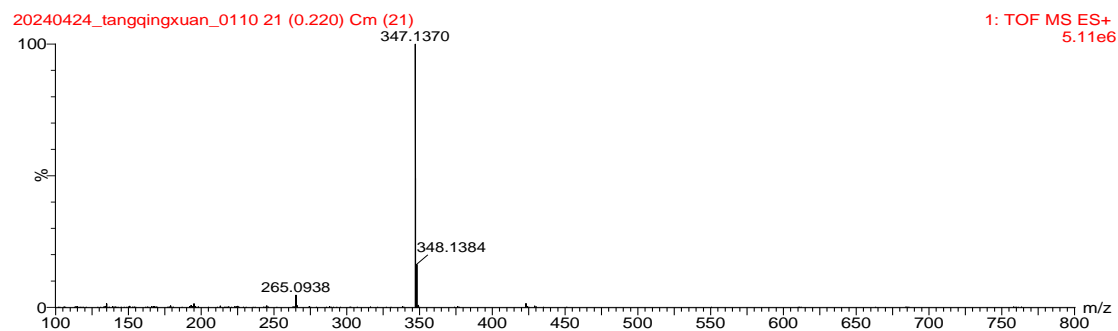

HRMS (ESI) calculated  $C_{19}H_{17}F_3N_2O$ ,  $[M+H]^+ = 347.1371$ , and measured  $[M+H]^+$ : 347.1370

## HPLC trace for S-6 (purity, 100%, detection at 254nm)

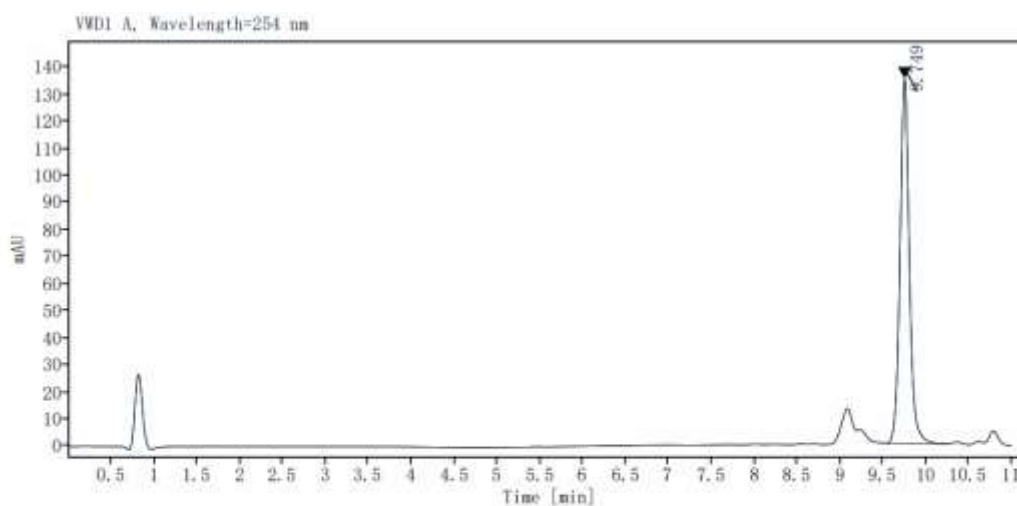

Signal: VWD1 A, Wavelength=254 nm

| Retention Time [min] | Peak Width [min] | Peak Area | Peak Height | Area %   |
|----------------------|------------------|-----------|-------------|----------|
| 9.749                | 0.1168           | 1025.7622 | 134.7071    | 100.0000 |

## HRMS spectra for S-7

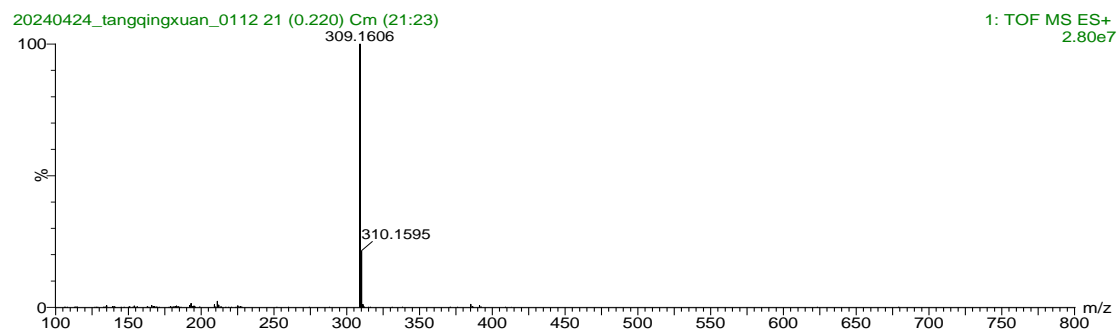

HRMS (ESI) calculated  $C_{19}H_{20}N_2O_2$ ,  $[M+H]^+ = 309.1603$ , and measured  $[M+H]^+ : 309.1606$

## HPLC trace for S-7 (purity, 100%, detection at 254nm)

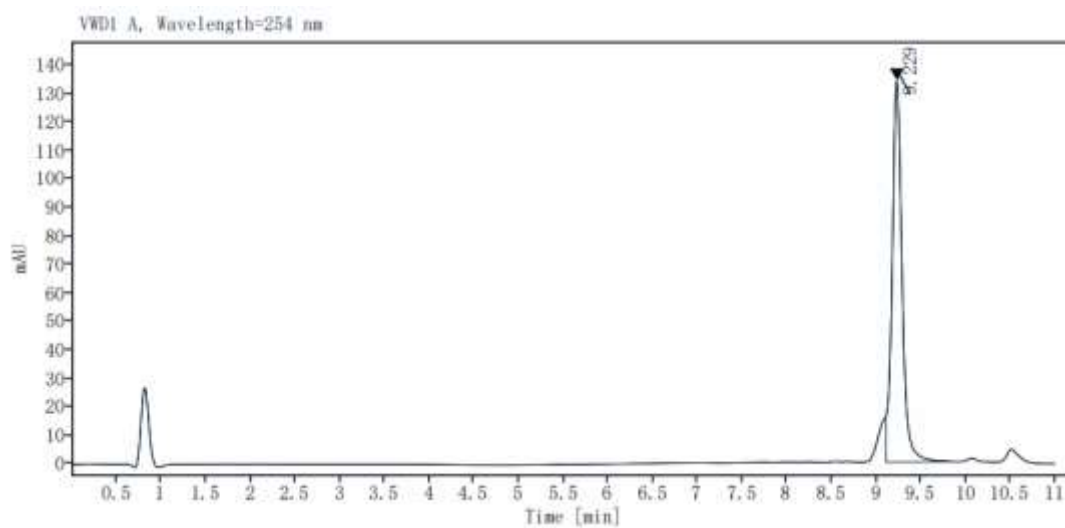

Signal: VWD1 A, Wavelength=254 nm

| Retention Time [min] | Peak Width [min] | Peak Area | Peak Height | Area %   |
|----------------------|------------------|-----------|-------------|----------|
| 9.229                | 0.1299           | 1043.2941 | 133.8300    | 100.0000 |

## HRMS spectra for S-8

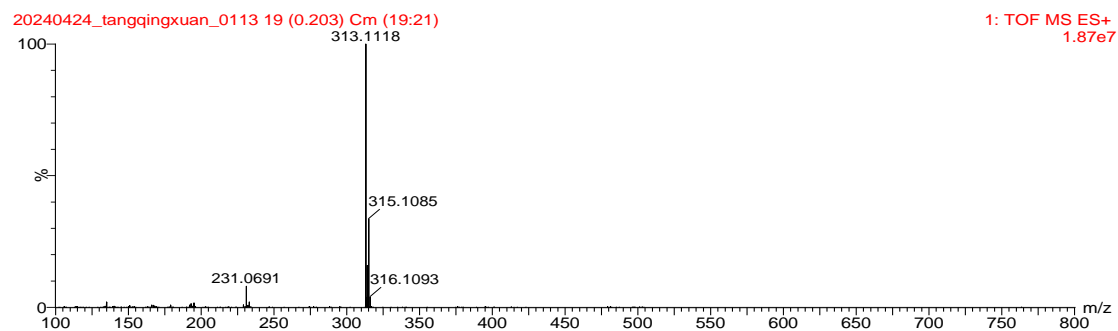

HRMS (ESI) calculated  $C_{18}H_{17}ClN_2O$ ,  $[M+H]^+ = 313.1108$ , and measured  $[M+H]^+$ : 313.1118

## HPLC trace for S-8 (purity, 100%, detection at 254nm)

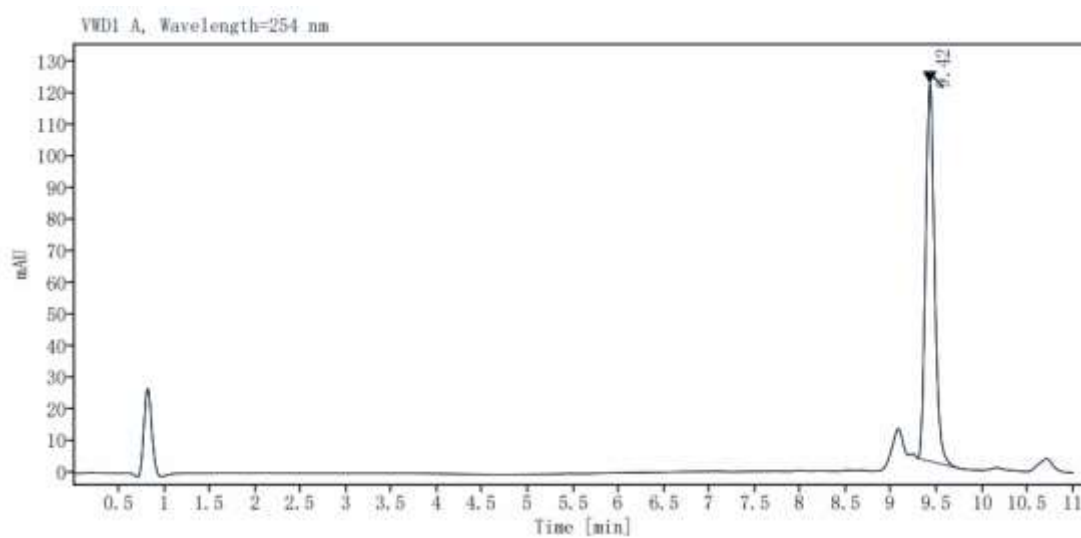

Signal: VWD1 A, Wavelength=254 nm

| Retention Time [min] | Peak Width [min] | Peak Area | Peak Height | Area %   |
|----------------------|------------------|-----------|-------------|----------|
| 9.420                | 0.1071           | 828.1421  | 119.1893    | 100.0000 |

## HRMS spectra for TH-408

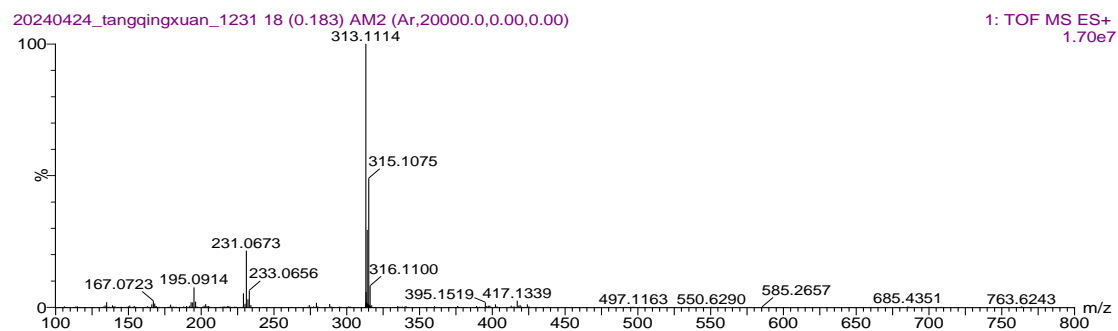

HRMS (ESI) calculated  $C_{18}H_{17}ClN_2O$ ,  $[M+H]^+ = 313.1108$ , and measured  $[M+H]^+$ : 313.1114

## HPLC trace for TH-408 (purity, 99.03%, detection at 254nm)

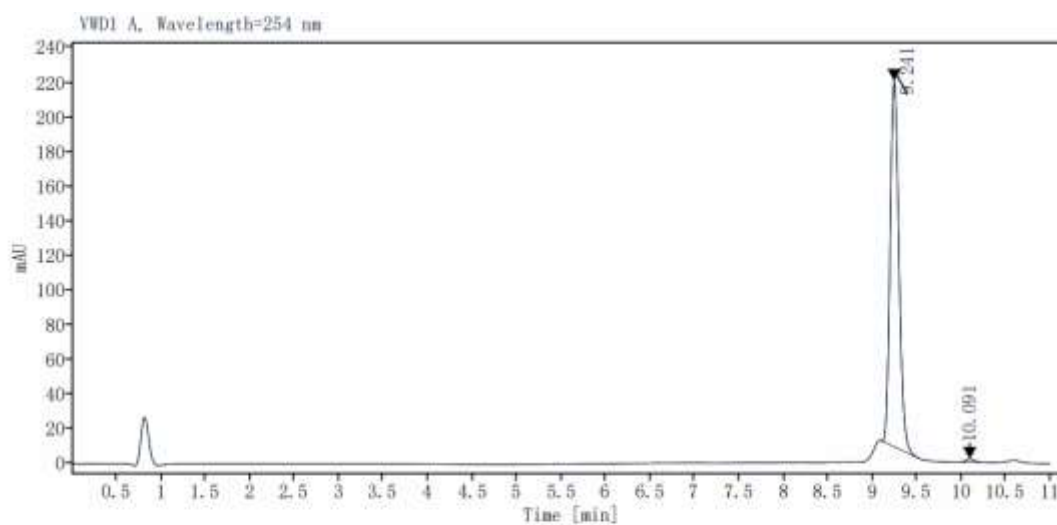

Signal: VWD1 A, Wavelength=254 nm

| Retention Time [min] | Peak Width [min] | Peak Area | Peak Height | Area %  |
|----------------------|------------------|-----------|-------------|---------|
| 9.241                | 0.1061           | 1450.0017 | 211.0805    | 99.0325 |
| 10.091               | 0.1133           | 14.1652   | 1.9370      | 0.9675  |

## HRMS spectra for S-9

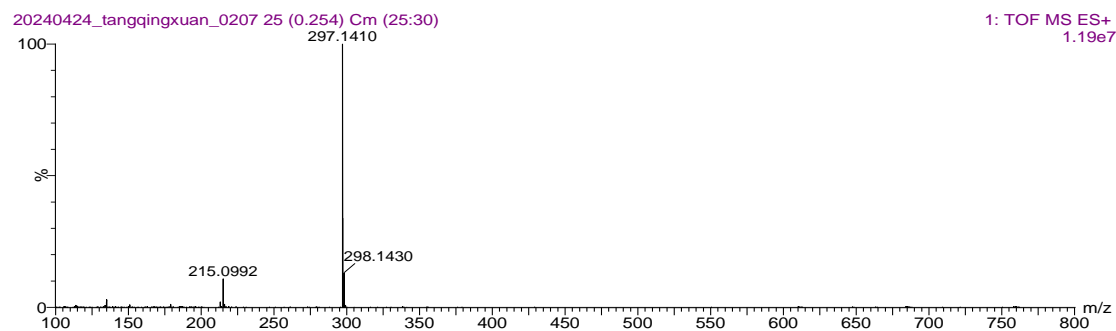

HRMS (ESI) calculated  $C_{18}H_{17}FN_2O$ ,  $[M+H]^+ = 297.1403$ , and measured  $[M+H]^+$ : 297.141

## HPLC trace for S-9 (purity, 100%, detection at 254nm)

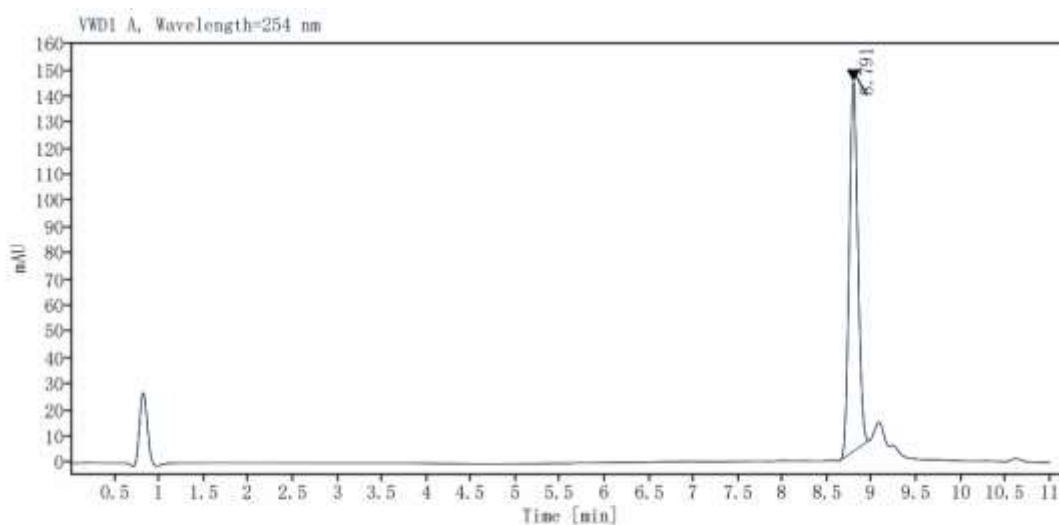

Signal: VWD1 A, Wavelength=254 nm

| Retention Time [min] | Peak Width [min] | Peak Area | Peak Height | Area %   |
|----------------------|------------------|-----------|-------------|----------|
| 8.791                | 0.1073           | 960.6519  | 141.3400    | 100.0000 |

## HRMS spectra for S-10

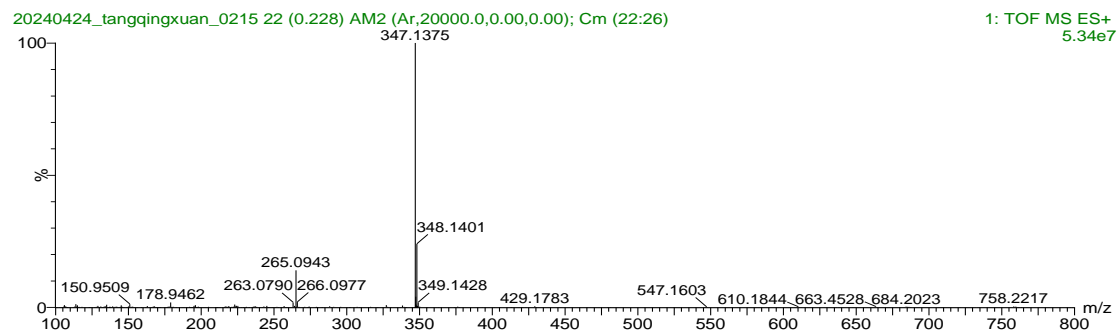

HRMS (ESI) calculated  $C_{19}H_{17}F_3N_2O$ ,  $[M+H]^+ = 347.1371$ , and measured  $[M+H]^+$ : 347.1375

## HPLC trace for S-10 (purity, 100%, detection at 254nm)

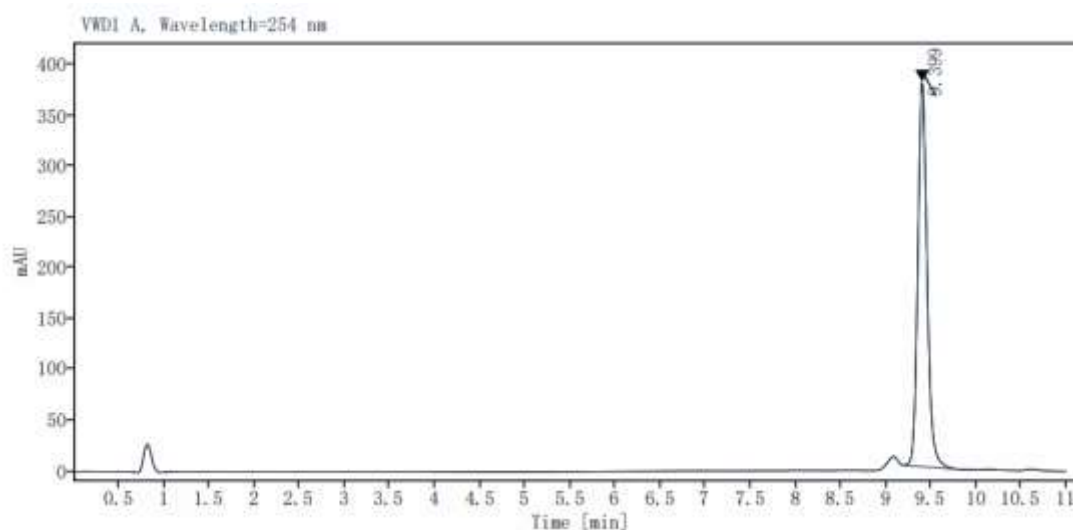

Signal: VWD1 A, Wavelength=254 nm

| Retention Time [min] | Peak Width [min] | Peak Area | Peak Height | Area %   |
|----------------------|------------------|-----------|-------------|----------|
| 9.399                | 0.1123           | 2732.7261 | 378.3625    | 100.0000 |

## HRMS spectra for S-11

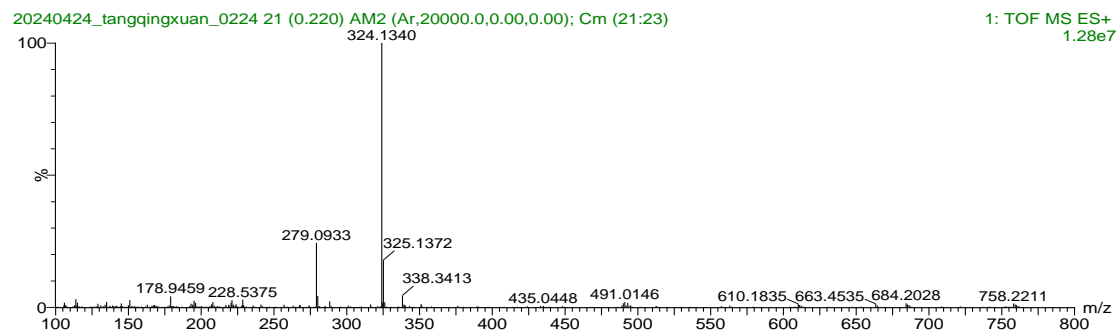

HRMS (ESI) calculated  $C_{18}H_{17}N_3O_3$ ,  $[M+H]^+ = 324.1348$ , and measured  $[M+H]^+ : 324.1340$

## HPLC trace for S-11 (purity, 100%, detection at 254nm)

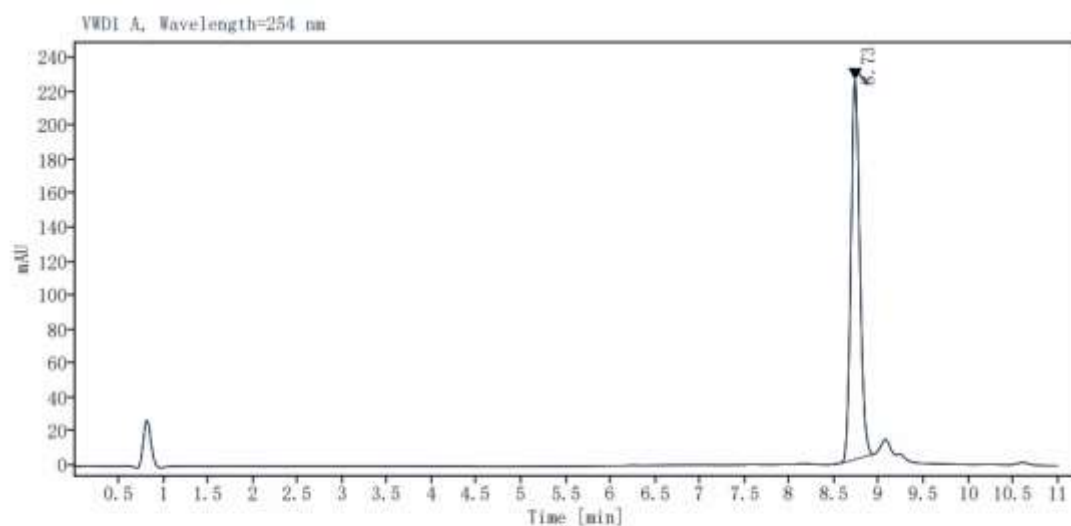

Signal: VWD1 A, Wavelength=254 nm

| Retention Time [min] | Peak Width [min] | Peak Area | Peak Height | Area %   |
|----------------------|------------------|-----------|-------------|----------|
| 8.730                | 0.1091           | 1549.6306 | 222.8377    | 100.0000 |



## HRMS spectra for S-12

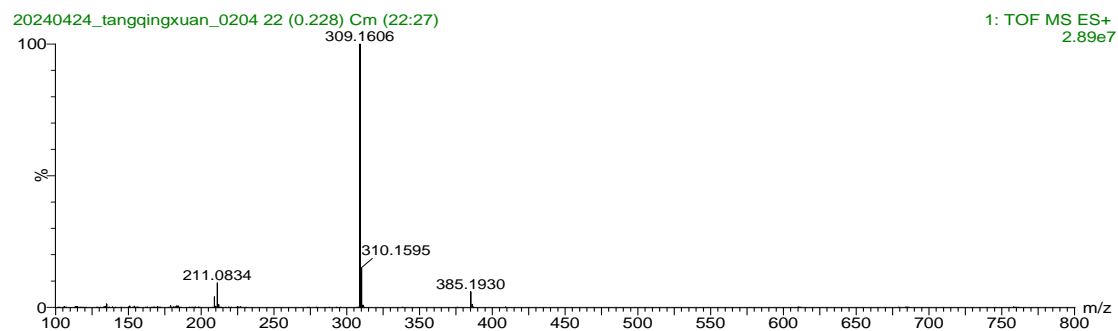

HRMS (ESI) calculated  $C_{19}H_{20}N_2O_2$ ,  $[M+H]^+ = 309.1603$ , and measured  $[M+H]^+ : 309.1606$

## HPLC trace for S-12 (purity, 97.73%, detection at 254nm)

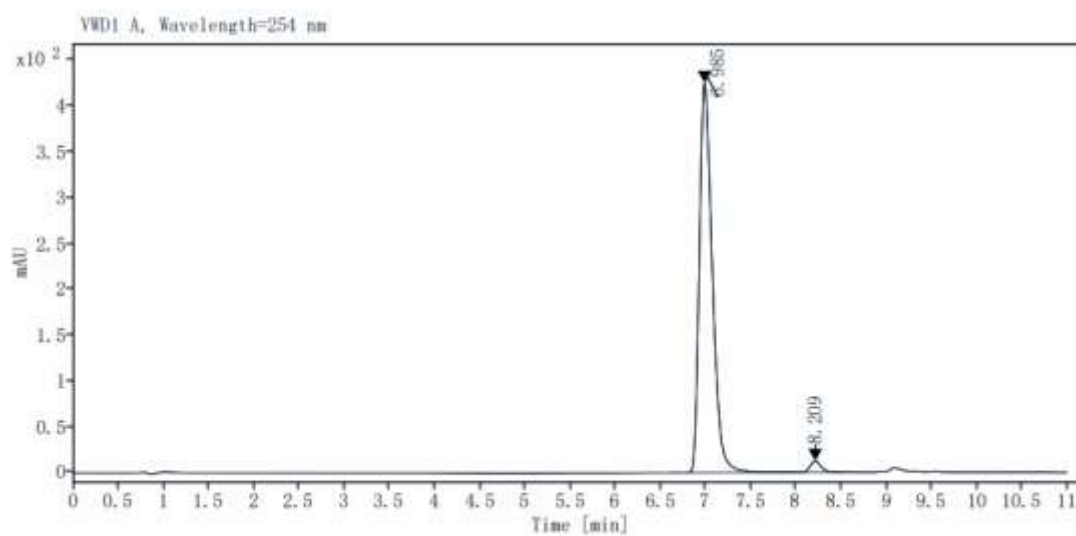

Signal: VWD1 A, Wavelength=254 nm

| Retention Time [min] | Peak Width [min] | Peak Area | Peak Height | Area %  |
|----------------------|------------------|-----------|-------------|---------|
| 6.985                | 0.1544           | 4238.8691 | 424.8307    | 97.7300 |
| 8.209                | 0.1249           | 98.4573   | 12.1083     | 2.2700  |

## HRMS spectra for S-13

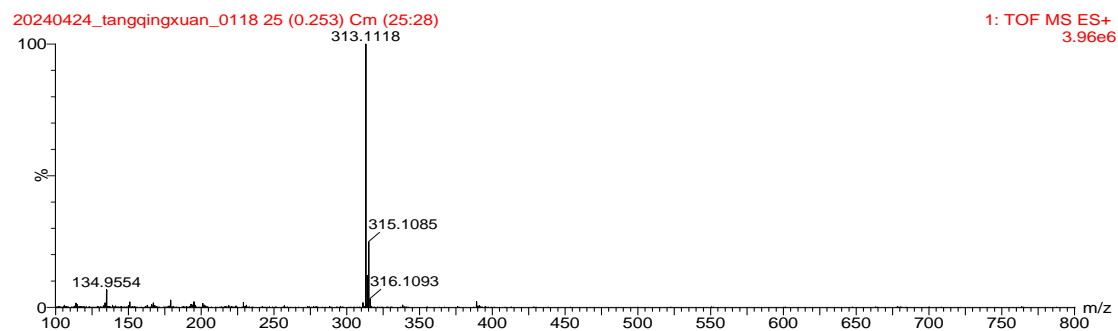

HRMS (ESI) calculated  $C_{18}H_{17}ClN_2O$ ,  $[M+H]^+ = 313.1108$ , and measured  $[M+H]^+$ : 313.1118

## HPLC trace for S-13 (purity, 96.83%, detection at 254nm)

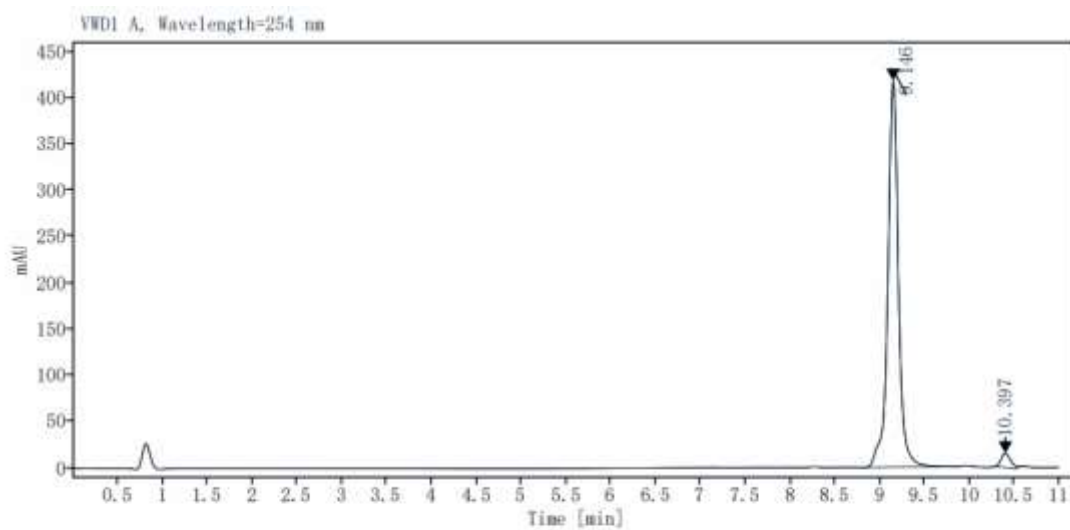

Signal: VWD1 A, Wavelength=254 nm

| Retention Time [min] | Peak Width [min] | Peak Area | Peak Height | Area %  |
|----------------------|------------------|-----------|-------------|---------|
| 9.146                | 0.1240           | 3436.3147 | 417.4023    | 96.8279 |
| 10.397               | 0.1238           | 112.5757  | 15.1561     | 3.1721  |

## HRMS spectra for S-14

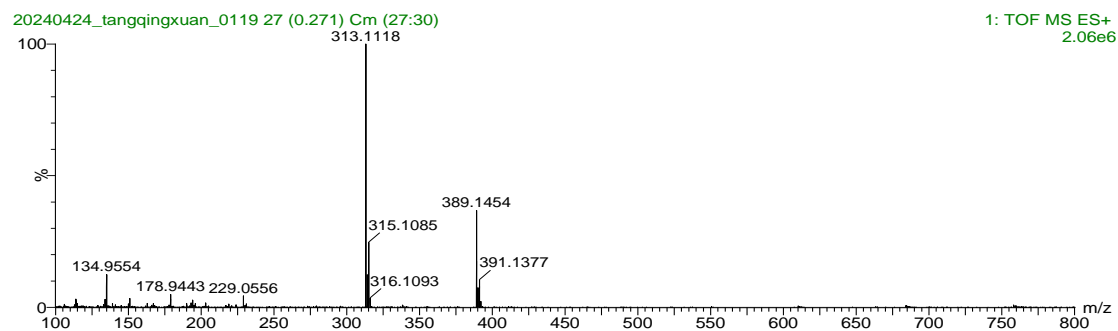

HRMS (ESI) calculated  $C_{18}H_{17}ClN_2O$ ,  $[M+H]^+ = 313.1108$ , and measured  $[M+H]^+$ : 313.1118

## HPLC trace for S-14 (purity, 100%, detection at 254nm)

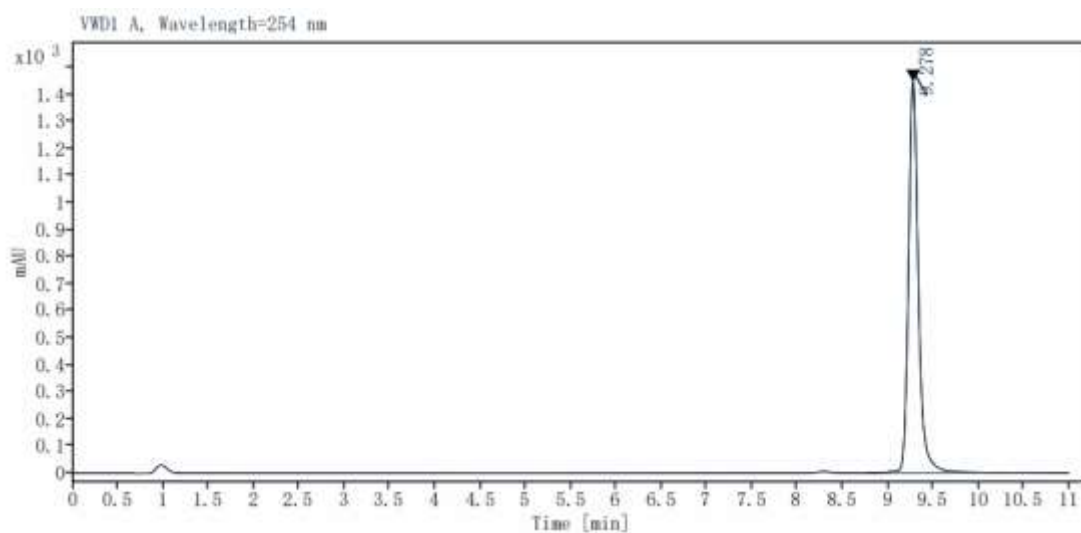

Signal: VWD1 A, Wavelength=254 nm

| Retention Time [min] | Peak Width [min] | Peak Area  | Peak Height | Area %   |
|----------------------|------------------|------------|-------------|----------|
| 9.278                | 0.1175           | 11090.8857 | 1445.0328   | 100.0000 |

## HRMS spectra for S-15

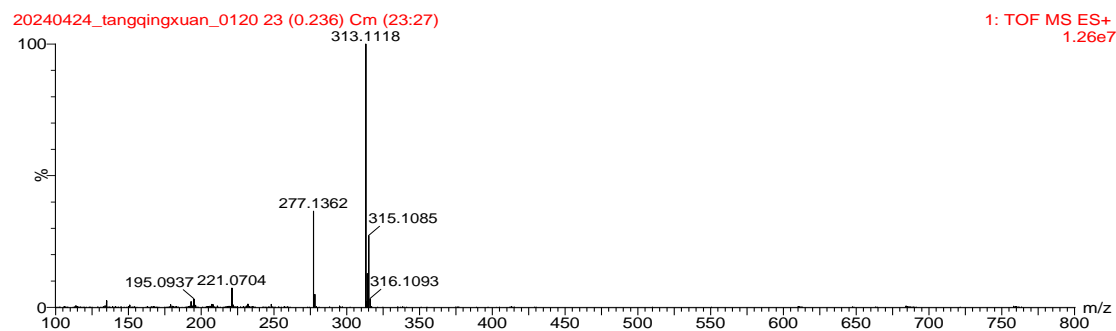

HRMS (ESI) calculated  $C_{18}H_{17}ClN_2O$ ,  $[M+H]^+ = 313.1108$ , and measured  $[M+H]^+$ : 313.1118

## HPLC trace for S-15 (purity, 99.25%, detection at 254nm)

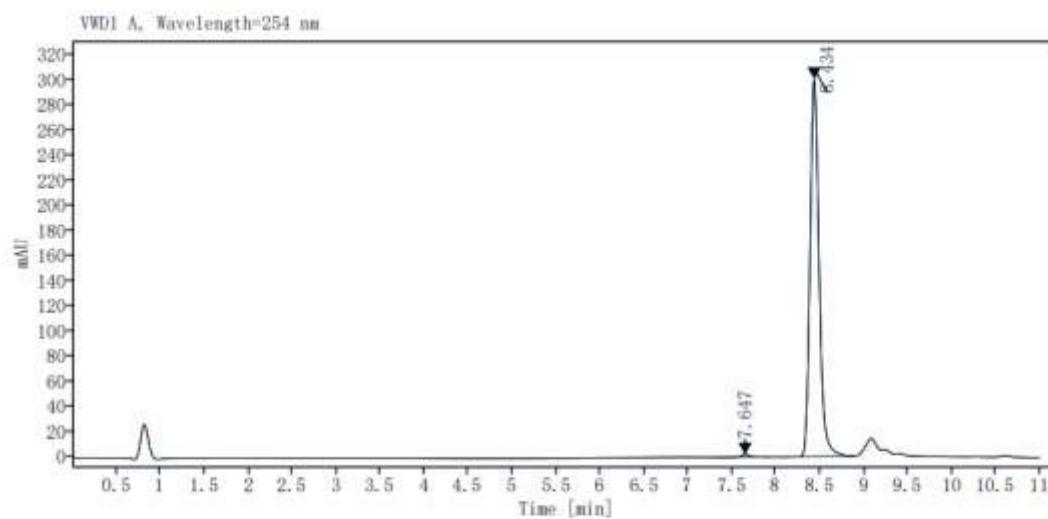

Signal: VWD1 A, Wavelength=254 nm

| Retention Time [min] | Peak Width [min] | Peak Area | Peak Height | Area %  |
|----------------------|------------------|-----------|-------------|---------|
| 7.647                | 0.1197           | 16.4733   | 2.0522      | 0.7545  |
| 8.434                | 0.1122           | 2166.9690 | 300.3223    | 99.2455 |

## HRMS spectra for S-16

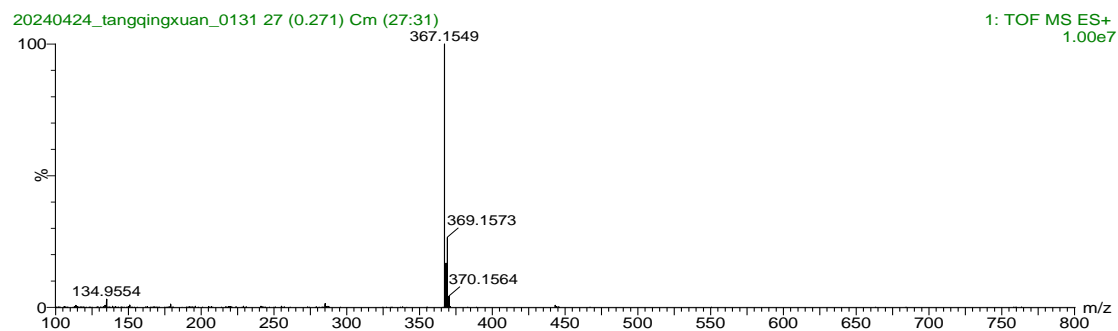

HRMS (ESI) calculated  $C_{22}H_{23}ClN_2O$ ,  $[M+H]^+ = 367.1577$ , and measured  $[M+H]^+$ : 367.1549

## HPLC trace for S-16 (purity, 100%, detection at 254nm)

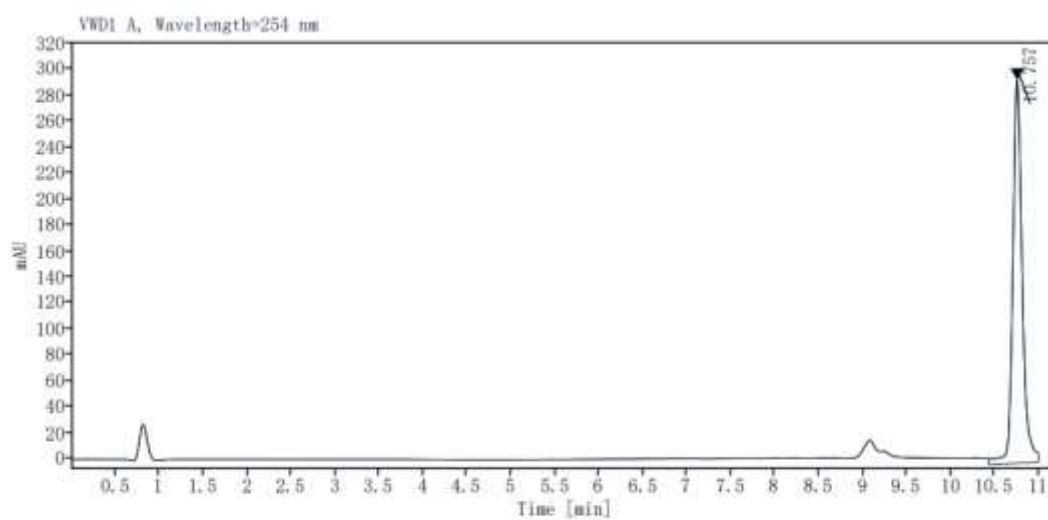

Signal: VWD1 A, Wavelength=254 nm

| Retention Time [min] | Peak Width [min] | Peak Area | Peak Height | Area %   |
|----------------------|------------------|-----------|-------------|----------|
| 10.757               | 0.1250           | 2206.5828 | 294.3026    | 100.0000 |

## HRMS spectra for S-17

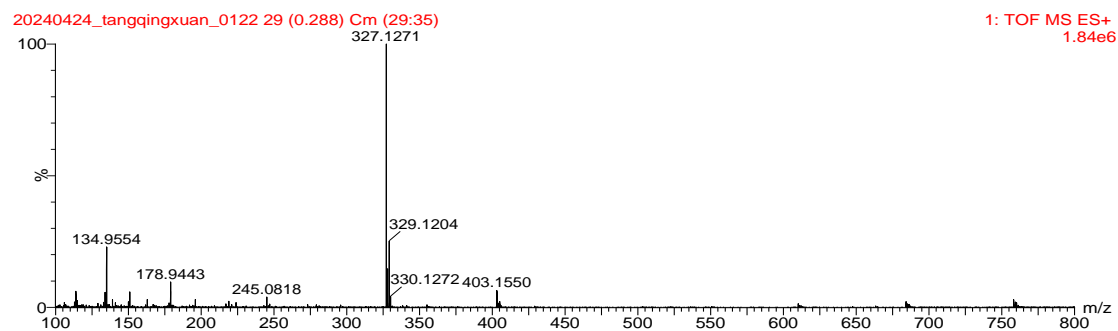

HRMS (ESI) calculated  $C_{19}H_{19}ClN_2O$ ,  $[M+H]^+ = 327.1264$ , and measured  $[M+H]^+$ : 327.1271

## HPLC trace for S-17 (purity, 98.51%, detection at 254nm)

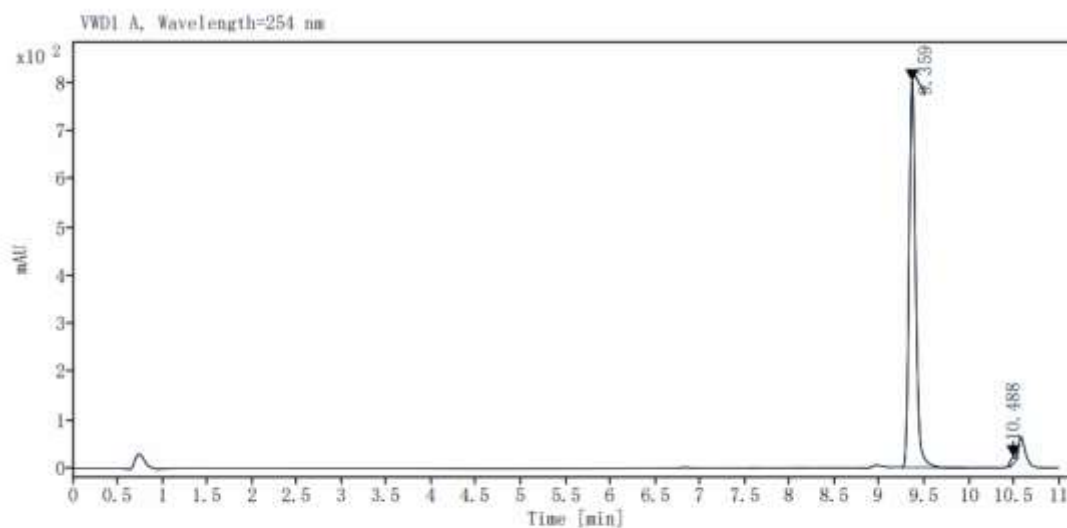

Signal: VWD1 A, Wavelength=254 nm

| Retention Time [min] | Peak Width [min] | Peak Area | Peak Height | Area %  |
|----------------------|------------------|-----------|-------------|---------|
| 9.359                | 0.0774           | 4082.6995 | 801.7144    | 98.5140 |
| 10.488               | 0.0793           | 61.5830   | 12.9384     | 1.4860  |

## HRMS spectra for S-18

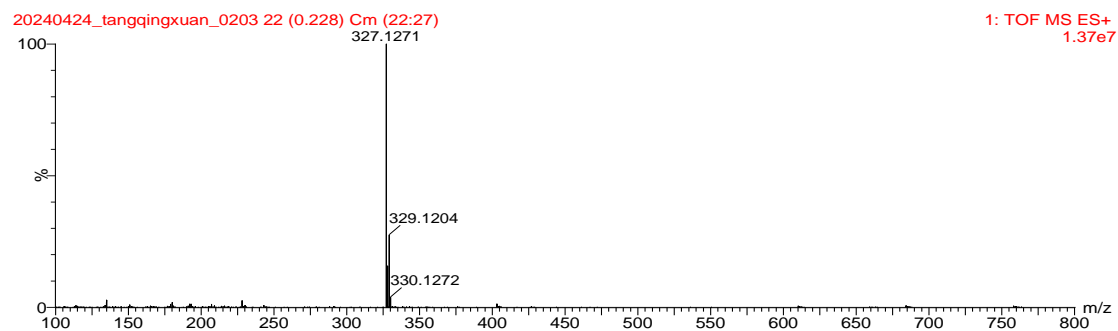

HRMS (ESI) calculated  $C_{19}H_{19}ClN_2O$ ,  $[M+H]^+ = 327.1264$ , and measured  $[M+H]^+$ : 327.1271

## HPLC trace for S-18 (purity, 99.48%, detection at 254nm)

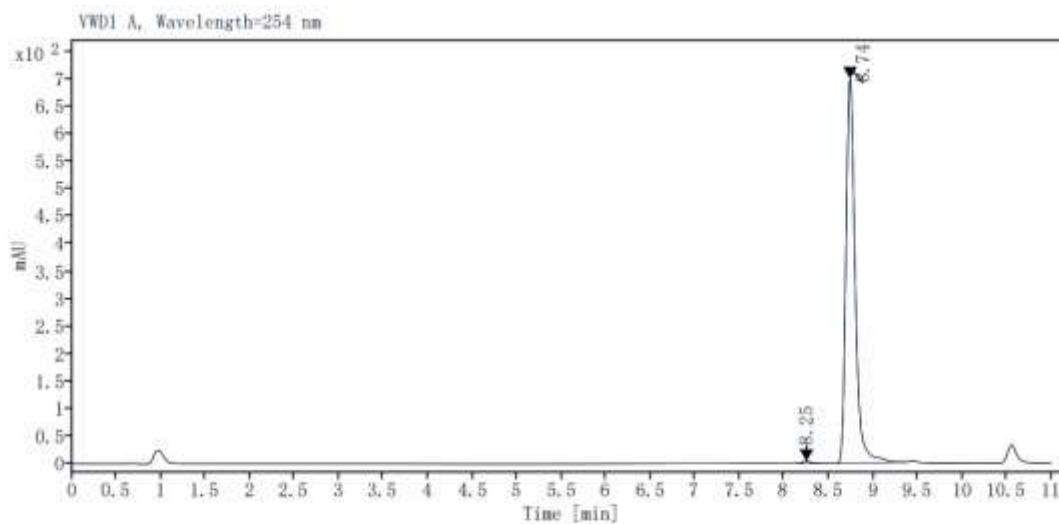

Signal: VWD1 A, Wavelength=254 nm

| Retention Time [min] | Peak Width [min] | Peak Area | Peak Height | Area %  |
|----------------------|------------------|-----------|-------------|---------|
| 8.250                | 0.1085           | 26.3020   | 3.7193      | 0.5225  |
| 8.740                | 0.1095           | 5007.5469 | 699.9510    | 99.4775 |

## HRMS spectra for S-19

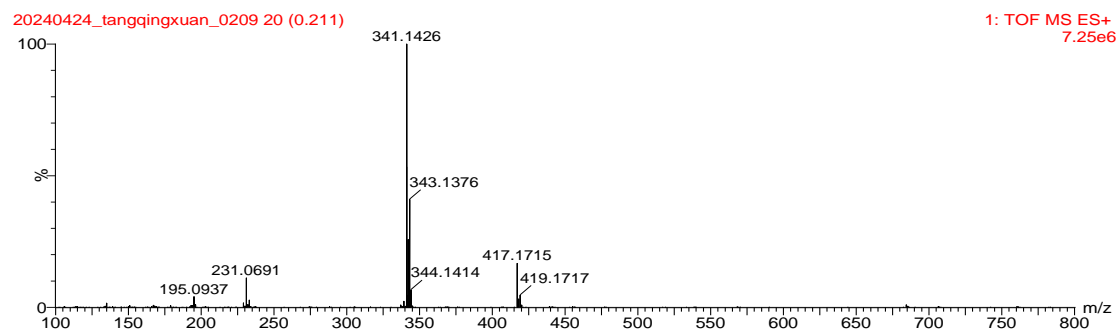

HRMS (ESI) calculated  $C_{20}H_{21}ClN_2O$ ,  $[M+H]^+ = 341.1421$ , and measured  $[M+H]^+$ : 341.1426

## HPLC trace for S-19 (purity, 96.13%, detection at 254nm)

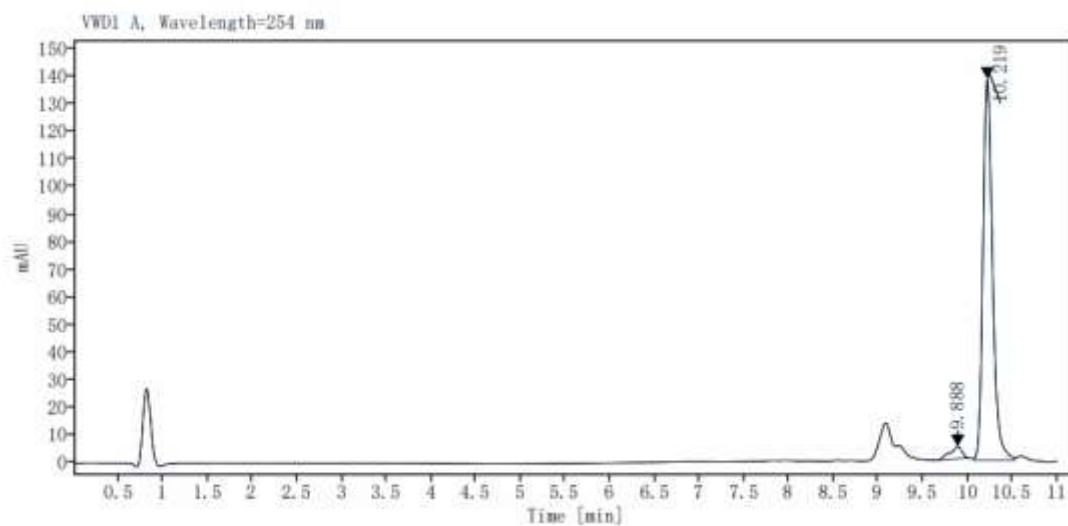

Signal: VWD1 A, Wavelength=254 nm

| Retention Time [min] | Peak Width [min] | Peak Area | Peak Height | Area %  |
|----------------------|------------------|-----------|-------------|---------|
| 9.888                | 0.1358           | 41.4052   | 4.3985      | 3.8714  |
| 10.219               | 0.1242           | 1028.1101 | 137.9924    | 96.1286 |



## HRMS spectra for S-20

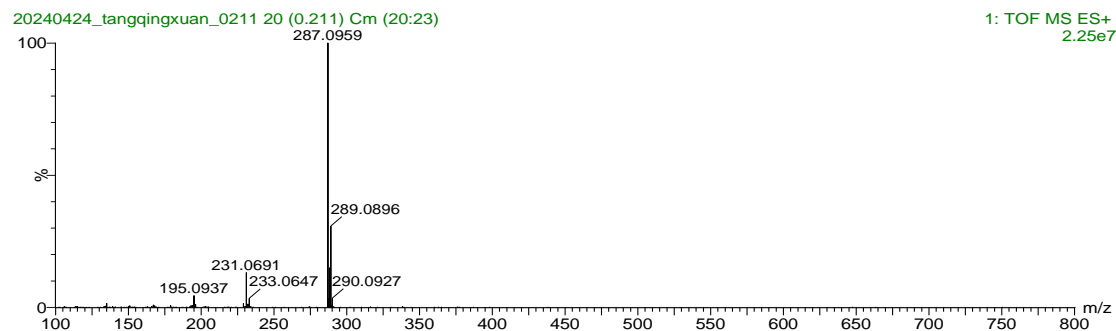

HRMS (ESI) calculated  $C_{16}H_{15}ClN_2O$ ,  $[M+H]^+ = 287.0951$ , and measured  $[M+H]^+ : 287.0959$

## HPLC trace for S-20 (purity, 100%, detection at 254nm)

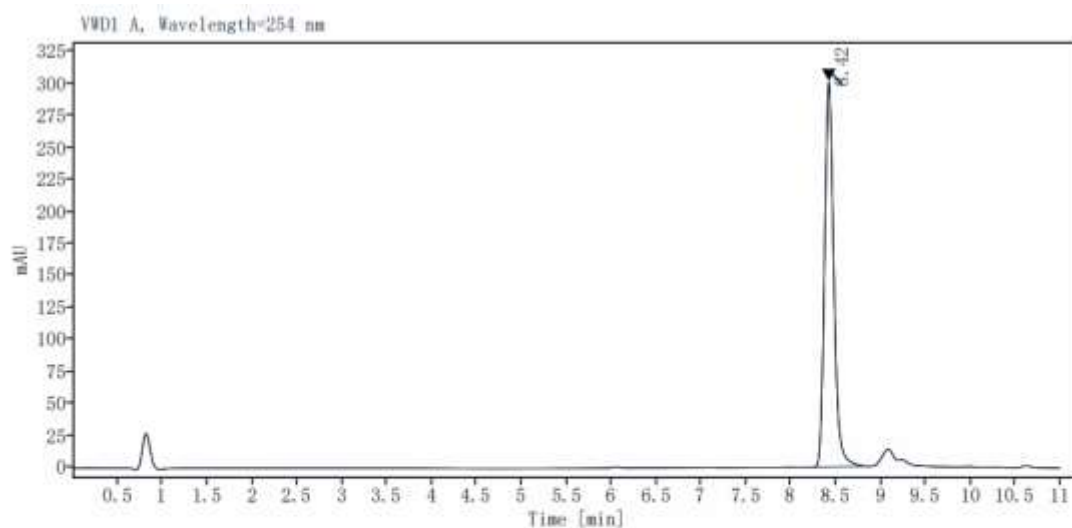

Signal: VWD1 A, Wavelength=254 nm

| Retention Time [min] | Peak Width [min] | Peak Area | Peak Height | Area %   |
|----------------------|------------------|-----------|-------------|----------|
| 8.420                | 0.1124           | 2176.6836 | 300.9221    | 100.0000 |

## HRMS spectra for S-21

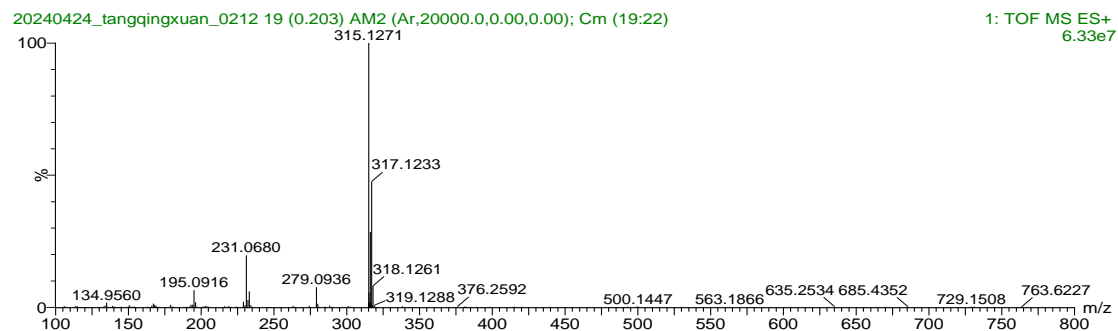

HRMS (ESI) calculated  $C_{18}H_{19}ClN_2O$ ,  $[M+H]^+ = 315.1264$ , and measured  $[M+H]^+$ : 315.1271

## HPLC trace for S-21 (purity, 100%, detection at 254nm)

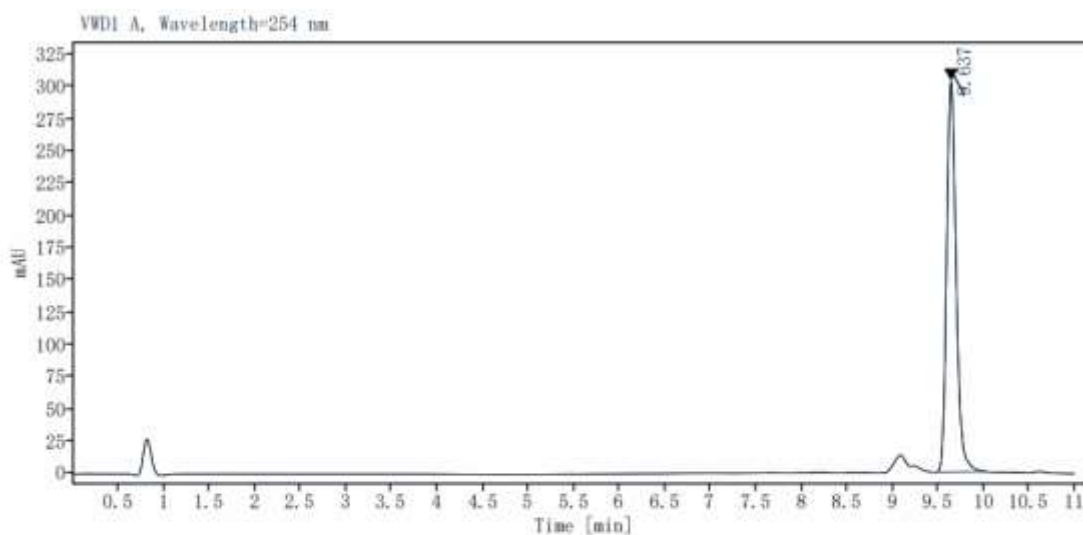

Signal: VWD1 A, Wavelength=254 nm

| Retention Time [min] | Peak Width [min] | Peak Area | Peak Height | Area %   |
|----------------------|------------------|-----------|-------------|----------|
| 9.637                | 0.1119           | 2178.3867 | 302.7588    | 100.0000 |

## HRMS spectra for S-23

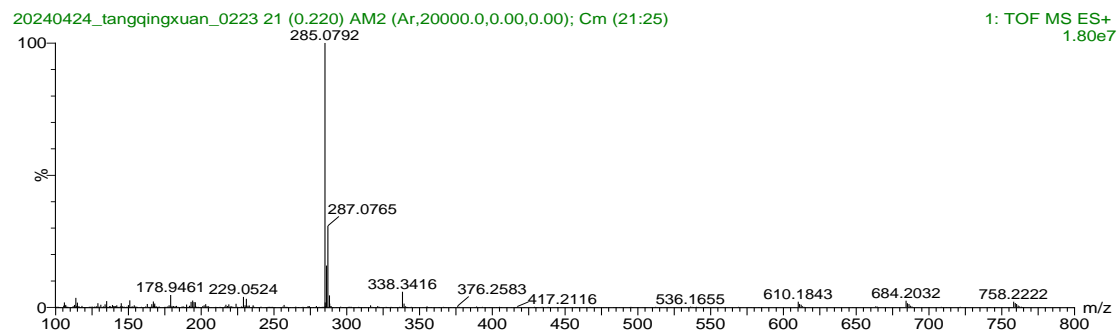

HRMS (ESI) calculated  $C_{16}H_{13}ClN_2O$ ,  $[M+H]^+ = 285.0795$ , and measured  $[M+H]^+ : 285.0792$

## HPLC trace for S-23 (purity, 100%, detection at 254nm)

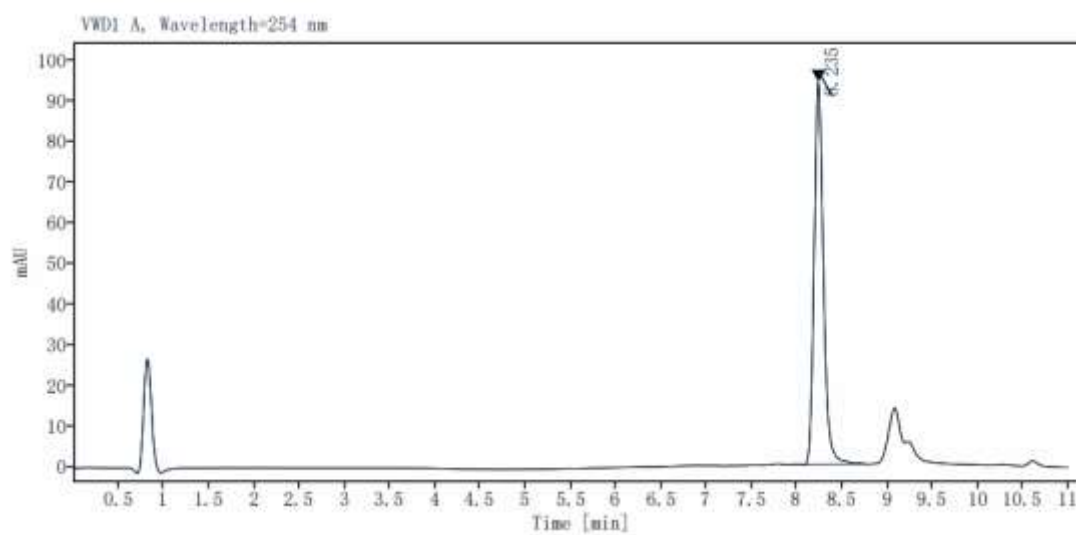

Signal: VWD1 A, Wavelength=254 nm

| Retention Time [min] | Peak Width [min] | Peak Area | Peak Height | Area %   |
|----------------------|------------------|-----------|-------------|----------|
| 8.235                | 0.1126           | 681.9696  | 94.0080     | 100.0000 |

## HRMS spectra for S-24

20240424\_tangqingxuan\_0226 22 (0.228) AM2 (Ar,20000.0,0.00,0.00); Cm (22:26)

1: TOF MS ES+  
4.43e7

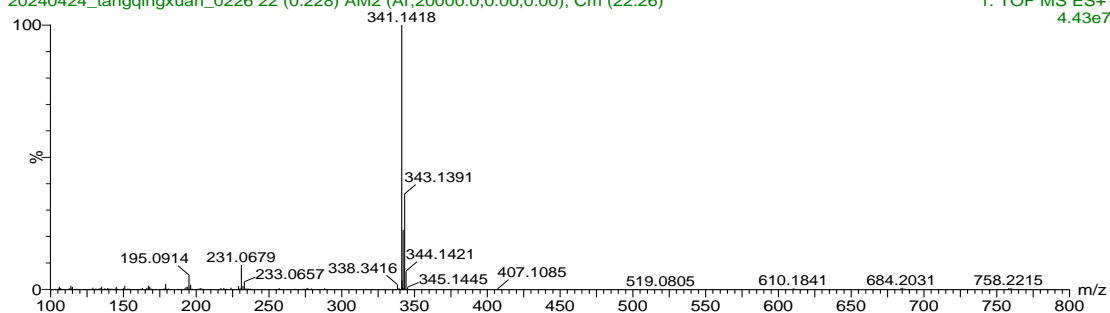

HRMS (ESI) calculated  $C_{20}H_{21}ClN_2O$ ,  $[M+H]^+ = 341.1421$ , and measured  $[M+H]^+ : 341.1418$

## HPLC trace for S-24 (purity, 100%, detection at 254nm)

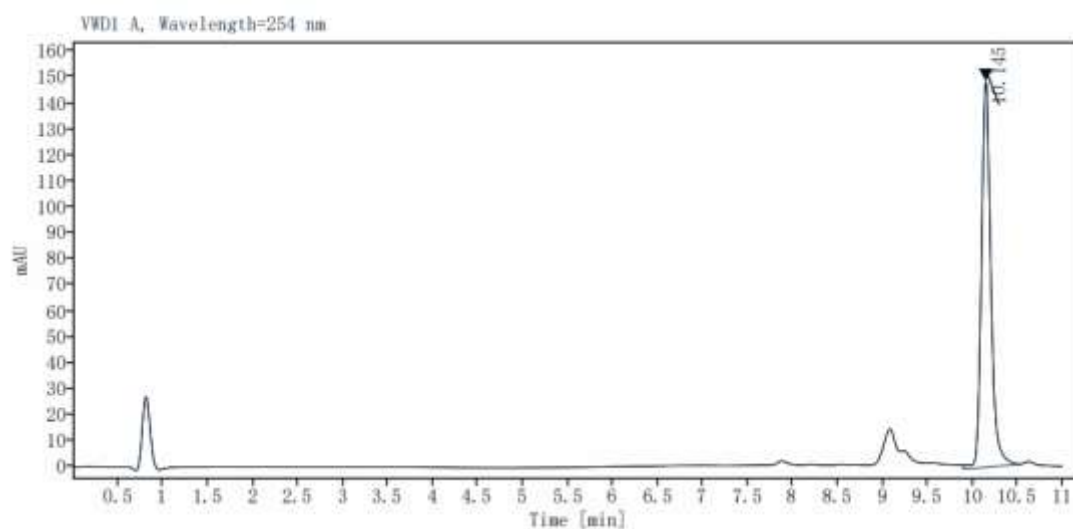

Signal: VWD1 A, Wavelength=254 nm

| Retention Time [min] | Peak Width [min] | Peak Area | Peak Height | Area %   |
|----------------------|------------------|-----------|-------------|----------|
| 10.145               | 0.1226           | 1094.2311 | 148.7195    | 100.0000 |

## HRMS spectra for S-22

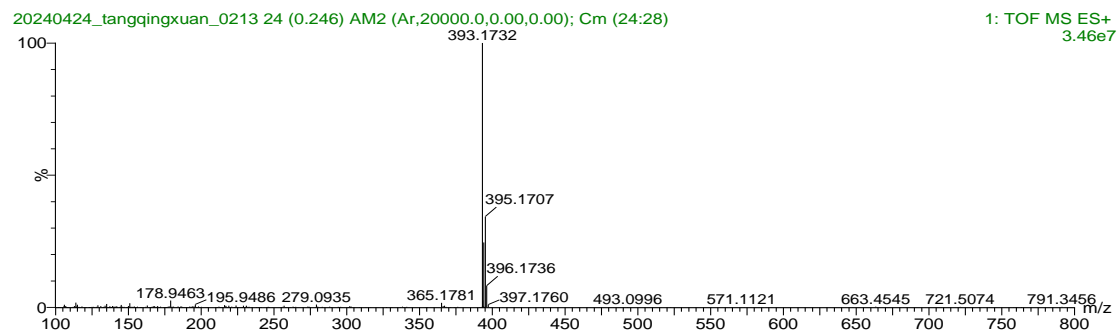

## HPLC trace for S-22 (purity, 98.35%, detection at 254nm)

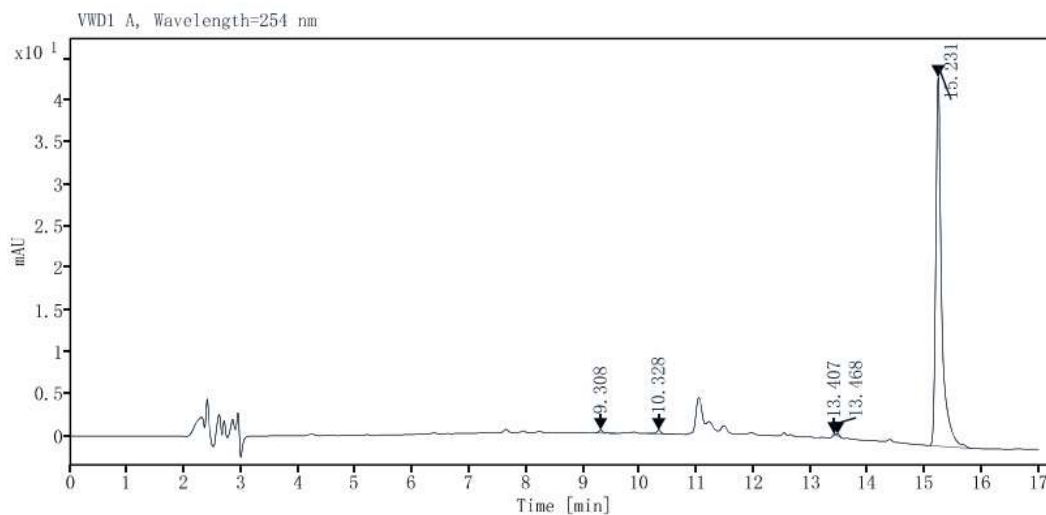

Signal: VWD1 A, Wavelength=254 nm

| Retention Time [min] | Peak Width [min] | Peak Area | Peak Height | Area %  |
|----------------------|------------------|-----------|-------------|---------|
| 9.308                | 0.0751           | 1.7604    | 0.3597      | 0.5365  |
| 10.328               | 0.0824           | 2.4012    | 0.4283      | 0.7318  |
| 13.407               | 0.0485           | 0.5058    | 0.1616      | 0.1542  |
| 13.468               | 0.0553           | 0.7580    | 0.2248      | 0.2310  |
| 15.231               | 0.1095           | 322.6840  | 44.0537     | 98.3465 |

## HRMS spectra for S-25

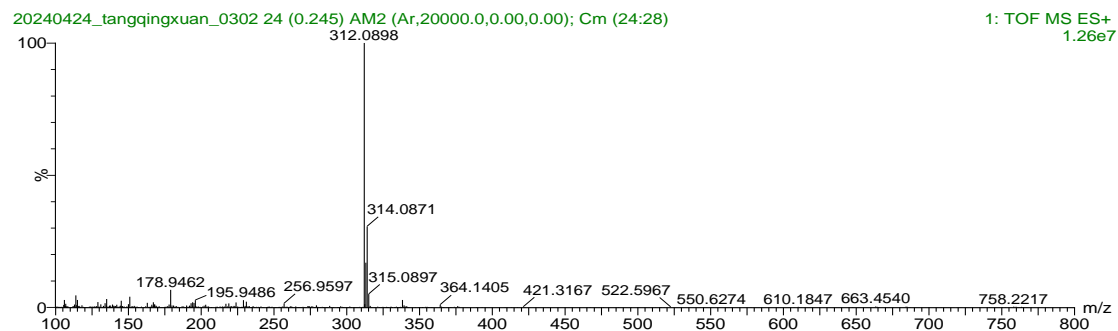

HRMS (ESI) calculated  $C_{18}H_{15}ClN_2O$ ,  $[M+H]^+ = 312.0904$ , and measured  $[M+H]^+$ : 312.0898

## HPLC trace for S-25 (purity, 100%, detection at 254nm)

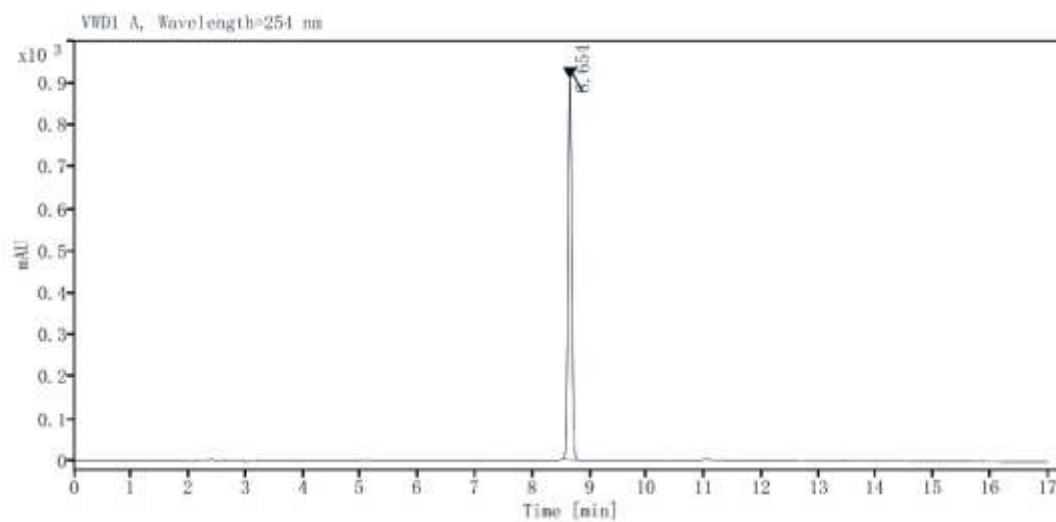

Signal: VWD1 A, Wavelength=254 nm

| Retention Time [min] | Peak Width [min] | Peak Area | Peak Height | Area %   |
|----------------------|------------------|-----------|-------------|----------|
| 8.654                | 0.0687           | 4024.3447 | 907.8820    | 100.0000 |

## HRMS spectra for 1b

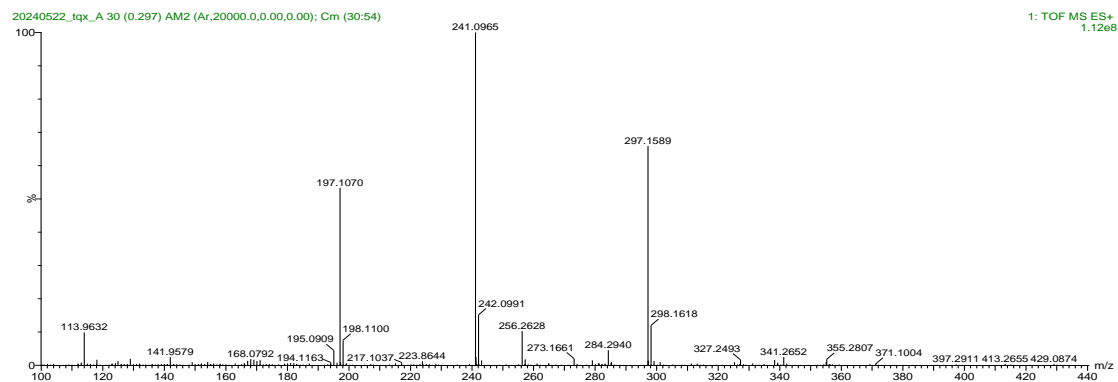

HRMS (ESI) calculated  $C_{18}H_{20}N_2O_2$ ,  $[M+H]^+$  = 297.1603, and measured  $[M+H]^+$ : 297.1589

## HRMS spectra for 1d

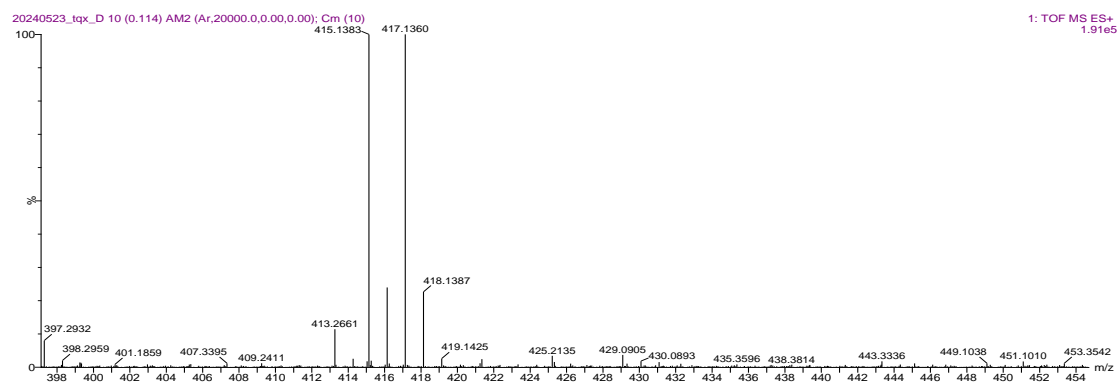

HRMS (ESI) calculated  $C_{22}H_{27}BrN_2O$ ,  $[M+H]^+$  = 415.1385, and measured  $[M+H]^+$ : 415.1383

## HRMS spectra for S-1 derived PROTAC

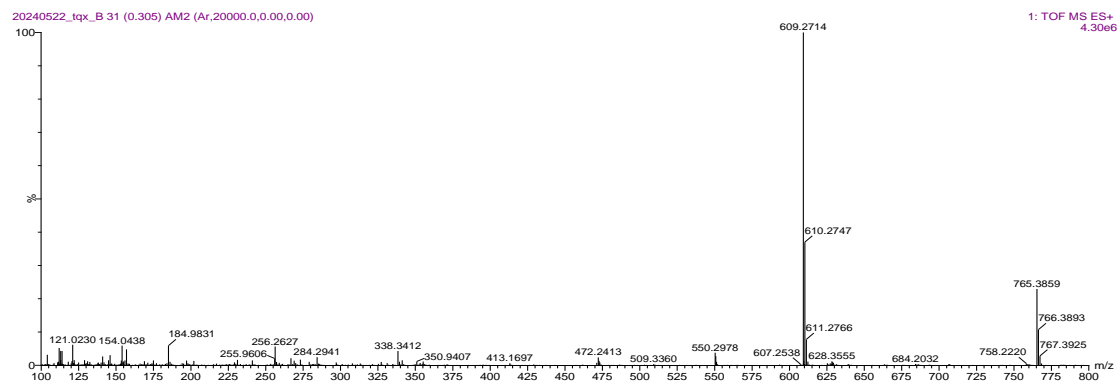

HRMS (ESI) calculated  $C_{35}H_{36}N_4O_6$ ,  $[M+H]^+ = 609.2713$ , and measured  $[M+H]^+ : 609.2714$

## HPLC trace for S-1 derived PROTAC (purity, 100%, detection at 254nm)

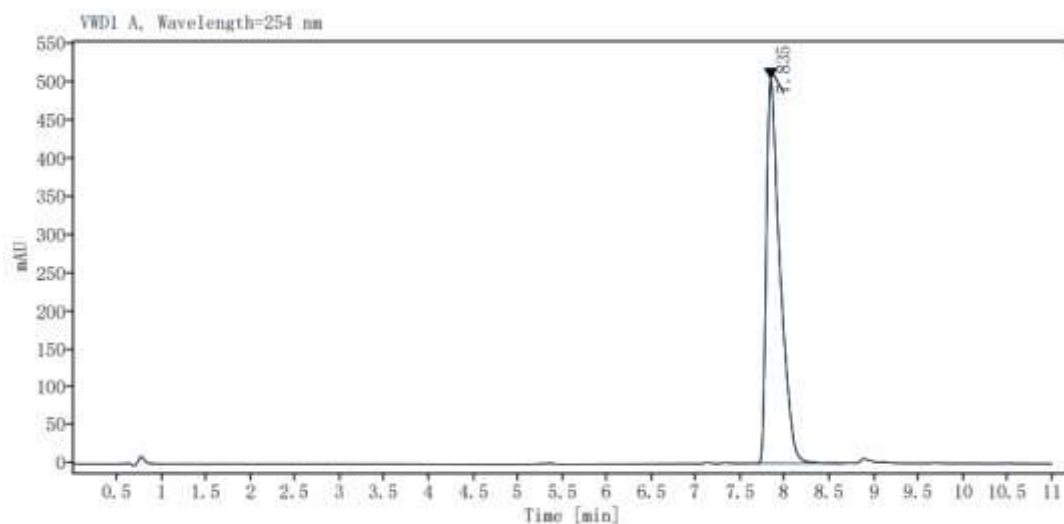

Signal: VWD1 A, Wavelength=254 nm

| Retention Time [min] | Peak Width [min] | Peak Area | Peak Height | Area %   |
|----------------------|------------------|-----------|-------------|----------|
| 7.835                | 0.1567           | 5365.6885 | 502.1758    | 100.0000 |
